# Supplementary material for: A Genome-Wide Identification Study Reveals That HmoCYP76AD1, HmoDODAα1 and HmocDOPA5GT Involved in Betalain Biosynthesis in Hylocereus
Source: MDPI journal article supplement (doi:10.3390/genes12121858), 2021-11-23
Supplement: s1 [file s1]

**Text S3.** The information of all vectors used for functional analyses

1) Diagrams of the constructed vectors.

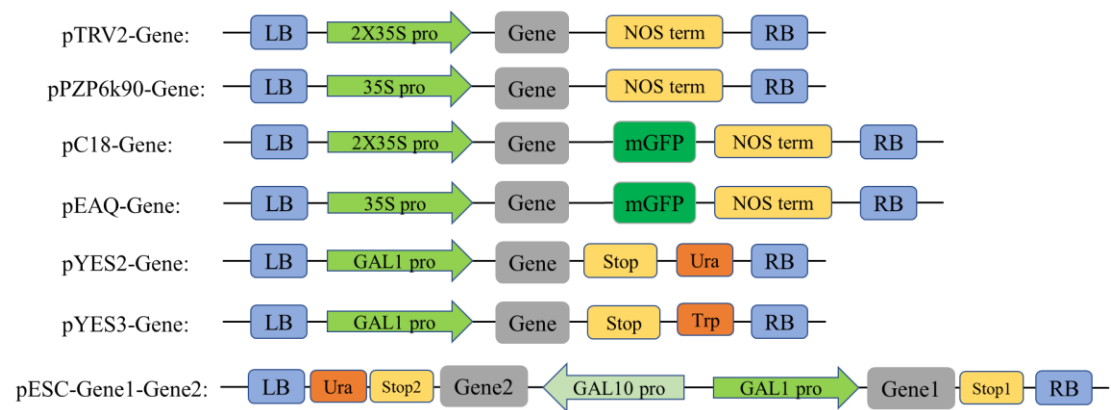

2) The detail information of all vectors

pTRV1 and pTRV2:

Liu Y, Schiff M, Marathe R, Dinesh-Kumar SP. (2002b). Tobacco Rar1, EDS1 and NPR1/NIM1 like genes are required for N-mediated resistance to tobacco mosaic virus. Plant J 30: 415–429.

**pTRV1 (pYL192)**

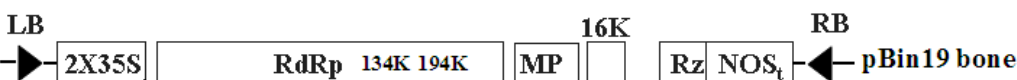

The entire sequence of cDNA corresponding to TRV Ppk20 strain RNA1 is deposited in GenBank (AF406990).

**pTRV2 (pYL156)**

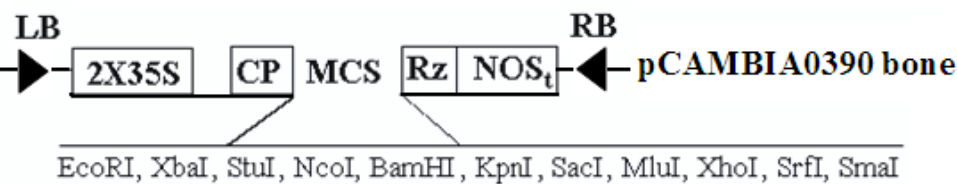

Plasmid pTRV2 was generated by subcloning the *Hind* III-*Eco*R I restricted fragment

of pYL36 into *Hind* III-*Hpa* I restricted pCambia0390 T-DNA vector. The complete sequence of pTRV2 is deposited in GenBank (AF406991).

**pC18:** Transient expression of recombinant proteins in plants.

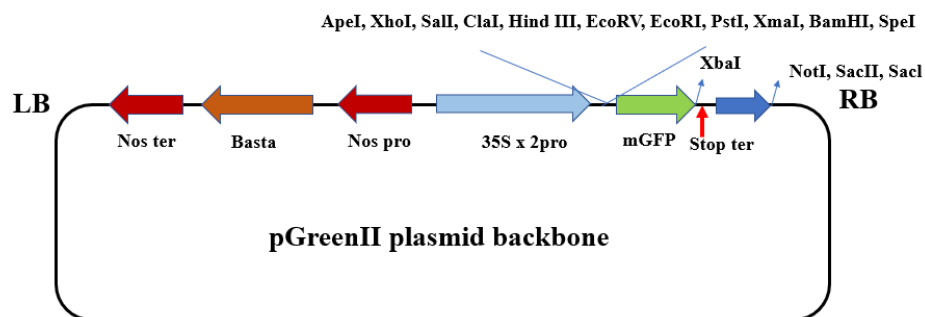

**pEAQ-GFP:** Transient expression of recombinant proteins in plants. The plasmid was produced from pEAQ-HT by insertion of GFP.

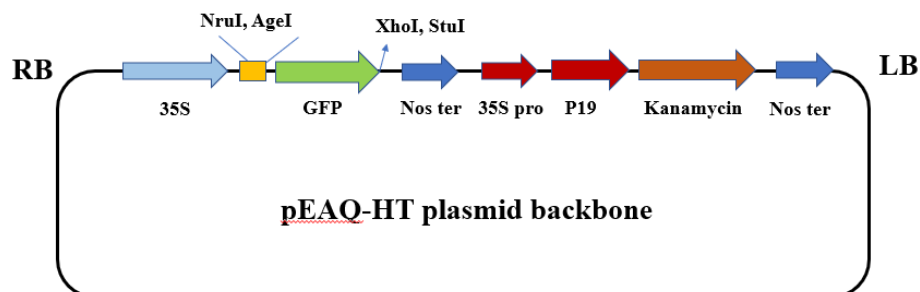

**pPZP6k90:** Genetic expression of recombinant proteins in plants. The plasmid was construct by our lab.

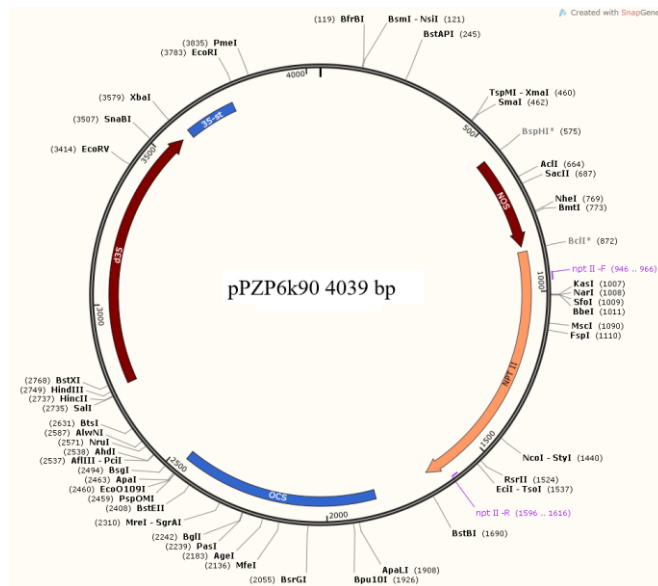

Plasmid circular map

**pYES2/CT and pYES3/CT** (Invitrogen, USA): pYES2/CT and pYES3/CT are 6.0 kb and 5.9 kb vectors, respectively, designed for inducible expression of recombinant proteins in *Saccharomyces cerevisiae*.

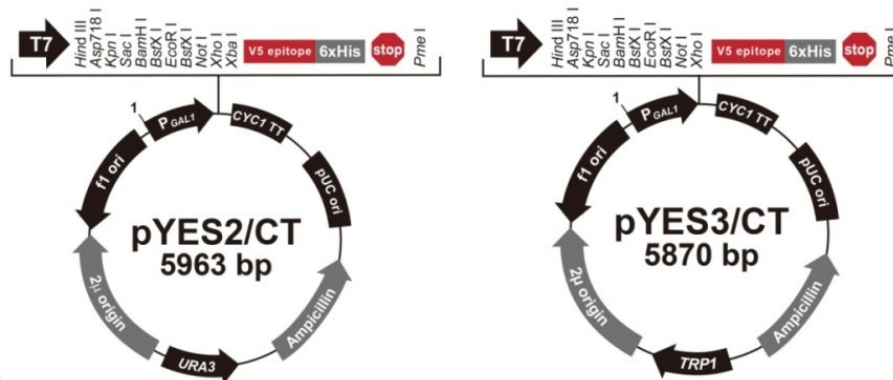

Plasmid circular map

**pESC-Ura** (<https://www.addgene.org/vector-database/7711/>): The pESC vectors are a series of epitope-tagging vectors for expression and functional analyses of eukaryotic genes in the yeast *S. cerevisiae*. These vectors contained the GAL1 and GAL10 yeast promoters in opposing orientation. Vectors with one or two genes were introduced into the yeast host strains under the control of a repressible promoter. When two genes are

co-expressed, protein-protein interactions can be confirmed by immunoprecipitation analysis.

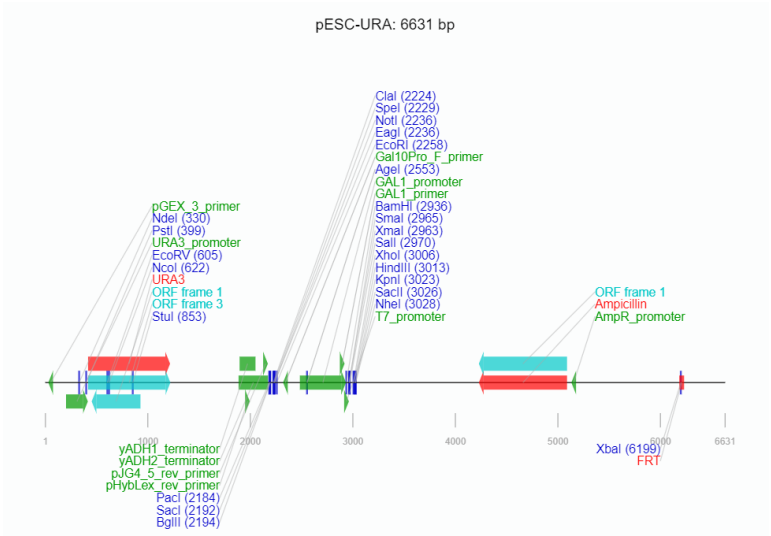

Plasmid linear map
