# Supplementary material for: A Genome-Wide Identification Study Reveals That HmoCYP76AD1, HmoDODAα1 and HmocDOPA5GT Involved in Betalain Biosynthesis in Hylocereus
Source: MDPI journal article supplement (doi:10.3390/genes12121858), 2021-11-23
Supplement: s1 [file s1]

**Text S2.** cDNA sequences of genes for VIGS in red pitaya.

**CYP76AD1**

> HU03G00480.1-R

ATGGATAGCCCAACCCTCTCGCTTTTCATCTTTGCCTCAATCTTTTACTTCATAACTTTTCA  
AATTGTGAAGCTAGGGTTTAATGTGGTCATGACCTCTAAAAAAACCAAAGAAGAAGAC  
CCCCCTTACCTCCGGGGCCCCAAGCCATTGCCCATCATAGGCAATGTGCTCGAGCTCGGGC  
CGAAGCCACACCGCTCGTTCGCCGACCTAGCCAAGGTCCATGGTCCACTCATGTCCCTC  
CGGCTAGGTAGTGTGACCACGATTATCGTGTTCATCCTCTGATGTTGCCAAAGAAATGTTT  
CTTAAAAATGACCAACCCTTGAGCTCCAGCCGAACCATACCCAACTCAGTCACGGCTGG  
GGATCACCACATGCTGACCATGTCTTGGCTCCCAGTCTCCCCCAAATGGCGGAGTTTTAG  
GAAGATCACCACCTTCCACCTTCTCTCCCCCAGCGCCTCGATGCTTGCTCTAGCCTTAG  
GCAAGCCAAGGTGCAGCAGCTATTCGAGTACGTTCTGGAATGTTCTAGAACCGGCCAGG  
CCGTCGATATAGGCAAGGCTGCTTTCACGACGTCCCTTAACTTGTTGTCCAAGCTGTTTT  
TTTCTTTAGAGTTGGCTCACCATAGATCTAGCAAGTCTCAAGAGTTTAAGGACTTAATTT  
GGGATATTATGGAGGATATTGGGAAGCCTAATTACGCGGATTATTTCCCATGCTTAAAGTA  
CTTTGACCCATGTGGAATACGACGTCGTTTGGCAAATAGTTTTGAGAAATTAATTGAGGT  
CTTTCAAGGTATTATTCGTCAAAGGCTATCCCTGTCATCTGGCTCTCATACTCATAATGAT  
GTGTTAGATGTTCTTCTTCAATTGTACAACCAAGAGGAACTCACCATGGACGAGATAAA  
CCATCTGCTCGTGGATATATTTGATGCCGGAACAGACACCACTTCCAGTACATTTGAATG  
GGCCATGGCTGAGTTAATTAATAATCCGACGATGATGGAGAAAGCTCAAGCTGAAATCA  
AAGTGGTTCTTGGGAAACAGTCGCATATTCAAGAGTCCGATATCCCAAATGTCCTTATT  
TGCGGGCAATTATCAAAGAAACATTGCGTCTACACCCTCCTACTGTATTCCTCCTACCTC  
GTAAGGCTGAGACCGATGTGGAACCTCTATGGCTACACCGTACCAAAAAATGCACAAATA  
CTGGTGAACCTGTGGGCCTTAGGTGCGAGACCCCAAAGTTTGGGAAAACCCAGAGGTGT  
TCTTACCTGAAAGGTTCTGACTTGCGACATCGATGTTAAAGGAAGAGATTTTGGACTAC  
TGCCTTTTGGGGCAGGAAGGCGAATATGTCCTGGGATGAATTTGGCGTACAGAATGCTG  
ACCTTAATGCTCGCTACGCTTCTACAATCGTTTGATTGGAAACTCCCAAATGAGATGAAC  
TCCAAGAATTTGGACATGGATGAAAAGTTTGGGAATAGCATTGCAAAAGACTAAACCCCT  
TGAAATTATTCCCGTTTGCAAGGATTGA

## DOD $\alpha$

> HU03G01342.1-R

ATGGGTGTTGGCAAAGAAGTGTCGTTCAAGGAGACTTTCTATGTGTCTCATGGGAATCC  
GGCCATGTTGGCCGATGTGTCGTTCATAGCACGGAACCTCCTGCTGGGGTGGAAGACGA  
ATGTCTTCCCCATCAAACCCAAGTCGATCCTGGTTGTCTCTGCTCACTGGGAGACTGATG  
TGCCTTCTGTATCTGCCGGTGAACATCCTGATGTCATTTACGATTTCAGCGATGTTCCCTGA  
CTGTATGTTCCAGATGAAGTACCCAGCTCTAGGGTCACCAAACTGGCCAAAAGGGTG  
AGGAGCTACTGATAGCAGGAGGGTTCAAGACAGCGAGCCTAGACGAGAGTCGTGGGT  
CGACCACAGCTCATGGGTGCCCCTGAGCCTCATGTACCCTGAGGCTGACATCCCGGTGT  
GCCAGCTCTCAGTCCAGCCTCACCTAAGCGCGAGCCACCACTTCGACATAGGGAGGGCT  
TTGGCTCCTCTCAAGGAGGAAGGGGTCCTGTTTATTGGGTCTGGGGGTGCAGTGCACCC  
TTCTGATGACACCCACACTGGTCTGATGGGGTTGCCCCTTGGGCTGCTGAGTTTGATCA  
ATGGCTTGAGGATGCTCTCATTAATGGAAGGTACGATGATGTGAATAATTATCAAACAAA  
AGCACCTTCTGGGTGGAAAATAGCACATCCAATTCCAGAACACTTTTTACCGTTGCATGT  
AGCCATGGGTGCAGCTGGTGAAAAATCAAAGGCAGAGCTCATTTATCGTACGTGGGATC  
ATGGTACTCTTGGCTATGCCTCCTACAAGTTCACCTTCCATCTGA

> HU03G01342.1-W

ATGGGTGTTGGCAAAGAAGTGTCGTTCAAGGAGACTTTCTATGTGTCTCATGGGAATCC  
GGCCATGTTGGCCGATGTGTCGTTCATAGCGCGGAACCTCCTGCTGGGGTGGAAGAAGA  
ATGTCTTCCCCATCAAACCCAAGTCGATCCTGGTTGTCTCTGCTCACTGGGAGACTGATG  
TGCCTTCTGTATCTGCCGGTGAACATCCTGATGTCATTTACGATTTCAGCGATGTTCCCTGA  
CTGCATGTTCCAGATGAAGTACCCAGCTCCAGGGTCACCAAACTGGCCAAAAGAGTG  
CAGGAGCTACTGATAGCAGGAGGGTTCAAGACAGCGAGCCTAGACGAGAGTCGTGGGT  
TCGACCACAGCTCATGGGTGCCCCTGAGCCTCATGTACCCTGAGGCTGACATCCCGGTG  
TGCCAGCTCTCAGTCCAGCCTCACCTAAGCGCGAGCCACCACTTCGACGTAGGGAGGG

CTTTGGCTCCTCTCAAGGAGGAAGGGGTCTGTTCATTGGGTCTGGGGGTGCAGTGCAC  
CCTTCTGATGACACCCACACTGGTTTGTATGGGGTCGCCCCTTGGGCTGCTGAGTTTGAT  
CAATGGCTTGAGGATGCTCTCATTAATGGAAGGTACGATGATGTGAATAATTATCAAACA  
AAAGCACCTTCTGGGTGGAAAATAGCACATCCAATTCCAGAACACTTTTTACCGTTGCAT  
GTAGCCATGGGTGCAGCTGGTGAAAAATCAAAGGCAGAGCTCATTTATCGTACGTGGGA  
TCATGGTACTCTTGGCTATGCCTCCTACAAGTTCACCTCCATCTGA

>HU08G01572.1-R

ATGCTTCAGCAACTAATTAGTGGATGGCAGAGATTGGGCATTGGCTGTCCTTATCTTGATT  
ATAAGTATCTCGTGACAGGCAGAGAAGTGGGTACACTTCTAATAGCTTCTAAGATCAAA  
ACAAGAGAAAACTAAATTTTCATTTGCACCAGCAAAATGGGTGAGCAGGAAGCAATTA  
GGGAGACATTCTACATATCTCATGGGACACCAAAGATGTCGATCGATGATTCTATAGCAG  
CAAAGAAGTTCTTTTCAGGAATGGGAGAAAGTCTACTCCAAGAGGCCAAAGTCTATGCTT  
GTGATCTCTGCTCACTGGGAGACTGATGTGCCTGCTGTTAATGCTGTTACTCACTCTGAT  
CTCATCTATGATTTTCAGGGGCTTTCCTGCCATCATGTACCAGCTCAAGTACCCAGCTCCTG  
GTGCACCAGATTTGGCAAGGAGGGTAGAGGAACTTCTGACAGCATCAGGGTTCAGCTG  
TGTTGTAGACAAGAAGCGCGGTCTTGATCATGGCTCATGGGTGCCTCTCATGCTCATGTA  
CCCGGAGGCTGATATCCCGTTTGCCAGCTCTCAGTGCAATCACACCTAGATGGAACGC  
ACCACTATAACTTGGGAAAGGCTTTGGCTCCTCTTAAGGAGGAAGGTGTCCTTATCATTG  
GTTCTGGGAGTGCTGTTCAACCCTTCAAATAGTACTCCTATTTCTCTTGATGGAGTTGCTCC  
TTGGGCTGCAGCGTTCGATTCCTGGCTAGAAGAAGCTCTCAAAGTGGAAGGTATGAAG  
ATGTGAACAATTATCAAGCAAAGGCACCAAAGTGGGAACTGGCACACCCATGGCCAGA  
GCACTTTTACCCATTACATGTAGCCATGGGTGCAGCTGGTGAAAACCTCGAAGGCCGAGC  
TTATTCATCGCAGtTGGGACCATGGCACCCCTTGGCTATGCCTCCTACATATTCACCTCCTGC  
TGA

**B5GT**

> HU01G00156.1-R

ATGAACATGGCTGCTGAAGATCAACAGCTTCATGTAGTGTTCTTCCCCTTCTTGGCCCAT  
GGCCATATGATTCCGACCCTCGATGTTGTAAGGCTCTTTGCATGTCATGGGGTCAGGGTC

ACCATCATCACCACCCCTCTGAACGCCCACATCTTCAATAAGGCTGTTGAGACGGCTAC  
GAAAATGGGTGCCCCGGGTCGTTGATGTTGAGCTATTCAGGTTCCCTGCCGAAGAAGCAG  
GCCTGCCAGAAGGATTTGAGAACTTAGAGCTAGTTAAGGAGGATGACATGATTGTTAAG  
TTCATCGCTGCCAGTGAGCTGCTCAGAGAGCAGCTTGAGCCATACTTGGAGAAGACACG  
ACCGAACTGCCTCGTTGCTGACATGTTTTTTCCATGGGCAACGGAGTGTGCAGCCAAGT  
TCGACATCCCTAGGCTAGTCTTCCATGGCACTAACTTCTTTTACTTGTGTGCTTCGGAGAT  
TATCAGGCTATATGAGCCTTATAAGAATGTCTCTTCGGATGAGGAGCCATTCGCTCTTCCG  
TCCCTTCCACATGAGATACAGATGACAAGACTGCAGCTACCAGAGGATCTATGGAAGTA  
CGAGGAATCCGATTTCAAAGGAGGATAGCACTAATCCACGAATCGGAGGTTGCAAGCT  
ATGGGGTGATCGTCAACAGCTTTTATGAGTTGGAACCGGATTATGCAGATTTCTTCGGGA  
AGGAATTAGGAAGGAGGGCATGGCATATAGGCCCAGCTTTACTCTGCAATAGGAGTACC  
AAGAACAAAGCTCAGAGGTTGAAACAACCCGATCTAGATGAACACGAGTGCCTGAAGT  
GGCTTA ACTCAAGGAAGCCCACTCAGTCATTTACATCTGTTTCGGAAGCACTGCACAT  
GTGATTGGCCCTCAGCTACATGAGATAGCAGTGGCTTTGGAAGCGTCAGAACAAAGCGTT  
CATTTGGGTAGTGAAGAATGAGGATTACGAAAAGAGTGCAGAGTGGTTGCCACAGTG  
TTTGAGGAGCGGTTGGAACAACGAGGTCTAATTATAAAAGGGTGGGCTCCTCAGGTGCT  
TATTTTAGAGCATGAAGCTATAGGAGCATTTGTGACCCACTGTGGATGGAACCTCGATCTT  
AGAAGGGATCTCGGCTGGGGTGCCAGTGGTTACATGGCCTGTTTTTGCTGAGCAGTTCT  
ATAACGAAAGGTTCTGTGACTCAGATTTTGAAGATTGGGGTGCCATTGGATCTAAGAAG  
TGGGGTATTGTGACTACTACAGAGTACATGGTGAAACGGGACTCTATAGAGAAGGCATT  
GAGAGAAATCATGGTAGGAGAGGAAGCTGAGGAGAGGAGAAACAGAGCACAGAAGTT  
GAAGGCGATGGCATGGAAGGCTGTCTGAAGAAGGGGGTTCATCTTATTCTGATCTAAGTG  
CACTAATAAATGAGCTTAGGGTTTATCGCACTTAA

cDOPA5GT

>HU07G00240.1-R

ATGGACTCTGCAACAGAGCATATACTGATGCTCCCATACATGGCGCAGGGTCACATTCGC  
CCGTTTCATCGAGCTAGCCCACCGCCTCCAAGCCCGAACTGAAACCAGAACCCGAACCC  
ACTTCACCATCACCATCCTCACCACCCCTCTCAACGCTGAGCTCATCCGACGCCAATTCA

CCACCACCTCCACCATCCAAATTGCCGAGCTCCCCTTCAACGCCGCCGACCATGGCCTC  
CCTGCTGGCGTCGAGAACACCGACAAGCTCCCGTTCCCCCTCGTCGTCAACCTCTTCCA  
CGCCTCCTCCTCGCTTGAACCCACCTCCGCCACTTCATCGCCACCCGCTTCTCCCCCTG  
TAAACCCCTCTCTGCATTGTCTTCGACGTCTTCCTGGGATGGGTTGACGCCGTCGCTAG  
GAGCTTTGGATCCACCGGAGTCGCCTTACCACCGGCGGCGCGTATGGGACGGCGGCGT  
ATTGTCACTGTGGCTTGATCTACCTCACCGAACTTCTCAGACGATGAGGACTTCCCTT  
TGCCTGGATTCCCGGAGAACCACCGCTATCGCCGCTCCCAGCTCCACCGGTTCTTAAGAT  
ACGCTGATGGGTCGGATCAGTGGTCGCGGTTTTTCCAGCCCCAGCTGCGGTTCTCAATT  
GGTAGCCTCGGATGGCTCTGTAATCCGTCGAGGAGATTGAGCCTCTGGGGTTTGAAATT  
CTTCGGAATTACCTCAAATCACCGGTCTGGGCAGTCGGGCCGTTGATTCCGGATCCTCCG  
CCGGTGGATAAATCATCATCTTCTTGTGACAAATGCATCCAGTGGTTAAATTCCCACAAA  
GCCGATTCCGTTTTATACATCTCATTCCGGTCGCAGAATACGATTTCCCCGACCCAGATGA  
TGGAGCTGGCTATGGGTTTAGAGCTAAGTGGGAAGCCATTTTTGTGGGTGATCCGGCCT  
CCGTTCCGGTTCGACATCAACGGAGAATTCCGACTCGAATGGCTTCCGGATGGGTTCGA  
GGAGCGCGTGAAGAACAACAACCAGGGGATGTTGGTGCATAAATGGGGGCCTCAAATG  
GAGATACTGGGTCATGAATCAACGGGTGGGTTTCTCAGCCATTGTGGGTGGAACCTCGGT  
GTTGGAAGGACTGAGAGAGGGACTACCGATGATAGCGTGGCCATTGGCTGGGGAGCAG  
GCGTACAATTGAAGATGCTGGTGGAGGAGATGGCGGTGGCAGTGGAGCTGACGACGG  
GGTTGGAAGGGAAGGTGACTAAGGAGGCGGTGAAGAGGGTGGTGGAGCTGGTGTGG  
GGAGAGAGGAAGGGAGTGGTGGCGAGGAGATGAAGAAGAAGGCGGTTGAAGCAGGG  
AAGAAGCTTAGAGATGCATTAAGAGAAGAGGAAGATGGGTTAGGGTTTAAGGGATCTTC  
GATTAAAGCAATGGATGAGTTTTTGGATGCCATAGTTTCCGGCAGGGATCGACCAGCTGC  
TTGA
