# Supplementary material for: A Genome-Wide Identification Study Reveals That HmoCYP76AD1, HmoDODAα1 and HmocDOPA5GT Involved in Betalain Biosynthesis in Hylocereus
Source: MDPI journal article supplement (doi:10.3390/genes12121858), 2021-11-23
Supplement: s1 [file s1]

**Table S2.** All primers used in this study.

| Primer names    | Primer sequences (5'-3')   | Assays  |
|-----------------|----------------------------|---------|
| Actin(1) F      | AAAGGCTAACAGGGAGAAAA       | RT-qPCR |
| Actin(1) R      | GACCACTGGCGTAAAGAGAA       | RT-qPCR |
| AtActin2 F      | ATTCAGATGCCCAGAAAGTCTTGTTC | RT-qPCR |
| AtActin2 R      | ACCACCGATCCAGACACTGTACTTCC | RT-qPCR |
| NtActin1 F      | GGTATTGTGTTGGACTCGGG       | RT-qPCR |
| NtActin1 R      | GCTGTGGTAGTGGATGAGTAAC     | RT-qPCR |
| qHU03G02979.1 F | TGATGATGGTGAGAAGACGA       | RT-qPCR |
| qHU03G02979.1 R | GTAGTCGGAGCGAGAGTAGG       | RT-qPCR |
| qHU03G02980.1 F | GATTCTATCCACCGAACCTG       | RT-qPCR |
| qHU03G02980.1 R | TATCAAAGTCACGAGGCAAA       | RT-qPCR |
| qHU03G00480.1 F | GCTCCAGCCGAACCATACCC       | RT-qPCR |
| qHU03G00480.1 R | TCTTCCTAAAACCTCCGCCAT      | RT-qPCR |
| qHU03G00481.1 F | AACCGAACCATACCAAACCTC      | RT-qPCR |
| qHU03G00481.1 R | AGGAGAGAGAAGGTGGAAGG       | RT-qPCR |
| qHU05G00563.1 F | CTTTCTTCTCAGTGGATTTGG      | RT-qPCR |
| qHU05G00563.1 R | TTGGGTTTCCCTATTTCATC       | RT-qPCR |
| qHU11G01870.1 F | GGAAATCGCCAAACAAGTC        | RT-qPCR |
| qHU11G01870.1 R | GTGGTGGTCGGAAACCTT         | RT-qPCR |
| qHU07G00504.1 F | GCAACCACCTCACTCAACTT       | RT-qPCR |
| qHU07G00504.1 R | TCTTCCAACAGATGCCAAG        | RT-qPCR |
| qHU09G01023.1 F | ATTGGTTCAAAGGACGAT         | RT-qPCR |
| qHU09G01023.1 R | ATTGTTGCTAAGCAGTTG         | RT-qPCR |
| qHU11G01017.1 F | TGGAGTATCTTTTGCCCTTC       | RT-qPCR |
| qHU11G01017.1 R | AGGCTTTGAGGTGGGTTAGT       | RT-qPCR |
| qHU01G02117.1 F | GAGAGAGTGGGGGAGTTGA        | RT-qPCR |
| qHU01G02117.1 R | GCAAGCCAAGGAATAAAATC       | RT-qPCR |
| qHU07G00784.1 F | TTCGGAGCAGGTAGAAGAAT       | RT-qPCR |
| qHU07G00784.1 R | TTCCAGGCAATACATCAAAG       | RT-qPCR |
| qHU04G00093.1 F | TAGCGATGAACCAAACGAA        | RT-qPCR |
| qHU04G00093.1 R | CAGAACCCAAGAAAGGAAGA       | RT-qPCR |
| qHU03G01342.1 F | TGTGCCTTCTGTATCTGCCG       | RT-qPCR |
| qHU03G01342.1 R | TGTCTTGAACCCTCCTGCTA       | RT-qPCR |
| qHU08G01571.1 F | GGTCGCCGATGCTTTCTGTT       | RT-qPCR |
| qHU08G01571.1 R | TTCTTGTGCTCGCTTTGCCA       | RT-qPCR |
| qHU08G01572.1 F | GACTGATGTGCCTGCTGTTA       | RT-qPCR |
| qHU08G01572.1 R | AGTTCCTCTACCCTCCTTGC       | RT-qPCR |
| qHU01G00156.1 F | GGAGAAGACACGACCGAAC        | RT-qPCR |
| qHU01G00156.1 R | CCGAAGCACACAAGTAAAAG       | RT-qPCR |
| qHU01G00157.1 F | GTTCACTCTTCCTTCGCTTC       | RT-qPCR |
| qHU01G00157.1 R | CATCCAATCACTTTCCTCGT       | RT-qPCR |
| qHU03G00258.1 F | TTGAAAACCTGGGGTCTCC        | RT-qPCR |
| qHU03G00258.1 R | ACTTCTTGGCTCTGCTTCTC       | RT-qPCR |

| Primer names    | Primer sequences (5'-3') | Assays       |
|-----------------|--------------------------|--------------|
| qHU03G00266.1 F | CTGAAGCAACCAAACTGAC      | RT-qPCR      |
| qHU03G00266.1 R | AGCCCAAGGAAACTGAAAAT     | RT-qPCR      |
| qHU03G00267.1 F | ACTTTGCGACCTGATTGTCT     | RT-qPCR      |
| qHU03G00267.1 R | ATGTTCTTGAGTGGTTGGTG     | RT-qPCR      |
| qHU10G00514.1 F | ATGCTTTCTTTCCCTTCG       | RT-qPCR      |
| qHU10G00514.1 R | ACCTGCTTCCACAATCCTTA     | RT-qPCR      |
| qHU06G00241.1 F | TACATTGATTCCCAGACACG     | RT-qPCR      |
| qHU06G00241.1 R | GGACAGCCTCCTTTACGAAG     | RT-qPCR      |
| qHU06G00243.1 F | GCATTTTCAGTCGTCATCCTA    | RT-qPCR      |
| qHU06G00243.1 R | AAGGGGCTTGTGGTCCTC       | RT-qPCR      |
| qHU07G00076.1 F | GCCCTACATCTTCTACCCTACA   | RT-qPCR      |
| qHU07G00076.1 R | TCACCCAACCTCCCTAAACTC    | RT-qPCR      |
| qHU11G01695.1 F | TCTCACTCTTCCTCCACCTC     | RT-qPCR      |
| qHU11G01695.1 R | TCAGCCAACCGATACCTC       | RT-qPCR      |
| qHU11G01696.1 F | GGGTCGGTTCTATTTGTGTC     | RT-qPCR      |
| qHU11G01696.1 R | GAGTGTTTCGTTTGGGCTTC     | RT-qPCR      |
| qHU11G01697.1 F | AAACGGTGTCTGTGACTAC      | RT-qPCR      |
| qHU11G01697.1 R | AAATACCCTCAGCCAATACG     | RT-qPCR      |
| qHU11G01698.1 F | GGGTCGGTTTTATTTGTGTC     | RT-qPCR      |
| qHU11G01698.1 R | GACTTTGGGCAGTGAAGAAC     | RT-qPCR      |
| qHU05G01532.1 F | TCCCTCACTTCACCTTTCAT     | RT-qPCR      |
| qHU05G01532.1 R | ACCACCATTTCATAACCCAAG    | RT-qPCR      |
| qHU07G00240.1 F | CGGCGTATTTGTCACTGT       | RT-qPCR      |
| qHU07G00240.1 R | CGACCCATCAGCGTATCTTA     | RT-qPCR      |
| qHU08G02083.1 F | CCGCAAGGACACAATAGAC      | RT-qPCR      |
| qHU08G02083.1 R | ACTGGAAAATGAACTGATGG     | RT-qPCR      |
| qHU09G01874.1 F | AACAAACATTCCCTCCAGTG     | RT-qPCR      |
| qHU09G01874.1 R | TTGGTAGCCTTTCCAGTAGC     | RT-qPCR      |
| qHU09G01875.1 F | TCATCATCTCGTAGCCTCCT     | RT-qPCR      |
| qHU09G01875.1 R | CTGTAGGTCGTGGAAC TCAA    | RT-qPCR      |
| qHU03G02206.1 F | GCAAGCCAATACAACAAGC      | RT-qPCR      |
| qHU03G02206.1 R | GCAAAAACACCACCGAACG      | RT-qPCR      |
| qHU07G01550.1 F | GTGGCAGAACCTCCTCTTTA     | RT-qPCR      |
| qHU07G01550.1 R | GGCTTGTTGTATTGGCTTG      | RT-qPCR      |
| qHU09G01034.1 F | GTTGCTTCGTGAGCCATT       | RT-qPCR      |
| qHU09G01034.1 R | CCCTCTTCTCTACCTCCACA     | RT-qPCR      |
| qHU04G00198.1 F | CTGTTTACGGCTGCTTACCT     | RT-qPCR      |
| qHU04G00198.1 R | ATTCATCCCTCCACCAAAT      | RT-qPCR      |
| qHU10G01599.1 F | AAGAAACCTCCCTGTCAATG     | RT-qPCR      |
| qHU10G01599.1 R | GCATCACA CTCTCGGAAA      | RT-qPCR      |
| qHU07G01678.1 F | TCTATGAAGGTCCCCCTGT      | RT-qPCR      |
| qHU07G01678.1 R | ACCAGCGAAAAGAAGAGGTT     | RT-qPCR      |
| CYP76AD1 F      | ATGGATAGCCCAACCCTCT      | Gene cloning |

| Primer names            | Primer sequences (5'-3')                     | Assays                   |
|-------------------------|----------------------------------------------|--------------------------|
| CYP76AD1 R              | TCAATCCTTGCAAACGGGAA                         | Gene cloning             |
| DODA $\alpha$ 1 F       | ATGGGTGTTGGCAAAGAAGTGTC                      | Gene cloning             |
| DODA $\alpha$ 1 R       | TCAGATGGAAGTGAACCTGTAGG                      | Gene cloning             |
| DODA $\alpha$ 2 F       | ATGCTTCAGCAACTAATTAGTGGATGGC                 | Gene cloning             |
| DODA $\alpha$ 2 R       | TCAGCAGGAAGTGAATATGTAGGAGG                   | Gene cloning             |
| B5GT1 F                 | ATGAACATGGCTGCTGAAGATCAA                     | Gene cloning             |
| B5GT1 R                 | TTAAGTGCATAAACCCCTAAGCTCA                    | Gene cloning             |
| B5GT2 F                 | ATGGGTGCTCAACCTCAACAGCT                      | Gene cloning             |
| B5GT2 R                 | TCAAGCAGCTGGTCGATCCCT                        | Gene cloning             |
| CDOPA5GT F              | ATGGACTCTGCAACAGAGCATA                       | Gene cloning             |
| CDOPA5GT R              | TCAAGCAGCTGGTCGATCCCT                        | Gene cloning             |
| QCYP76AD1-TRV2 F        | AGCCGAACCATAACCCAAC                          | RT-qPCR for VIGS         |
| QCYP76AD1-TRV2 R        | GGGAGAGAAGGTGGAAGGT                          | RT-qPCR for VIGS         |
| QDODA $\alpha$ 1-TRV2 F | AGCAGGAGGGTTCAAGACAG                         | RT-qPCR for VIGS         |
| QDODA $\alpha$ 1-TRV2 R | GCTTAGGTGAGGCTGGACTG                         | RT-qPCR for VIGS         |
| QDODA $\alpha$ 2-TRV2 F | GAGACTGATGTGCCTGCTGT                         | RT-qPCR for VIGS         |
| QDODA $\alpha$ 2-TRV2 R | GCTGAACCCTGATGCTGTC                          | RT-qPCR for VIGS         |
| QB5GT1-TRV2 F           | CGGGTCGTTGATGTTGAG                           | RT-qPCR for VIGS         |
| QB5GT1-TRV2 R           | GCAGTTCGGTCGTGCTTCT                          | RT-qPCR for VIGS         |
| QB5GT2-TRV2 F           | CGAGCAGTATTTGGATAAGACG                       | RT-qPCR for VIGS         |
| QB5GT2-TRV2 R           | AGCGAAGGAAGAGTGAACAG                         | RT-qPCR for VIGS         |
| pC18-CYP76AD1 F         | GGTATCGATAAGCTTATGGATAGCCCAACCCTCTC          | transient expression     |
| pC18-CYP76AD1 R         | CATACTAGTGGATCCATCCTTGCAAACGGGAATAA          | transient expression     |
| pC18-DODA $\alpha$ 1 F  | GGTATCGATAAGCTTATGGGTGTTGGCAAAGAAGT          | transient expression     |
| pC18-DODA $\alpha$ 1 R  | CATACTAGTGGATCCGATGGAAGTGAACCTGTAGG          | transient expression     |
| pC18-DODA $\alpha$ 2 F  | GGTATCGATAAGCTT ATGCTTCAGCAACTAATTAG         | transient expression     |
| pC18-DODA $\alpha$ 2 R  | CATACTAGTGGATCC GCAGGAAGTGAATATGTAGG         | transient expression     |
| pC18-B5GT1 F            | GGTATCGATAAGCTTATGAACATGGCTGCTGAAGA          | transient expression     |
| pC18-B5GT1 R            | CATACTAGTGGATCCAGTGCATAAACCCCTAAGCT          | transient expression     |
| pC18-B5GT2 F            | GGTATCGATAAGCTTATGGGTGCTGAACCTCAACA          | transient expression     |
| pC18-B5GT2 R            | CATACTAGTGGATCCAGTGCATAAACCCCTCAACT          | transient expression     |
| pC18-CDOPA5GT F         | GGTATCGATAAGCTTATGGACTCTGCAACAGAGCA          | transient expression     |
| pC18-CDOPA5GT R         | CATACTAGTGGATCCAGCAGCTGGTCGATCCCTGC          | transient expression     |
| pEAQ-CYP76AD1 F         | CAAATTCGCGACCGGTATGGATAGCCCAACCCTCTC         | subcellular localization |
| pEAQ-CYP76AD1 R         | TGCTAGCCATACCGGTATCCTTGCAAACGGGAATAA         | subcellular localization |
| pEAQ-DODA $\alpha$ 1 F  | CAAATTCGCGACCGGTATGGGTGTTGGCAAAGAAGT         | subcellular localization |
| pEAQ-DODA $\alpha$ 1 R  | TGCTAGCCATACCGGTGATGGAAGTGAACCTGTAGG         | subcellular localization |
| pEAQ-DODA $\alpha$ 2 F  | CAAATTCGCGACCGGTATGCTTCAGCAACTAATTAGTGGATGGC | subcellular localization |
| pEAQ-DODA $\alpha$ 2 R  | TGCTAGCCATACCGGTGCAGGAAGTGAATATGTAGGAGG      | subcellular localization |
| pEAQ-B5GT1 F            | CAAATTCGCGACCGGTATGAACATGGCTGCTGAAGATCAA     | subcellular localization |
| pEAQ-B5GT1 R            | TGCTAGCCATACCGGTAGTGCATAAACCCCTAAGCTCA       | subcellular localization |
| pEAQ-B5GT2 F            | CAAATTCGCGACCGGTATGGGTGCTCAACCTCAACAGCT      | subcellular localization |
| pEAQ-B5GT2 R            | TGCTAGCCATACCGGTGAGTTCCACCCACAGTGAGTCA       | subcellular localization |

| Primer names               | Primer sequences (5'-3')                       | Assays                   |
|----------------------------|------------------------------------------------|--------------------------|
| pEAQ-CDOPA5GT F            | CAAATTCGCGACCGGTATGGACTCTGCAACAGAGCATA         | subcellular localization |
| pEAQ-CDOPA5GT R            | TGCTAGCCATACCGGTAGCAGCTGGTCGATCCCTGCCG         | subcellular localization |
| pPZP6k90-CYP76AD1 F        | CATTCTACAACCTACATCTAGAAATGGATAGCCCAACCCTCTC    | Overexpression           |
| pPZP6k90-CYP76AD1 R        | AGCTTGCATGCCAATTCTAGATCAATCCTTGCAAACGGGAATAA   | Overexpression           |
| pPZP6k90-DODA $\alpha$ 1 F | CATTCTACAACCTACATCTAGAAATGGGTGTTGGCAAAGAAGT    | Overexpression           |
| pPZP6k90-DODA $\alpha$ 1 R | AGCTTGCATGCCAATTCTAGATCAGATGGAAGTGAACCTGTAGG   | Overexpression           |
| pPZP6k90-DODA $\alpha$ 2 F | CATTCTACAACCTACATCTAGAAATGCTTCAGCAACTAATTAGTGG | Overexpression           |
| pPZP6k90-DODA $\alpha$ 2 R | AGCTTGCATGCCAATTCTAGATCAGCAGGAAGTGAATATGTAG    | Overexpression           |
| pPZP6k90-B5GT1 F           | CATTCTACAACCTACATCTAGAAATGAACATGGCTGCTGAAGA    | Overexpression           |
| pPZP6k90-B5GT1 R           | AGCTTGCATGCCAATTCTAGATTAAGTGCGATAAACCCCTAAGCT  | Overexpression           |
| pPZP6k90-B5GT2 F           | CATTCTACAACCTACATCTAGAAATGGGTGCTGAACCTCAACA    | Overexpression           |
| pPZP6k90-B5GT2 R           | AGCTTGCATGCCAATTCTAGATTAAGTGCGATAAACCCCTCAACT  | Overexpression           |
| pPZP6k90-CDOPA5GT F        | CATTCTACAACCTACATCTAGAAATGGACTCTGCAACAGAGCA    | Overexpression           |
| pPZP6k90-CDOPA5GT R        | AGCTTGCATGCCAATTCTAGATCAAGCAGCTGGTCGATCCCT     | Overexpression           |
| TRV2-CYP76AD1 F            | GCCTCCATGGGGATCCATGGATAGCCCAACCCTCTC           | VIGS                     |
| TRV2-CYP76AD1 R            | CTTCGGGACATGCCCCGGGTCTAAACTCCGCCATTTGG         | VIGS                     |
| TRV2-DODA $\alpha$ 1 F     | GCCTCCATGGGGATCCATGGGTGTTGGCAAAGAAGTGTC        | VIGS                     |
| TRV2-DODA $\alpha$ 1 R     | CTTCGGGACATGCCCCGGGTGTCAGCCTCAGGGTACATGAGG     | VIGS                     |
| TRV2-DODA $\alpha$ 2 F     | GCCTCCATGGGGATCCACAGCATCAGGGTTCAGC             | VIGS                     |
| TRV2-DODA $\alpha$ 2 R     | CTTCGGGACATGCCCCGGGTGTGCCAGTTCCCAGTTT          | VIGS                     |
| TRV2-B5GT1 F               | GCCTCCATGGGGATCCAGGTTGAAACAACCCGATCT           | VIGS                     |
| TRV2-B5GT1 R               | CTTCGGGACATGCCCCGGGTCTTAGATCCAATGGGCACC        | VIGS                     |
| TRV2-B5GT2 F               | GCCTCCATGGGGATCCACACATGATCCCAACCCT             | VIGS                     |
| TRV2-B5GT2 R               | CTTCGGGACATGCCCCGGGTCCAGCACAAAGCGCAAA          | VIGS                     |
| TRV2-CDOPA5GT F            | GCCTCCATGGGGATCCACCAAGCCCGAACTGAAA             | VIGS                     |
| TRV2-CDOPA5GT R            | CTTCGGGACATGCCCCGGGATACGCCGCCGTCCCATA          | VIGS                     |
| pYES3-DODA $\alpha$ 1 F    | GGGAATATTAAGCTTATGGGTGTTGGCAAAGAAGT            | expression in yeast      |
| pYES3-DODA $\alpha$ 1 R    | ATATCTGCAGAATTCTCAGATGGAAGTGAACCTGTAGG         | expression in yeast      |
| pYES3-DODA $\alpha$ 2 F    | GGGAATATTAAGCTTATGCTTCAGCAACTAATTAGTGG         | expression in yeast      |
| pYES3-DODA $\alpha$ 2 R    | ATATCTGCAGAATTCTCAGCAGGAAGTGAATATGTAG          | expression in yeast      |
| pCYP76AD1-F                | GACATAAGACTCAATTTACTTGAA                       | promoter cloning         |
| pCYP76AD1-R                | AGTTATGAAGTAAAAGATTGAGGCA                      | promoter cloning         |
| pDODA $\alpha$ 1-F         | CTATGTCTTTTGGTGAGCTGTGTTA                      | promoter cloning         |
| pDODA $\alpha$ 1-R         | CCCAGTGAGCAGAGACAACCAGGAT                      | promoter cloning         |
| pCDOPA5GT-F                | TGACTTGGTCAAAACGCTAA                           | promoter cloning         |
| pCDOPA5GT-R                | CTGCGCCATGTATGGGAGCA                           | promoter cloning         |
