# Supplementary material for: A Genome-Wide Identification Study Reveals That HmoCYP76AD1, HmoDODAα1 and HmocDOPA5GT Involved in Betalain Biosynthesis in Hylocereus
Source: MDPI journal article supplement (doi:10.3390/genes12121858), 2021-11-23
Supplement: s1 [file s1]

## *CYP76ADs*

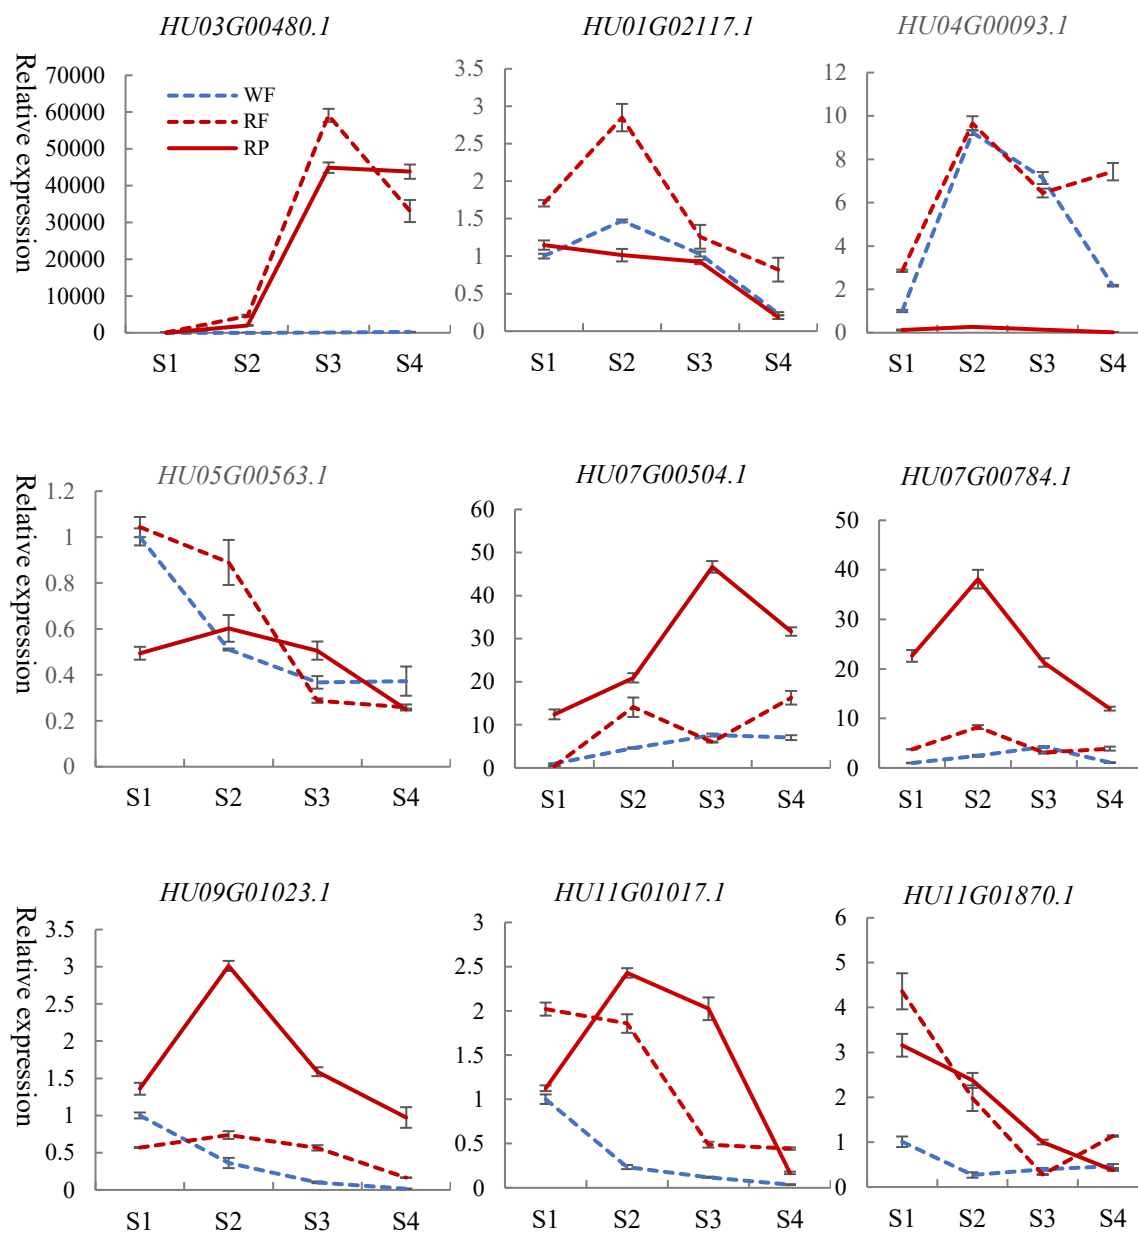

**Figure S2-1.** Expression patterns of betalain biosynthesis-related *CYP76ADs* during four fruit developmental stages of pitaya.

(RF) pulps of ‘Guanhuahong’ pitaya, (WF) pulps of ‘Guanhuabai’ pitaya, (RP) peels of ‘Guanhuahong’ pitaya.

## DODAs

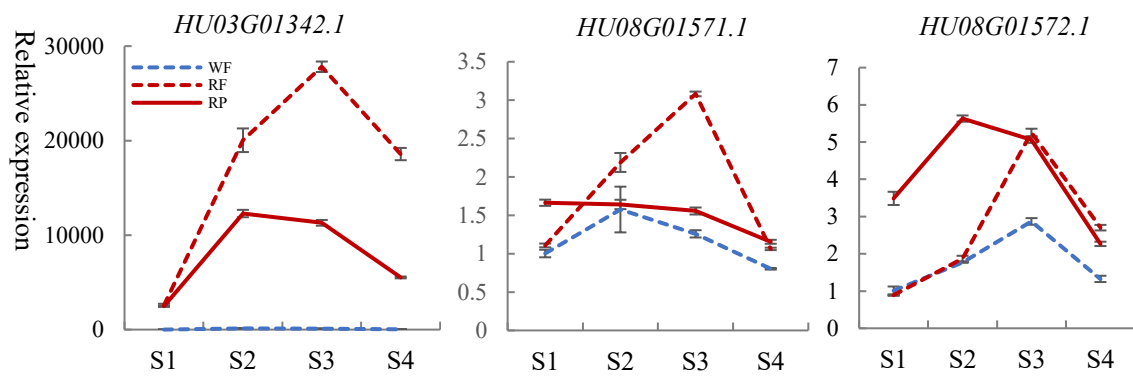

**Figure S2-2.** Expression patterns of betalain biosynthesis-related *DODAs* during four fruit developmental stages of pitaya.

(RF) pulps of 'Guanhuahong' pitaya, (WF) pulps of 'Guanhuabai' pitaya, (RP) peels of 'Guanhuahong' pitaya.

## GTs

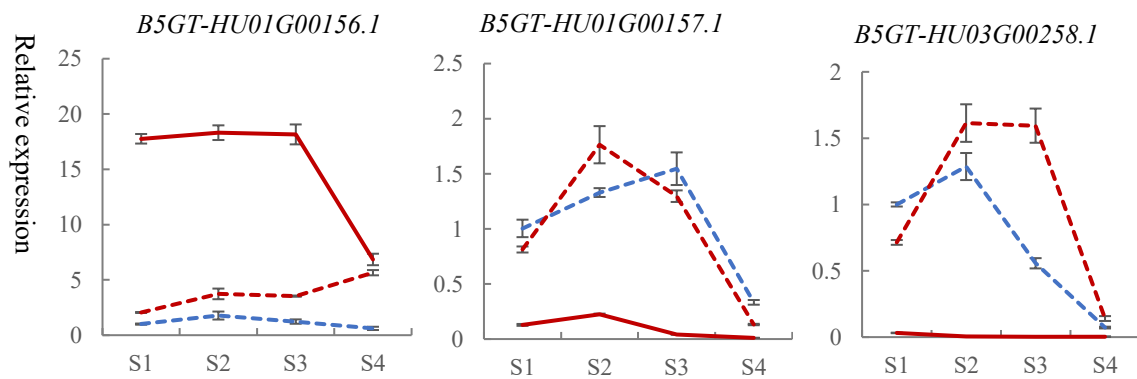

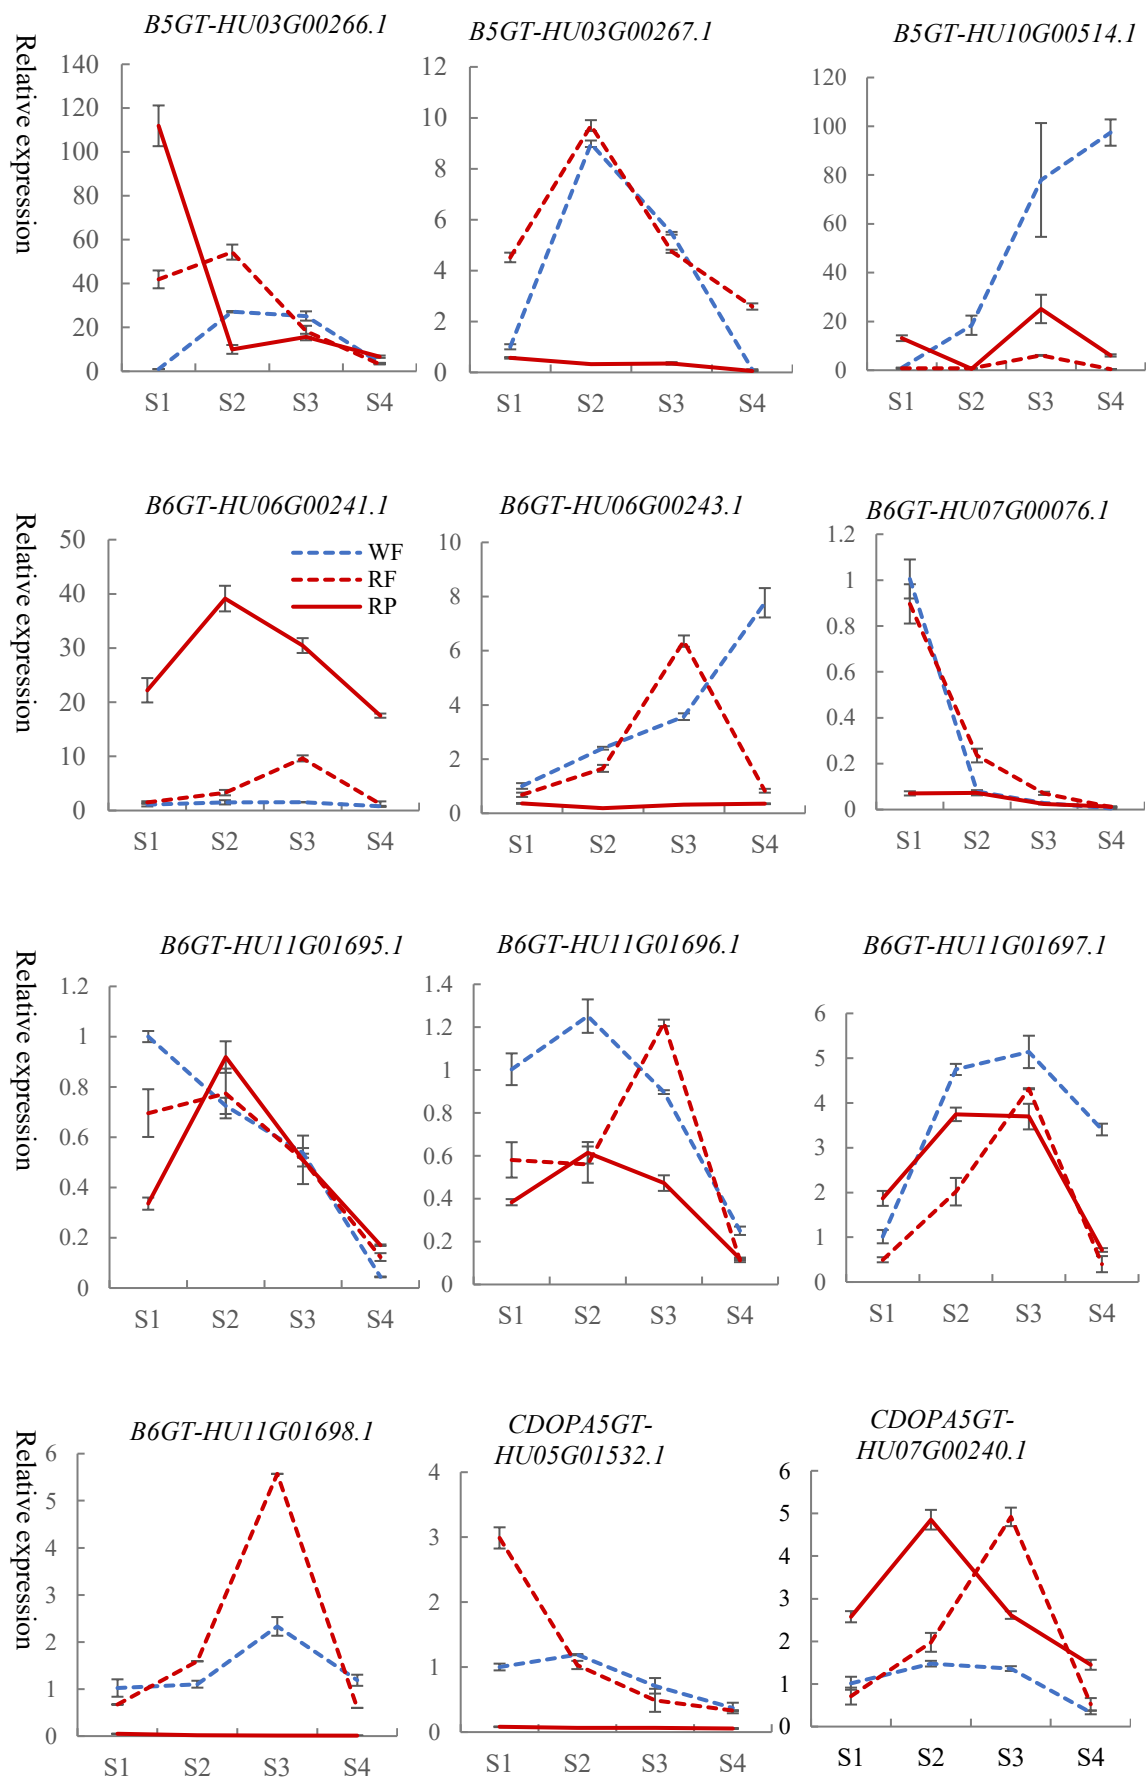

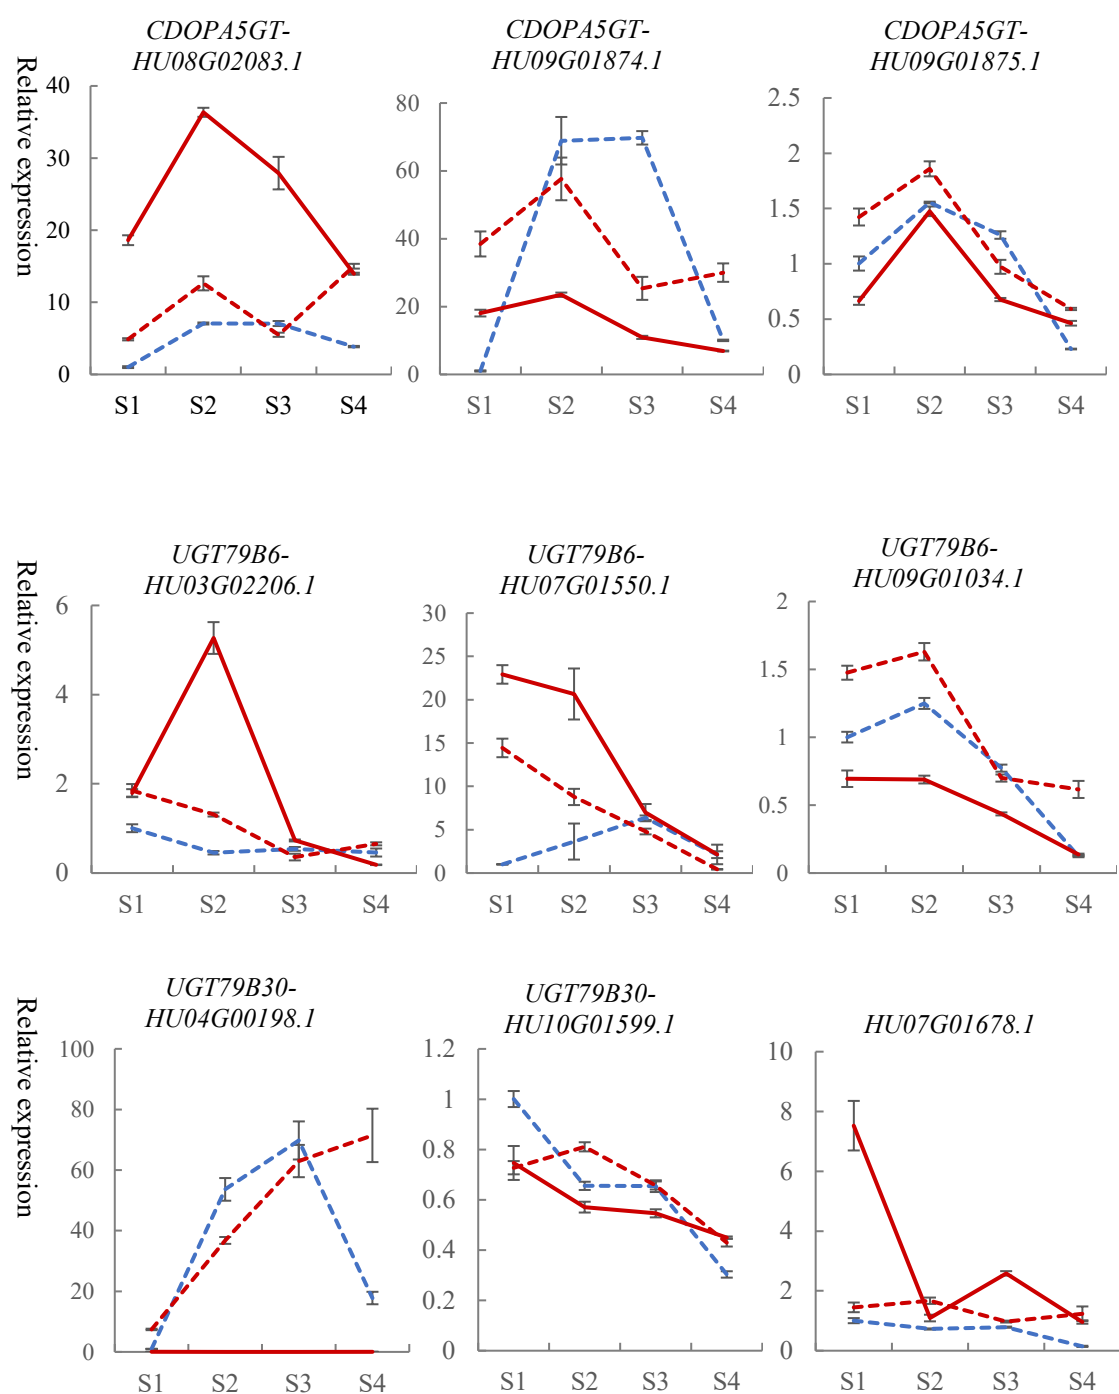

**Figure S2-3.** Expression patterns of betalain biosynthesis-related *GTs* during four fruit developmental stages of pitaya.

(RF) pulps of ‘Guanhuahong’ pitaya, (WF) pulps of ‘Guanhuabai’ pitaya, (RP) peels of ‘Guanhuahong’ pitaya.
