# Supplementary material for: A Genome-Wide Identification Study Reveals That HmoCYP76AD1, HmoDODAα1 and HmocDOPA5GT Involved in Betalain Biosynthesis in Hylocereus
Source: MDPI journal article supplement (doi:10.3390/genes12121858), 2021-11-23
Supplement: s1 [file s1]

**Text S1.** cDNA and amino acid sequences of genes for qPCR. PCR products were marked red color. The sequences from *H. monacanthus* and *H. undatus* were named ‘Gene ID-R’, and ‘Gene ID-W’, respectively.

#### CYP76AD $\alpha$

> HU03G00480.1-R

ATGGATAGCCCAACCCCTCTCGCTTTTCATCTTTGCCTCAATCTTTTACTTCATAACTTTTCAAATTGTGA  
AGCTAGGGTTTAATGTGGTCATGACCTCTAAAAAAACCAAAGAAGAAGACCCCCCTTACCTCCGGG  
CCCCAAGCCATTGCCCATCATAGGCAATGTGCTCGAGCTCGGGCCGAAGCCACACCGCTCGTTCGCCG  
ACCTAGCCAAGGTCCATGGTCCACTCATGTCCCTCCGGCTAGGTAGTGTGACCACGATTATCGTGTTCAT  
CCTCTGATGTTGCCAAAGAAATGTTCCCTTAAAAATGACCAACCCTTGA **GCTCCAGCCGAACCATACCC**  
**AACTCAGTCACGGCTGGGGATCACCATGCTGACCATGTCTTGCTCCAGTCTCCCCCAAATGGCG**  
**GAGTTTTAGGAAGAT**CACCACCTTCCACCTTCTCTCCCCCAGCGCCTCGATGCTTGCTCTAGCCTTAG  
GCAAGCCAAGGTGCAGCAGCTATTCGAGTACGTTCTGGAATGTTCTAGAACCGGCCAGGCCGTCGAT  
ATAGGCAAGGCTGCTTTCACGACGTCCCTTAACTTGTTGTCCAAGCTGTTTTTTCTTTAGAGTTGGCT  
CACCATAGATCTAGCAAGTCTCAAGAGTTTAAGGACTTAATTTGGGATATTATGGAGGATATTGGGAAG  
CCTAATTACGCGGATTATTTCCCATGCTTAAAGTACTTTGACCCATGTGGAATACGACGTCGTTTGCA  
AATAGTTTTGAGAAATTAATTGAGGTCTTTCAAGGTATTATTCGTCAAAGGCTATCCCTGTCATCTGGCT  
CTCATACTCATAATGATGTGTTAGATGTTCTTCTTCAATTGTACAACCAAGAGGAACCTACCATGGACG  
AGATAAACCATCTGCTCGTGGATATATTTGATGCCGGAACAGACACCACTTCCAGTACATTTGAATGGG  
CCATGGCTGAGTTAATTAATAATCCGACGATGATGGAGAAAGCTCAAGCTGAAATCAAAGTGTTTCTT  
GGGAAACAGTCGCATATTCAAGAGTCCGATATCCCAAATTCCTTATTTGCGGGCAATTATCAAAGA  
AACATTGCGTCTACACCCTCCTACTGTATTCTCCTACCTCGTAAGGCTGAGACCGATGTGGAACCTCTA  
TGGCTACACCGTACCAAAAAATGCACAAATACTGGTGAACCTTGTTGGGCCTTAGGTGAGACCCCAA  
GTTTGGGAAAACCCAGAGGTGTTCTTACCTGAAAGGTTCTGACTTGCGACATCGATGTTAAAGGAA  
GAGATTTTGGACTACTGCCTTTTGGGGCAGGAAGGCGAATATGTCCTGGGATGAATTTGGCGTACAGA  
ATGCTGACCTTAATGCTCGCTACGCTTCTACAATCGTTTGATTGGAAACTCCCAAATGAGATGAACTCC  
AAGAATTTGGACATGGATGAAAAGTTTGAATAGCATTGCAAAAGACTAAACCCCTTGAAATTATTC  
CGTTTGCAAGGATTGA

MDSPTLSLFIFASIFYFITFQIVKLGFNVVMTSKKTKRRRPPLPPGPKPLPIIGNVLELGPKPHRSFADLAKV  
HGPLMSLRLGSVTTHIVSSSDVAKEMFLKNDQPLSSSRTPNSVTAGDHHMLTMSWLPVSPKWRSFRKITT  
FHLLSPQRLDACSSLRQAKVQQLFEYVLECSRTGQAVDIGKAAFTTSLNLLSKLFFSLELAHHRSSKSQEF  
KDLIWDIMEDIGKPNYADYFPCLKYFDPCGIRRLANSFEKLIEVFQGIIRQLSLSSGSHTHNDVLDVLLQ  
LYNQEELTMDEINHLLVDIFDAGTDTTSSTFEWAMAELIKNPTMMEKAQAEIKVVLGKQSHIQESDIPKLP  
YLRAIIKETLRLHPPTVFLLPRKAETDVELYGYTVPKNAQILVNLWALGRDPKVWENPEVFLPERFLTCDI  
DVKGRDFGLLPFGAGRRIICPGMNLAYRMLTLMLATLLQSFDWKLPNEMNSKNLDMDEKFGIALQKTKP

LEIIPVCKD

> HU03G00480.1-W

ATGGATAGCCCAACCCTCTCGCTTTTCATCTTTGCCTCAATCTTTTACTTCATAACTTTTCAAATTGTGA  
AGCTAGGGTTTAATGTGGTCATGACCTCTAAAAAAACCAAAGAAGAAGACCCCCCTTACCTCCGGG  
CCCCAAGCCATTGCCCATCATAGGCAATGTGCTCGAGCTCGGGCCGAAGCCACACCGCTCGTTCGCCG  
ACCTAGCCAAGGTCCATGGTCCACTCATGTCCCTCCGGCTAGGTAGTGTGACCACGATTATCGTGTGCAT  
CCTCTGATGTTGCCAAAGAAATGTTTCCTTAAAAATGACCAACCCTTGA**GCTCCAGCCGAACCATACCC**  
**AACTCAGTCACGGCTGGGGATCACACATGCTGACCATGTCTTGCTCCAGTCTCCCCCAAATGGCG**  
**GAGTTTTAGGAAGAT**CACCACCTTCCACCTTCTCTCCCCCAGCGCCTCGATGCTTGCTCTAGCCTTAG  
GCAAGCCAAGGTGCAGCAGCTATTCGAGTACGTTCTGGAATGTTCTAGAACCGGCCAGGCCGTCGAT  
ATAGGCAAGGCTGCTTTCACGACGTCCCTTAACTTGTTGTCCAAGCTGTTTTTTCTTTAGAGTTGGCT  
CACCATAGATCTAGCAAGTCTCAAGAGTTTAAGGACTTAATTTGGGATATTATGGAGGATATTGGGAAG  
CCTAATTACGCGGATTATTTCCCATGCTTAAAGTACTTTGACCCATGTGGAATACGACGTCGTTTGGCA  
AATAGTTTTGAGAAATTAATTGAGGTCTTTCAAGGTATTATTCGTCAAAGGCTATCCCTGTCACTGGCT  
CTCATACTCATAATGATGTGTTAGATGTTCTTCTTCAATTGTACAACCAAGAGGAACTCACCATGGACG  
AGATAAACCATCTGCTCGTGGATATATTTGATGCCGGAACAGACACCACTTCCAGTACATTTGAATGGG  
CCATGGCTGAGTTAATTAATAATCCGACGATGATGGAGAAAGCTCAAGCTGAAATCAAAGTGGTTCTT  
GGGAAACAGTCGCATATTCAAGAGTCCGATATCCCAAATTCCTTATTTGCGGGCAATTATCAAAGA  
AACATTGCGTCTACACCTCCTACTGTATTCCTCCTACCTCGTAAGGCTGAGACCGATGTGGAACCTCTA  
TGGCTACACCGTACCAAAAAATGCACAAATACTGGTGAACCTTGTTGGGCCTTAGGTTCGAGACCCCAA  
GTTTGGGAAAACCCAGAGGTGTTCTTACCTGAAAGGTTTCTGACTTGCGACATCGATGTTAAAGGAA  
GAGATTTTGGACTACTGCCTTTTGGGGCAGGAAGGCGAATATGTCCTGGGATGAATTTGGCGTACAGA  
ATGCTGACCTTAATGCTCGCTACGCTTCTACAATCGTTTGATTGGAAACTCCCAAATGAGATGAACTCC  
AAGAATTTGGACATGGATGAAAAGTTTGAATAGCATTGCAAAAGACTAAACCCCTTGAAATTATTC  
CGTTTGCAAGGATTGA

MDSPTLSLFIFASIFYFITFQIVKLGFNVVMTSKKTKRRRPPLPPGPKPLPIIGNVLELGPKPHRSFADLAKV  
HGPLMSLRLGSVTTHIVSSSDVAKEMFLKNDQPLSSSRTIPNSVTAGDHHMLTMSWLPVSPKWRSFRKITT  
FHLLSPQRDLACSSLRQAKVQQLF EYVLECSRTGQAVDIGKAAFTTSLNLLSKLFFSLELAHHRSSKSQEF  
KDLIWDIMEDIGKPNYADYFPCLKYFDPCGIRRLANSFEKLIEVFQGIIRQLSLSSGSHTHNDVLDVLLQ  
LYNQEELTMDEINHLLVDIFDAGTDTTSSTFEWAMAELIKNPTMMEKAQAEIKVVLGKQSHIQESDIPKLP  
YLRAIIKETLRLHPPTVFLLPRAETDVELYGYTPKNAQILVNLWALGRDPKVWENPEVFLPERFLTCDI  
DVKGRDFGLLPFGAGRRICPGMNLAYRMLTLMLATLLQSFDWKLPNEMNSKNLDMDEKFGIALQKTKP  
LEIIPVCKD

CYP76AD $\gamma$

>HU01G02117.1-R

ATGCCTTCCTTTGAGGCTGCTGTGCCCCCTGATCTTACTCCTTCCGCTCCTATGGGTATTTTTCAAGGCA  
AAGACCCGAAAACCCGGCCCAAACCTTGCCACCAGGCCCCCGGCCGCTCCCGATAATCGGAAACCTGC  
ACATGTTGGGCCAGAACCCGCATCGAGCTTTAGCAGAATTGGCCCAAAGTACGGCCCAATCATGTC  
GCTCCGCCTGGGTACGTGCCTGCCATAGTTGTATCGTCAGCTCAGGCGGCCGAGCTCTTCCTTAAGC  
AACATGATGCCCCTTTTGCCTACCGGCCCGTGCTACTAGTTTGGGATCACATGGTCTACGGAGCCAAG  
GACGTGGCATTACGCCTTATGGGGATTACTGGCGGCGTGTGAGGAAGATGTGCGTCATCCACCTCCT  
TAGCGCCGCCAAGGTGGCCGGGTTCGAGGGGGCTGAGGAGGGCGGAGATCGAGGCAGCCGTGGGGCG  
GCTGGCAGAGGCTGCGGTGGCGCGTGAGGTGGTGGATGTGGGGGAGAGAGTGGGGGAGTTGATTGA  
AGACATAGTGTTTAAGATGTTGATTGGAAAGGGGAAGGAGGATAAGAGGTATGATTTACAGGGGAGTG  
ATTCAGGAGGCTTTGGCTCTTGCTGGGGCATTAACTTGGCTGATTTTATTCCTTGGCTTGCCCCGCTT  
GACTTGCAGGGACTAATGCGAAGGACAAAAGCTGCAAGGAAGGCCACAGATGAAATATTTGATAACA  
TTATTGAGGACCATCTCAAAGAAGAAGATTTTGGACAAAATAGGGACATTATTGGTTTGTGCTATCTC  
TTATGCATAACCCTACAAACGAGTTGCACTCCTCCTCATTGGCCTAGACAATGTCAAAGCTCTTATGT  
TCGACTTGTTTGTGCTGGTGGCATCGACACCACATACGTCGCCATAACATGGGTCCTCTCAGCACTCATT  
AGCACCCACGGGTGATGAGACTCGTCCAAGATGAGCTTGACTCCATAGTTGGACGGGAGAGAATGCT  
AGTGGAATCAGACTTGTCGAAATTAACCTATTTAGACATGGTGATAAAAGAGACTTTTAGGCTTTACCC  
TGCAGGGCCACTATCGGTGCCTCATGAGTCTATGGAGGATGTTATTGTAAATGGGTTTATGATACTCAA  
AAAGTCAAGGGTTATTATAAATGTTTGGGCAATTGGTCGAGACCCAAATGTATGGTCAGAAAATGCTG  
AGGAGTTTTACCCAGAGAGATTTATAGGTAGGAATATCGATGTTTCGAGGACTGCATTTTGAGTTGATCC  
CATTTGGAGCTGGGCGAAGAGAGTGTCTTGGGATGCATTTGGCTTTGATCCATGTCAAGCTAGTTGTT  
GCTCACCTGGTACATTGTTTTGATTGGGAGCTCCCCAATGGAATGCATCCCGATGATGTGGACATGATG  
GAGAAATTCGGGCTGTCAATGCCAAGAGCTAATAAGTTGTCAGCGATACCTCGTTATCGCTTA

MPSFEAAVPLILLPLLVVFFKAKTRKPGPNLPPGPRPLPIIGNLHMLGQNPHERALAEQAQKYGPIMSLRL  
GHVPAIVVSSAQAAELFLKQHDAPFAYRPVLLVWDHVMVYGAKDVAFTPYGDYWRRVRKMCVHLLSAA  
KVAGFEGLRRAEIEAAVGRLAEEAAVAREVVVDVGERVGELIEDIVFKMLIGKGKEDKRYDFRGVIEALAL  
AGAFNLADFIPWLAPLDLQGLMRRTKAARKATDEIFDNIIEDHLKEEDFGQNRDIIGLLLSLMHNPTNELH  
SSSFGLDNVKALMFDLFAGGIDTTYVAITWVLSALIKHPRVMRLVQDELDSIVGRERMLVESDLSKLTLYLD  
MVIKETFRLYPAGPLSVPHEMEDVIVNGFMILKKSRIINVWAIGRDPNVWSENAEEFYPERFIGRNIDVR  
GLHFELIPFGAGRRECPGMHLALIHVKLVVAHLVHCFDWELPNGMHPDDVDMMEKFGLSMPRANKLSAI  
PRYRL

>HU01G02117.1-W

ATGCCTTCCTTTGACTTTGAGGCTGCTGCGCCCCTGATCTTACTCCTTCCGCTCCTATGGGTATTTTTCA  
AGGCAAAGACCCGAAAACCCGGCCCAAACCTTGCCACCAGGCCCCCGGCCGCTCCCGATAATCGGAA  
ACCTGCACATGTTGGGCCAGAACCCGCATCGGGCTTTAGCAGAATTGGCCCAAAGTACGGCCCAAT  
CATGTCGCTCCGCCTGGGTACGTGCCTGCCATAGTTGTATCGTCAGCTCAGGCGGCCGAGCTCTTCC

TTAAGCAACATGACGCCCCCTTTGCCTACCGGCCCCGTGCTACTAGTTTGGGATCACATGGTCTACGGA  
GCCAAGGACGTGGCATTACGCCTTATGGGGATTACTGGCGGCGTGTGAGGAAGATGTGCGTCATCC  
ACCTCCTTAGTGCCGCCAAGGTGGCCGGGTTCGAGGGGCTGAGGAGGGCGGAGATCGAGGCAGCCG  
TGGGGCGGCTGGCAGAGGCTGCGGTGGCGCGTGAGGTGGTGGATGTAGGGGAGAGAGTGGGGGAGT  
TGATTGAAGACATAGTGTTTAAGATGTTGATTGGAAAGGGGAAGGAGGATAAGAGGTATGATTTCAGG  
GGAGTGATTGAGGAGGCTTTGGCTCTTGCTGGGGCATTAACTTGGCTGATTTTATTCCTTGGCTTGCC  
CCGCTTGACTTGCAGGGACTAATGCGACGGACAAAAGCTGCAAGGAAGGCCACAGATGAAATATTTG  
ATAACATTATTGAGGACCATCTCAAAGAAGAAGATTTTGGACAAAATAGGGACATTATTGGTTTGTTC  
TATCTCTTATGCATAACCTACAAACGAGTTGCACTCCTCCTCATTGGCCTAGACAATGTCAAAGCTC  
TTATGTTGCACTTGTGTGCTGGTGGCATCGACACCACATACGTCGCCATAACATGGGTCTCTCAGCAC  
TCATTAAGCACCCACGGGTGATGAGACTCGTCCAAGATGAGCTTGACTCCATAGTTGGACGGGAGAG  
AATGCTAGTGGAATCAGACCTGTCGAAATTAACCTATTTAGACATGGTGATAAAAGAGACTTTTAGGC  
TTTACCCTGCAGGGGCCACTATCGGTGCCTCATGAGTCTATGGAGGATGTTATTGTAAATGGGTTTATGAT  
ACTCAAAAAGTCAAGGGTTATTATAAATGTTTGGGCAATTGGTCGAGACCCAAATGTATGGTCAGAAA  
ATGCTGAGGAGTTTTACCCAGAGAGATTTATAGGTAGGAATATCGATGTTTCGAGGACTGCATTTTGAGT  
TGATCCCATTGGAGCTGGGCGAAGAGAGTGTCTGGGATGCATTTGGCTTTGATACATGTCAAGCTA  
GTTGTTGCTCACCTGGGACTAACTCGAAAGATTAAAGCTGTAAGTAAGGTTGCAGATGAAATGGCTG  
AGAATATAATTGAGGATCATCTCAAAGGAGAAGATTTTGGACAACAAAGGGACATTGTAGGTGCTATG  
CTAGCCACAATGGCGAACCCCAACAGCGAGTTCTTTTCTACTTTTGATCGAGAAAATGTTAAAGGCAT  
CATGCTTGACTTATTTGTTGGTGGGATTGACTCATCTCTCAAACCATTATGTGGGCACTCTCGGCACT  
AACCAAGCATCCAAGAGTGATGAAGCTCCTGCAAGAAGAGCTAGATGCAAAAATCGGGAGACATAG  
AATGGTGTGGAATCAGACTTGCAGAAATTAACCTATTTAGACATGGTGGTGAAGGAGACTTTTAGGC  
TTCACCCTGTGGGACCACTGTTAGTTCCCATGAGTCTATGGAGGATGTTATCGTAGATGGGTATATGA  
TTCCGAAGAAATCAAGGGTTATCATCAACTTTTATGCTATTGGGCACGATCCCAATGTATGGTCGGAAA  
ACGTAGAGGACTTTTATCCAGAGAGATTTATGGGTAGAGAGACTGACGTCCGAGGGCAAGATTTTGA  
ATTAATCCCATTGGCGCAGGACGAAGAGGGTGCCCGGGAATACATTTGGGTTTGATCACAGTGAAAA  
TAGTGTTAGCTCAACTGGTACATTGTTTTAATTGGGAGCTCCCAAATGGTATGCGGCCTGAAGAAGTT  
GACATGACTGAGGAGTTCGGGTAGCAATGTCTAGAGTTAATAAGTTGTTAGCTATACCATCTTATCGC  
TTATTACTCATTCTTAAGTACCATTGA

MPSFDFEAAAPLILLPLLLWVFFKAKTRKPGPNLPPGPRPLPIIGNLHMLGQNPHERALAEALQKYGPIMSL  
RLGHVPAIVSSAQAAELFLKQHDAPFAYRPVLLVWDHVMVYGAKDVAFTPYGDYWRRVRKMCVHLLS  
AAKVAGFEGLRRAEIEAAVGRLEAAVAREVVDVGERVGEIIEDIVFKMLIGKGKEDKRYDFRGVIEAL  
ALAGAFNLADFIPWLAPLDLQGLMRRTKAARKATDEIFDNIIEDHLKEEDFGQNRDIIGLLLSLMHNPNE  
LHSSSFGLDNVKALMFDLFAGGIDTTYVAITWVLSALIKHPRVMRLVQDELDSIVGRERMLVESDLSKLT  
LDMVIKETFRLYPAGPLSPHESMEDVIVNGFMILKKSRIINVWAIGRDPNVWSENAEEFYPERFIGRNID  
VRGLHFELIPFGAGRRECPCGMHLALIHVKLVVAHLGLTRKIKAVSKVADEMAENIIEDHLKGEDFGQQRDI  
VGAMLATMANPNSEFFSTFDRENVKGIMLDLFGGIDSSLQTIMWALSALTKHPRVMKLLQEELDAKIGR  
HRMVLESDLRKLTYLDMVVKETFRLHPVGPLLVPHESMEDVIVDGYMIPKKSRIINFYAIGHDPNVWSE

NVEDFYPERFMGRETDVRGQDFELIPFGAGRRGCPGIHLGLITVKIVLAQLVHCFNWELPNGMRPEEVDM  
TEEFLAMSRVNKLLAIPSYRLLLLILKYH

>HU04G00093.1-R

ATGGATACATCAGTTACTATAGTTGAGTGGGCCATGGCAGAGATGCTGCGACATCCTAAGGTAATGGAGGA  
AGTCCAAGAAGAATTGGCCAAGATTGTGGGATTAAATAGTACTGTCTGAAGAGGCTCATTTGTCCGAGTTGA  
AGTACCTGAAAGCCGTTGTGAAGGAGACACTTCGTTTGCCTCGCCTCTACCTCTCCTTGTTCCTCCATTGTT  
CGAGCAAGCCTACCACTGTAGGAGGATATATGATACCAAAGGGCTCTCAGGTCTTCCTTAATGTTTCGAGCA  
ATTCAAACAGACCCGCAGCTTTGGGAAGCTCCATTAGAGTTTCAACCTGGGCGGTTTATGAGGGGCTCCTC  
TGCTGAGGCAGTTGACTACTGGGGTAACCACCTTCAGTTTCTTCCATTTCGGCTCCGGGAGGAGAATGTGTC  
CTGGTATTCTCTAGCAGAGAGAACAGTCATGCATGTCTTAGCTTCACTGTTGCATGCTTTTGAGTGGTCAT  
TACCAAACGGTGTGTAAGATGTGAATCTCTCTGAGAAATTTGGAATCGTTGTGAAAAAGAAAAACCAT  
ACTGGCCGTCCCAAACTGGCGAGGACCTATGGTCCCATCTTTAAGGTCCGGCTAGGAACCAAGACTTGC  
ATTGTGATCAGCTCACCTACTTTCTCAAAGAGGTGGTGCGAGACCAAGATGTCACTTTTGCTAACCGTGA  
TCCTACGGCTGTTGCTATTACATGCTTTTATGGGGGATCCGATATTACTTTACCAATTACGGCGCTGAATGG  
CGAAAGATGAGGAAAATATTGGCCAGTGAAATGCTAAGTAATTCTAGCCTCGATTCTACTTATCATCTCAGG  
AAACAACAGGTGAAGAAAATGATAGCAGATACATACGAAAAGGCCGGTGAAGTAGTTGATATAGGTGAAT  
TGGCTTTTCTCACCATTATGAATGCTACGATGAGCATGGTATGGGGACAAACACTTAAAGGCAACCAGGGT  
TATGCTGTGAAGTCTGAGTTTCGAGATGTGATAAGAGAATTCATGGAGCTGTTAGGGGCACCAAATATTT  
GGACCTTTTCCCTTTGCTTGCTAGGTTTGATTGCAAGGAATAAAGTGCAAAGCGGAGATTATCTCCCGCC  
AATTTAATGAGATCCTGGATTCTGCCATAAATATTCACAACTGTGGAGAAAAAAGTGGGCAGAAAGATTTT  
CTGGGATACCTCTTACCACTCACCAAGTGCGAAGATCCTACAACATCGCTCACCTTGGTTCAAGCAAAGGC  
CTTGCTCATTGACATTATCATTGGGGGAATGGATACAACAGTTACTGCAGTCGAGTGGGCTATGGTGCTGAT  
GCTGAAACATCCGAAGGTAATGAGGAAAGTCCAGCTCTACCACGTTTCGATCTTAGACACATTCTTAATCC  
TTTCTCTTATAAGTACTGCTAGATTTCACTGGCTTAGCTGCATTACTTTGTTGATCCCCCTCTCATGCACGTTA  
ACTCACATATTGTATGAAATGGCGTCATGGTGGTGGGATAC**TAGCGATGAACCAACGAAGCCTCTCTTAA**  
**AATCTTCATTGCCTTGTTCTTCTTGATCATTCTTTGGTTCATTTCCCTGCTCTGTAAACAAAACAAGGCGACA**  
**CCTCCCCTGCCTCCTGGACCCAATGGCTTGCTTTTCGTTGGATATCTTCCTTTCTTGGGTTCTG**ATCTTCTAT  
GCTCTTTTACCAACTGGCGAGGACCTATGGTCCCATCTTTAAGGTCCGGCTAGGAACCAAGACTTGCAAT  
GTGATCAGCTCGCCCTCCTTTCTCAAAGAGGTGGTGCGAGACCAAGATGTCACTTTTGCCAACCGTGATCC  
TACTGTTGTTGCTGTTACATGCATATATGGGGGATCCGATATTGCTTTCACCAATTACGGCCCTGAATGGCGA  
AAGCTGAGGAAAATCTTGGCCAGTGAAATGCTAAGTAATTCTAACCTCGATTCTGCTTATCATTTTCAGGAA  
ACAACAGGTGAAGAAAATGATAGCAGATACATATGACAAGGCCGGTGGAGCAGTTGATGTAGGTGAATTG  
GCTTTTCTCACCATTATGAATTCTATGATGAGCATGGTATTGGGACAAACACTTGAAGGCAACCAGGGTTAT  
GCTGTAAAGTCTGAGTTTCGAGACGTGATAAGAGAATTCATGGAGCTGTTAGGGGCAGCAAATATTTTCGGA  
CCTGTTCCCTTTGCTTGCTAGGTTTGATTGCAAGGAATAAAGTGCAAAGCAGAGATGATCTCCCACCAATT  
TGATGAGATCCTGGATTCTGCCATAAATATTCACAACTGTGGAGAAAAAAGTGGGCAGAAAGATTTTCTGG  
GATGCCTCTTAGCACTTACCAAGCGCGAAGATCCTACAACATCGCTCACCTTGGTTCAAGCAAAGGCCACG

ATCATTGACATTATTATTGGGGGAGTGGAGACAACAGTTAGTACAGTCGAGTGGGCTACGGTGCTGATGCT  
GAAACATCCAAAGGTAATGAGGAAAGTCCAAGAAGAATTAGCTGAGATTGTGGGACTAAATACTTCTGTT  
GAAGAGGTTTCATTTTCCAAAGTTGAAGTACCTGAAAGCTGTTGTGAAGGAGACCTTACGTTTGCACCCGC  
CAATACCTTTTCCTCGTTCCCCATTGTCCAAGCAAATCTACCACTGTAGGAGGATATACCATACCAAAGGGTG  
CTCAGATCTACCTCAATTTGTTTGCTATGCAAAAGGACGCGCAACTTTGGGGAGATCCTCTAGAGTTTAAA  
CCCGAGAGGTTCTTAAAGGGCTCATCAGCGGGGGGCTTGGACTACTCAGGCAACCATCTTCAGTATCTTCC  
ATTTGGGTCAGGGCGAAGAGCATGCCCTGGCGTGCCTTTGGCAGATAGGATGTTGATGCTTGTCTTGGCTT  
CACTTTTGCATGCTTTTGAAGTGGTCATTACCTAATGGAGTTGAGGATGTCGACCTCTCTGAGAGATTGGA  
TCGTCGTGAAAAAATCAAAACCTTTACTCGCTATCCCTTGTCCCAGACTCTCCAGCTTGGAGCTCTATTCA  
TCTCAGAATAG

MDTSVTIVIEWAMAEMLRHPKVMEEVQEELAKIVGLNSTVEEAHLSELKYLKAVVKETLRLHSPLPLLVP  
HCSSKPTTVGGYMIPKGSQVFLNVRAIQTDPLWEAPLEFQPGFRMRGSSAEAVDYWGNHLQFLPFGSG  
RRMCPGIPLAERTVMHVLASLLHAFEWSLPNGVEDVNLSEKFGIVVKKEKPLLAVPKLARTYGPIFKVRL  
GKTKCIVISSPYFLKEVVRDQDVTFANRDPTAVAITCFYGGSDITFTNYGAEWRKMRKILASEMLSNSLD  
STYHLRKQQVKKMIADTYEKAGEVVDIGELAFLLTIMNATMSMVWGQTLKGNQGYAVKSEFRDVIREFM  
ELLGAPNISDLFPLLARFDLQGIKCKAEIISRQFNEILDSAINIHNCGEKSGQKDFLGYLLPLTKCEDPTTSLT  
LVQAKALLIDIIIGGMDTTVTAVEWAMVLMMLKHPKVMRKVQLYHVSILDTFLILSLISTARFHWLSCITLLI  
PLSCTLTHILYEMASWWWDTSDPENEASLKIFIALFFLIILWFISLLCKQNKATPPLPPGPNGLPFVGYLPFL  
GSDLLCSFTQLARTYGPIFKVRLGKTKCIVISSPSFLKEVVRDQDVTFANRDPTVVAVTCIYGGSDIAFTNY  
GPEWRKLRKILASEMLSNSNLDSAYHFRKQQVKKMIADTYDKAGGAVDVGELAFLLTIMNSMMSMVLGQ  
TLEGNGQGYAVKSEFRDVIREFMELLGAANISDLFPLLARFDLQGIKCKAEMISHQFDEILDSAINIHNCGEK  
SGQKDFLGLLALTKREDPTTSLTLVQAKATIIDIIIGGVETTSTVEWATVLMMLKHPKVMRKVQEELAEIV  
GLNTSVEEVHFPKLKYLKAVVKETLRLHPPIPFLVPHCPSKSTTVGGYTIPKGAQIYLNLFAMQKDAQLW  
GDPLEFKPERFLKGSSAGGLDYSGNHLQYLPFGSGRRACPGVPLADRLMLMLVLASLLHAFEWSLPNGVE  
DVDLSERFGIVVKKSKPLLAIPCPRLSSLELYSYSE

>HU04G00093.1-W

ATGGATACATCAGTTACTATAGTTGAGTGGGCCATGGCAGAGATGCTGCGACATCCTAAGGTAATGGAGGA  
AGTCCAAGAAGAATTGGCCAAGATTGTGGGATTAAATAGTACTGTCTGAAGAGGCTCATTGTCCGAGTTGA  
AGTACCTGAAAGCCGTTGTGAAGGAGACACTTCGTTTGCACCTCGCCTCTACCTCTCCTTGTTCCTCCATTGTT  
CGAGCAAGCCTACCACTGTAGGAGGATATATGATACCAAAGGGCTCTCAGGTCTTCCTTAATGTTTCGAGCA  
ATTCAAACAGACCCGCAGCTTTGGGAAGCTCCATTAGAGTTTCAACCTGGGCGGTTTATGAGGGGCTCCTC  
TGCTGAGGCAGTTGACTACTGGGGTAACCACTTCAGTTTCTTCCATTTCGGCTCCGGGAGGAGAATGTGTC  
CTGGTATTCTCTAGCAGAGAGAACAGTCATGCATGTCTTAGCTTCACTGTTGCATGCTTTTGAAGTGGTCAT  
TACCAAACGGTGTTGAAGATGTGAATCTCTCTGAGAAATTTGGAATCGTTGTGAAAAAAGAAAAACCATT  
ACTGGCCGTCCCAAACTGGCGAGGACCTATGGTCCCATCTTTAAGGTCCGGCTAGGAACCAAGACTTGC  
ATTGTGATCAGCTCACCTACTTTCTCAAAGAGGTGGTGCGAGACCAAGATGTCACTTTTGCTAACCGTGA  
TCCTACGGCTGTTGCTATTACATGCTTTTATGGGGGATCCGATATTACTTTACCAATTACGGCGCTGAATGG

CGAAAGATGAGGAAAATATTGGCCAGTGAAATGCTAAGTAATTCTAGCCTCGATTCTACTTATCATCTCAGG  
AAACAACAGGTGAAGAAAATGATAGCAGATACATACGAAAAGGCCGGTGAAGTAGTTGATATAGGTGAAT  
TGGCTTTTCTCACCATTATGAATGCTACGATGAGCATGGTATGGGGACAAACACTTAAAGGCAACCAGGGT  
TATGCTGTGAAGTCTGAGTTTCGAGATGTGATAAGAGAATTCATGGAGCTGTTAGGGGCACCAAATATTTT  
GGACCTTTTCCCTTTGCTTGCTAGGTTTGATTTGCAAGGAATAAAGTGCAAAGCGGAGATTATCTCCCGCC  
AATTTAATGAGATCCTGGATTCTGCCATAAATATTCACAACCTGTGGAGAAAAAAGTGGGCAGAAAGATTTT  
CTGGGATACCTCTTACCACTCACCAAGTGCGAAGATCCTACAACATCGCTCACCTTGGTTCAAGCAAAGGC  
CTTGCTCATTGACATTATCATTGGGGGAATGGATACAACAGTTACTGCAGTCGAGTGGGCTATGGTGCTGAT  
GCTGAAACATCCGAAGGTAATGAGGAAAGTCCAGCTCTACCACGTTTCGATCTTAGACACATTCTTAATCC  
TTTCTCTTATAAGTACTGCTAGATTTCACTGGCTTAGCTGCATTACTTTGTTGATCCCCCTCTCATGCACGTTA  
ACTCACATATTGTATGAAATGGCGTCATGGTGGTGGGATAC**TAGCGATGAACCAAACGAAGCCTCTCTTAA**  
**AATCTTCATTGCCTTGTTCTTCTTGATCATTCTTTGGTTCATTTCCCTGCTCTGTAAACAAAACAAGGCGACA**  
**CCTCCCCTGCCTCCTGGACCCAATGGCTTGCTTTTCGTTGGATATCTTCCTTTCTTGGGTTCTG**ATCTTCTAT  
GCTCTTTTACACAACCTGGCGAGGACCTATGGTCCCATCTTTAAGGTCCGGCTAGGAACCAAGACTTGCATT  
GTGATCAGCTCGCCCTCCTTTCTCAAAGAGGTGGTGCGAGACCAAGATGTCACTTTTGCCAACCGTGATCC  
TACTGTTGTTGCTGTTACATGCATATATGGGGGATCCGATATTGCTTTCACCAATTACGGCCCTGAATGGCGA  
AAGCTGAGGAAAATCTTGGCCAGTGAAATGCTAAGTAATTCTAACCTCGACTCTGCTTATCATTTCAGAAA  
ACAACAGGTGAAGAAAATGATAGCAGATACATATGACAAGGCCGGTGGAGCAGTTGATGTAGGTGAATTG  
GCTTTTCTCACCATTATGAATTCTATGATGAGCATGGTATTGGGACAAACACTTGAAGGCAACCAGGGTTAT  
GCTGTAAAGTCTGAGTTTCGAGATGTGATAAGAGAATTCATGGAGCTGTTAGGGGCACCAAATATTTTCGA  
CCTTTTCCCTTTGCTTGCTAGGTTTGATTTGCAAGGAATAAAGTGCAAAGCAGAGATGATCTCCCGCCAATT  
TGATGAGATCCTGGATTCTGCCATAAATATTCACAACCTGTGGAGAAAAAAGTGGGCAGAAAGATTTTCTGG  
GATGCCTCTTAGCACTTACCAAGCGCGAAGATCCTACAACATCGCTCACCTTGGTTCAAGCAAAGGCCACG  
ATCATTGACATTATTATTGGGGGAGTGGAGACAACAGTTAGTACAGTCGAGTGGGCTACGGTGCTGATGCT  
GAAACATCCAAAGGTAATGAGGAAAGTCCAAGAAGAATTAAGTGAAGGAGACCTTACGTTTGCACCCGCC  
TATACCTTTCCCTCGTTCCCCATTGTCCAAGCAAATCTACCACTGTAGGAGGATATACCATAACAAAGGGTGC  
TCAGATCTACCTCAATTTGTTTGCTATGCAAAAGGACGCGCAACTTTGGGGAGATCCTCTAGAGTTTAAAC  
CCGAGAGGTTCTTAAAGGGCTCATCAGCGGGGGGCTTGACTACTCGGGCAACCATCTTCAGTATCTTCCA  
TTTGGGTCAGGGCGAAGAGCATGCCCTGGCGTGCCTTTGGCAGATAGGATGTTGATGCTTGTCTTGGCTTC  
ACTTTTGCATGCTTTTGAAGTGGTCATTACCTAATGGAGTTGAGGATGTGCACCTCTCTGAGAGATTGGAAT  
CGTCGTGAAAAAATCAAAACCTTTACTCGCTATCCCTTGTCAGACTCTCCAGCTTGGAGCTCTATTCATA  
CTCAGAATAG

MDTSVTIVEWAMAEMLRHPKVMEEVQEELAKIVGLNSTVEEAHLSELKYLKAVVKETLRLHSPLPLLVP  
HCSSKPTTVGGYMIPKGSQVFLNVRAIQTDQPQLWEAPLEFQPGFRMRGSSAEAVDYWGNHLQFLPFGSG  
RRMCPGIPLAERTVMHVLASLLHAFEWSLPNGVEDVNLSEKFGIVVKKEKPLLAVPKLARTYGPIFKVRL  
GTKTCIVISSPYFLKEVVRDQDVTFANRDPTAVAITCFYGGSDITFTNYGAWRKMRKILASEMLSNSSLD  
STYHLRKQQVKKMIADTYEKAGEVVDIGELAFITMNMATMSMVWGQTLKGNQGYAVKSEFRDVIREFM

ELLGAPNISDLFPLLARFDLQGIKCKAEIISRQFNEILDSAINIHNCGEKSGQKDFLGYLLPLTKCEDPTTSLT  
LVQAKALLIDIIIGGMDTTVTAVEWAMVLMMLKHPKVMRKVQLYHVSILDTFLILSLISTARFHWLSCITLLI  
PLSCTLTHILYEMASWWWDTSDPENEASLKIFIALFFLIILWFISLLCKQNKATPPLPPGPNGLPFVGYLPFL  
GSDLLCSFTQLARTYGPIFKVRLGKTKCIVISSPSFLKEVVRDQDVTFANRDPTVVAVTCIYGGSDIAFTNY  
GPEWRKLRKILASEMLSNSNLDSAYHFRKQQVKKMIADTYDKAGGAVDVGELAFITMNSMMSMVLGQ  
TLEGNQGYAVKSEFRDVIREFMELLGAPNISDLFPLLARFDLQGIKCKAEMISRQFDEILDSAINIHNCGEK  
SGQKDFLGLLALTKREDPTTSLTLVQAKATIIDIIGGVETTSTVEWATVLMMLKHPKVMRKVQEELTEIV  
GLNTSVEDVHFPKLEYLKAVVKETLRLHPPIPFLVPHCPSKSTTVGGYTIPKGAQIYLNLFAMQKDAQLW  
GDPLEFKPERFLKGSSAGGLDYSGNHLQYLPFGSGRRACPGVPLADRLMLMLVLASLLHAFEWSLPNGVE  
DVDLSERFGIVVKKSKPLLAIPCPRLSSLELYSYSE

>HU05G00563.1-R

ATGGATTACCTGAACTTCCTGTTGTGTCTAGTACTAGCATGGGTTGCAATCTACCTCCTTCTCTCAACT  
GCAAAGAAAGGCAAAGCAGCAAATCCTAGAATCCTACCACCAGGTCCTTCCCCTCTACCCATCTTTGG  
AAACCTCTTCATTCTGGGCACCAAGCCCCATATCTCCTTGACTGAACTCGCCAGAACCTATGGTCCCC  
TCATGAGTCTCCAGCTCGGCCAAGTGCCACAGTAGTCATTTCTTCAGCTGTTGTGGCCAAGGAAGCC  
CTTCAAAAGAATGATATTTCTTCTCCAGTCGAACAGTTGGAGATGCTGTTTGTGCACTCAGCCATCA  
CCAAAGTTCAATAATCTGGTTGCCGGCAGCAGCTCAATGGAGAAATCTGCGCAAAATCTGCAACTCCC  
ATGTCTTTTCCAACAGCAGGCTAGAAAGCAGCCAAAATCTCCGAAGAGATAAGGTGAAAGATCTCAT  
TTCCCATGTCCAAAAATGCAGTGAATCTGGCATGACAGTGGATATTGGCCAGGCTGCATTTACTACTAC  
CTCAAATCTGCTATCAAACA**CTTTCTTCTCAGTGGATTGGGAGACCCAACTTCTGAATTTGCTCGCGA**  
**ATTAAAGGGGTTGTACGAGGTGTTGTGGATGAAATAGGGAAACCCAA**CTTTGCAGATTACTTCCCTC  
TCCTGAGAAACATGGATCCACAAGGCATCAGGCGGCGCATGAGCATCCACTTTGGGAAGATGTTGGG  
CCTATTCAATGACATGATTAACCAAAGGTTGCAGGGCAAGAGGCCATCAGAAGGTAATGATGTCTTGG  
ATGCATTGATGGGCTTCAATCAAGAGAAATCGGAAGAAATCGAGCAATCAAACATTCCCTCATCTATTA  
GTGGATTTATTCGCAGCCGGAAGTGAACAACATCAAGCACCTTGAATGGGCAATGACAGAAATTCT  
CCGCAACCCAGAGATACTCAAGAAAGCACAAAGCCGAGCTCGAAGAAATCATCGGAAAAGGAAACCC  
AGTCGAAGAACCAGACATTTCCCGGCTGCCATACTTGCAGGCCATCGTCAATGAAACCTTCCGATTGC  
ATCCCGCAGTGGCGCTAGTGGTGCGAAAAGTTGATTCAGATGTCAAGCTCTTCAACTACACAGTGCCC  
AAAAACGCACAAGTGTTGGTCAATTTGTGGGCAATTGGGAGAGATCCAGAGATTTGGGAGGAACCCA  
ACACATTTGAACCAGAAAGATTTCTGGGATCAGAAGTTGATGTCAAAGGTCGCGATTTTAAGCTGATT  
CCCTTTGGAGCTGGCCGTCGGATATGCCCTGGGCTGCCATTGGCAACCAGGATGATCCATTTAATGTTG  
GCTTCGCTCATTGATGGGTTTGATTGGAAGCTTGAAGCTGGGGTTTCACCTGAGAACACGGACATGGA  
GGAGAGATTTGGGCTCACTCTGGAGAAAGCGCAGCGGCTTCGTGCCATTCCCTGTACGTGTATGA

MDYLNFLCLVLAWVAIYLLLSTAKKGKAANPRILPPGPSPLPIFGNLFILGTKPHISLTELARTYGPLMSLQ  
LGQVPTVVISSAVVAKEALQKNDISFSSRTVGDVCAALSHHQSSIIWLPAAAQWRNLRKICNSHVFSNSRL  
ESSQNLRRDKVKDLISHVQKCSESGMTVDIGQAFTTTSNLLSNTFFSVDLGDPTSEFAREFKGVVRGVV  
DEIGKPNFADYFPLLNRNMDPQGIRRRMSIHFGKMLGLFNDMINQRLQGKRPSEGNDVLDALMGFNQEKS



EEIEQSNIPHLLVDLFAAGTDTTSSTLEWAMTEILRNPEILKKAQAELEEIIIGKGNPVEEPDISRLPYLQAIVN  
ETFRLHPAVALVVRKVDSDVKLFNYTVPKNAQVLVNLWAIGRDPEIWEEPNTFEPERFLGSEVDVKGRDF  
KLIPFGAGRRICPGLPLATRMihLMLASLIHGFDWKLEAGVSPENTDMEERFGLTLEKAQRLRAIPVRV

>HU05G00563.1-W

ATGGATTACCTGAACTTCCTGTTGTGTCTAGTACTAGCATGGGTTGCAATCTACCTCCTTCTCTCAACT  
GCAAAGAAAGGCAAAGCAGCAAATCCTAGAATCCTACCACCAGGTCCTTCCCCTCTACCCATCTTTGG  
AAACCTCTTCATTCTGGGCACCAAGCCCCATATCTCCTTGACTGAACTCGCCAGAACCTATGGTCCCC  
TCATGAGTCTCCAGCTCGGCCAAGTGCCACAGTAGTCATTTCTTCAGCTGTTGTGGCCAAGGAAGCC  
CTTCAAAAGAATGATATTTCTTCTCCAGTCGAACAGTTGGAGATGCTGTTTGTGCACTCAGCCATCA  
CCAAAGTTCAATAATCTGGTTGCCGGCAGCAGCTCAATGGAGAAATCTGCGCAAAATCTGCAACTCCC  
ATGTCTTTTCCAACAGCAGGCTAGAAAGCAGCCAAAATCTCCGAAGAGATAAGGTGAAAGATCTCAT  
TTCCCATGTCCAAAATGCAGTGAATCTGGCATGACAGTGGATATTGGCCAGGCTGCATTTACTACTAC  
CTCAAATCTGCTATCAAACA**CTTTCTTCTCAGTGGATTGGGAGACCCAACTTCTGAATTTGCTCGCGA**  
**ATTAAAGGGGTTGTACGAGGTGTTGTGGATGAAATAGGGAAACCCAA**CTTTGCAGATTACTTCCCTC  
TCCTGAGAAACATGGATCCACAAGGCATCAGGCGGCGCATGAGCATCCACTTTGGGAAGATGTTGGG  
CCTATTCAATGACATGATTAACCAAAGGTTGCAGGGCAAGAGGCCATCAGAAGGTAATGATGTCTTGG  
ATGCATTGATGGCCATCAATCAAGAGAAATCGGAAGAAATCGAGCAATCAAACATTCTCATCTATTA  
GTGGATTATTCGCAGCCGGAAGTGAACGACATCAAGCACCTTGAATGGGCAATGACAGAAATTCT  
CCGCAACCCAGAGATACTCAAGAAAGCACAAAGCCGAGCTCGAAGAAATCATCGGAAAAGGAAACCC  
AGTCGAAGAACCAGACATTTCTTGGCTCCATACTTGCAGGCCATCGTCAAGGAAACCTTCCGATTGC  
ATCCCGCAGTGCCGCTCGTGGTGCGAAAAGTTGATTGAGATGTCAAGCTCTTCAACTACACAGTGCCC  
AAAAACGCACAAGTGTTAGTCAATTTGTGGGCAATTGGGAGAGATCCAGAGATTTGGGAGGAACCCA  
ATACATTTGAACCAGAAAGATTTCTGGGATCAGAAGTTGATGTCAAAGGTCGCGATTTTAAGCTGATT  
CCCTTTGGAGCTGGCCGTCGGATATGCCCTGGGCTGCCATTGGCAACCAGGATGATCCATTTAATGTTG  
GCTTCGCTCATTGATGGGTTTGATTGGAAGCTTGAAGCTGGGGTTTCACCTGAGAACACGGACATGGA  
GGAGAGATTTGGGCTCACTCTGGAGAAAGCGCAGCGGCTTCGTGCCATTCTGTACGTGTATGA

MDYLNFLCLVLAWVAIYLLLSTAKKGKAANPRILPPGPSPLPIFGNLFILGTKPHISLTELARTYGPLMSLQ  
LGQVPTVVISSAVVAKEALQKNDISFSSRTVGDVAVCALSHHQSSIIWLPAAQWRNLRKICNSHVFSNSRL  
ESSQNLRRDKVKDLISHVQKCESGMTVDIGQAFTTTSNLLSNTFFSVDLGDPTSEFAREFKGVVRGVV  
DEIGKPNFADYFPLLNRNMDPQGIRRRMSIHFGKMLGLFNDMINQRLQGKRPSEGNDVLDALMAINQEK  
EEIEQSNIPHLLVDLFAAGTDTTSSTLEWAMTEILRNPEILKKAQAELEEIIIGKGNPVEEPDISWLPYLQAI  
KETFRLHPAVPLVVRKVDSDVKLFNYTVPKNAQVLVNLWAIGRDPEIWEEPNTFEPERFLGSEVDVKGRD  
FKLIPFGAGRRICPGLPLATRMihLMLASLIHGFDWKLEAGVSPENTDMEERFGLTLEKAQRLRAIPVRV

>HU07G00504.1-R

ATGGGCATCTCCTCCCAAGAAATGGCAAAAAAACCAAAACTCATCTTACATCAATGGATTACTACAC  
TGTATCGTTGGTAGTCCTCCCATATTATCTATGTCCTCCATAACTTCCTCAAAAAGTCACCTAAAACC

AAGCTTCCTCCAGGACCAACACCATGGCCAATCATAGGCAACATCCACCTCCTTGGCGCCAAGCCTCA  
CCGCTCTGTGCGCAGGACTCTCCAAGATTTATGGACCCTTAATGAGCCTCAGGCTCGGGAGCATCACCA  
CAATAGTGATATCATCCCCGAAGTAGCCAAAGAAATGTTCTAAAACATGACTTAGCCTTTTCTTCTA  
GACAAATCCCAGATGCTTCCCGGATAGCAGGCCATGACAAGCTCTCCATTGCGTGGCTTCCCGTATGC  
CCCAAATGGCGGGATCTCAGGAAAGTCTTGGCCATCCAGTTGTTTACCAACCAACAGCTCCATGCGA  
GTCAGGGCCTCAGGAAGAAGAAAGTGGATGACCTTGTTTCAAGTTTGTAAAGGGGCGCTCTGAAAAGG  
GTCTAGCCATTGATATTGGCAAGGCCGTG**GCAACCACCTCACTCAACTTATTATCAAATACATTTTTTC**  
**AATGGACTTTTCTAGCTATGATTCTTCAGTTTCAGAGGAGTTTAAGGATCTTGCTTGGCATCTGTTGGA**  
**AGA**GGCCGCGAGGCCAAATGTGTGCGATTTTTTCCCATTGCTTAGGCCTTTGGATTTGCAAGGGGTGA  
GAAGAAGGCAGACTATGTACTTCCACAAAATGATGGGATTTTTTGTAGAGAATTGTTGATGAAAGATTG  
AGGGATCAAACAGGTGCAAATGAAGATTTTTTAGGCACTCTACTCAAGCTTGTCAGGAAGATGAGC  
TCACCTTGACGATATCAAACATCTGCTGATTGACTTGTTTATAGCGGAATAGATACTTCCAATG  
TATTGCAATGGGCAATGACTGAATTACTACGCCATCCAGAAAAATGACAAAAGCACAAGCTGAAATC  
GATCAAGTCCTAGGCGAAGGTCAATCAAGGTCAATTGAAGAATCTGACATCTCAAATTTGCCTTACAT  
ACAAGCAATACTGAAGGAAACATTGAGGTTGCACCCACCAGCCCCTTTTTTGGTACCCCATAAAGGCTA  
ACTGTGAGGTACAATTATGTGGCTACTATGTGCCAAAAAATGCACAAGTGTGGGTGAATCTATGGTGC  
CTCAGCCATGATCCAAATGTTTGGGTAAACCCCGAATCATTTATGCCAGAAAGGTTCTTGGAGAGTGA  
AATTGATTTCAAAGGCCGAAATTTGAGCTCATACCCTTCGGAACAGGAAGAAGGATGTGTCTGGA  
ATGCCGCTAGCTCATAGGATGGCACATCTAATGTTGGCAACTCTTCTTCATTCATTCAATTGGAAGCTT  
GATGGTCAGTTAAATTCAGAAGACATAGATATCGAAGAAATGTTTGGGATTACGTTGGCAAAAGCTCA  
GCCACTCGAAGCTATCCCGCTCTCAAGATGGCTTTGA

MGISSQEMAKKPKTHLTSMDYYTVSLVVLPIIIYVLHNFLKKSPKTKLPPGPTPWPIIGNIHLGAKPHRSV  
AGLSKIYGPLMSLRLGSITTIVISSPEVAKEMFLKHDLAFSSRQIPDASRIAGHDKLSIAWLPVCPKWRDLR  
KVLAIQLFTNQQLHASQGLRKKKVDLDLVQFVKGRSEKGLAIDIGKAVATTSNLNLSNTFFSMDFSYDSSV  
SEEFKDLAWHLLEEAARPNVSDFFPLLRLDLQGVRRRQTMYPFHKMMGFFERIVDERLRDQTGANEDFL  
GTLLKLVKEDELTLDDIKHLLIDLFIAGIDTTSNVLQWAMTELLRHPEKMTKAQAEIDQVLGEGQSRISIEE  
SDISNLPYIQAILKETLRLHPPAPFLVPHKANCEVQLCGYYVPKNAQVWVNLWCLSHDPNVWVNPESFM  
PERFLESEIDFKGRNFELIPFGTGRRMCPPGMPLAHRMAHMLATLLHSFNWKLDGQLNSEDIDIEEMFGIT  
LAKAQPLEAIPLSRWL

>HU07G00504.1-W

ATGGGCATCTCCTCCCAAGAAATGGCAAAAAAACCAAAAACTCATCTTACATCAATGGATTACTACAC  
TGTATCGTTGGTAGTCCTCCCCATTATTATCTATGTCCTCCATAACTTCCTCAAAAAGTCACCTAAAACC  
AAGCTTCCTCCAGGACCAACACCATGGCCAATCATAGGCAACATCCACCTCCTTGGCGCCAAGCCTCA  
CCGCTCTGTGCGCAGGACTCTCCAAGATTTATGGACCCTTAATGAGCCTCAGGCTCGGGAGCATCACCA  
CAATAGTGATATCATCCCCGATGTAGCCAAAGAAATGTTCTAAAACATGACTTAGCCTTTTCTTCTA  
GACAAATCCCAGATGCTTCCCGGATAGCAGGCCATGACAAGCTCTCCATTGCGTGGCTTCCCGTATGC  
CCCAAATGGCGGGATCTCAGGAAAGTCTTGGCCATCCGGTTGTTTACCAACCAACAGCTCCATGCGA

GTCAGGGCCTCAGGAAGAAGAAAGTGGATGACCTTGTTTCAGTTTGTAAGGGGCGCTCTGAAAAGG  
GTCTAGCCATTGATATTGGCAAGGCCGTG**GCAACCACCTCACTCAACTTATTATCAAATACATTTTTTC**  
**AATGGACTTTTCTAGCTATGATTCTTCAGTTTCAGAGGAGTTTAAGGATCTTGCTTGGCATCTGTTGGA**  
**AG**AGGCCGCGAGGCCAAATGTGTCGGATTTTTTCCCATTGCTTAGGCCTTTGGATTTGCAAGGGGTGA  
GAAGAAGGCAGACTATGTACTTCCACAAAATGATGGGATTTTTTGAGAGAATTGTTGATGAAAGATTG  
AGGGATCAAACAGGTGCAAATGAAGATTTTTTAGGCACTCTACTCAAGCTTGTCAGGAAGATGAGC  
TCACCCTTGACGATATCAAACATCTGCTGATTGACTTGTTTATAGCGGGAATAGATACAACCTCCAATG  
TATTGCAATGGGCAATGACTGAATTACTACGCCATCCAGAAAAAATGACAAAAGCACAAGCTGAAATC  
GATCAAGTCCTAGGCGAAGGTCAATCAAGGTCAATTGAAGAATCTGACATCTCAAATTTGCCTTACAT  
ACAAGCAATACTGAAGGAAACATTGAGGTTGCACCCACCAGCCCCTTTTTTGGTACCCCATAGGCTG  
ACTGTGAGGTACAATTATGTGGCTACTATGTGCCAAAAAATGCACAAGTGTGGGTGAATCTATGGTGC  
CTCAGCCATGATCCAAATGTTTGGGTAAACCCCGAATCATTTATGCCAGAAAGGTTCTTGGAGAGTGA  
AATTGATTTCAAAGGCCGAAATTTGAGCTCATACCCTTCGGAACAGGAAGAAGGATGTGTCCTGGA  
ATGCCGCTAGCTCATAGGATGGCACATCTAATGTTGGCAACTCTTCTTCATTCATTCAATTGGAAGCTT  
GATGGTCAGTTAAATTCAGAAGACATAGATATCGAAGAAATGTTTGGGATTACGTTGGCAAAAGCTCA  
GCCACTCGAAGCTATCCCGCTCTCAAGATGGCTTTGA

MGISSQEMAKKPKTHLTSMDDYYTVSLVVLPIIYVLHNFLKKSPKTKLPPGPTWPPIIGNIHLGAKPHRSV  
AGLSKIYGPLMSLRLGSITTIVISSPDVAKEMFLKHDLAFFSSRQIPDASRIAGHDKLSIAWLPCPKWRDLR  
KVLAIRLFTNQQLHASQGLRKKKVDDLVQFVKGRSEKGLAIDIGKAVATTSLNLLSNTFFSMDFFSSYDSSV  
SEEFKDLAWHLLLEEAARNVSDFFPLLRLDLQGVRRRQTMFYHKMMGFFERIVDERLRDQTGANEDFL  
GTLLKLVKEDELTLDDIKHLLIDLFIAGIDTTSNVLQWAMTELLRHPEKMTKAQAEIDQVLGEGQSRSEIE  
SDISNLPYIQAILKETLRLHPPAPFLVPHKADCEVQLCGYYVPKNAQVWVNLWCLSHDPNVWVNPESFM  
PERFLESEIDFKGRNFELIPFGTGRRMCPGMPLAHRMAHLMLATLLHSFNWKLDGQLNSEDIDIEEMFGIT  
LAKAQPLEAIPLSRWL

>HU07G00784.1-R

ATGGTGCTGGTGCTCCTCCTGGTTGTAGTTTGCTCTTTCATCTTCTTCCTTGTAATTCTCCCACATCGCG  
AAAAACATGGAATAATCAATCTCCCTCCTGGACCCATAGGCCTCCCCCTCATCGGAAACCTCCACCAG  
TTCGATTCCTCGGCCCTCACCTCTACTTCTCCAAGCTTGCCAAGATCTACGGCCCGATCTTGTCCTTG  
CGATTGCGGTGTAGATCAGCGGTGGTGATTCAATCAGCTGCTCTGGCGAAGGAGGTCCTGAAAACAC  
AGGATCACAACCTTCTGTACGAGGCCAACTCTGGTGGCTCAGCAGAGACTGTCTTACAATGGTTCGGA  
CCTTGTTTTGCGCCCTACAATGACTGTTTCAGAGAGCTTAGGAAATTAAGTGTTGTTTCATTTGTTTAGC  
TCCAAGAAGGTTCAGTCTTCCGCTCCCATTCGACAAGAAGAAGTTTCTAGAATGATCCAGAAGATCAC  
TTCTCTGTATTCTGCTTCGAAAGTCGTAACTTGAGCAACTTGCTTATGGCTCTTACCAGCTCCATTATT  
TGCAGGGTTGCTTTTGGCAAGAGATATGAGGATGAAGGTGTTGAGAGAAGCAGATTCATGAGCTCC  
TGAATGAAGTTCAAGCTATGGCGGCAGCTCCTTTCTTCACAGATTATTTCCCTTTCATAGGAAGCTGGC  
TTGATAAGCTAACTGGACTGTCATCCAGGCTTGAGAAGGTGTTTGAAGAATATGGATGAATTTTATGATG  
AAATCATTAATGATCACCTTGATCCCAATAGGCCTAAAGATGATAGTCGTGAGGATATCATTGATGTTCT

TCTGCAGCTCCGGAAGGAACGTTGCTTCTCTTTTGAGCTCACCTTGGACCACATCAAAGCGCTATTAC  
TGGATATCATTGTAGCAGGAAGTGTACAAAGTGCAGCAATTGTAGTTTGGGCAATGACGGAGTTAATG  
AAAAACCCAAGTCTGATGAGGAAAGTTCAAGAAGAGCTTAGAACCTTGATTCAAGACAAGACATTTA  
TCGACGAGAGTGATCTCTCAAGGTTAACTTACCTCAAAGCTATAGTGAAGGAAACACTTCGACTGCA  
CAATGCAGGTCCATTATTGGTTGTTCTGGGAAGTCATCCAAAAATGTAGTGTACAAGGGTATGATATTCT  
CCCAAAAAGCTTGGTATTTGTTAGCATATGGGAGATCGGTAGAGACCCCAACTTTTGGACTGATCCTG  
AAATATTCATGCCTGAAAGATTTCTCAGGAGCTCAATTGATTTTCAAGAGGGCAAGATTTTGAATTGATAC  
CTTTCGGAGCAGGTAGAAGAATATGTCCTGGACTGCTTCTCGGTTTAGCTAATGTGGAGCTTGCACTT  
GCCAATTTATTATATACTTTTCGACTGGAAATTGCCAGTTGGAATGACGGAGGAAGATATTGACTTTGAT  
GTATTGCCTGGAATCACAATGCACAAAAAGAATCCACTACGCCTCGTAGCAAAGAAGTTCTCTCATGT  
AAACTAA

MVLVLLLTVVVSFIFFLVILPHREKHGKFNLPPIGLPLLGNLHQFDSSAPHLYFSKLAKIYGPILSLRFGS  
KKVQSSAPIRQEEVSRMIQKITSLSSASKVVNLSNLLMALTSSIIICRVAFGKRYEDEGVERSRLFHELLNEVQ  
AMAATPFFTDYFPFIGSWLDKLTGLSSRLEKVFENMDEFYDEIINDHLDPNRPKDDSDREDIIDVLLQLRKE  
RCFSFELTLDHIKAVLLDIIVAGTDTSATIVVWAMTELMKNPTMMRKVQEELRTLQDKTFIDESDLSRLTY  
LKAIVKETLRLHNAGPLLVVREVIQKCSVQGYDILPKSLVFVSIWEIGRDPNFWTDPEIFMPERFLGSSIDF  
RGQDFELIPFGAGRRICPGLLLGLANVELALANLLYTFDWKLPVGMTEEDIDFDVLPGITMHKKNPLCLV  
AKKFSHVN

>HU07G00784.1-W

ATGGTGCTGGTGCTCCTCCTGGTTGTAGTTTGCTCTTTCATCTTCTTCCTTGTAATTCTCCCACATCGCG  
AAAAACATGGAAAATTCAATCTCCCTCCTGGACCCATAGGCCTCCCCCTCATCGGAAACCTCCACCAG  
TTCGATTCTCGGCCCTCACCTCTACTTCTCCAAGCTTGCCAAGATCTACGGCCCGATCTTGTCTTG  
CGATTCTGGGTGTAGATCAGCGGTGGTGATTCAATCAGCTGCTCTGGCGAAGGAGGTCTGAAAACAC  
AGGATCACAAGTCTGTACGAGGCCAAGTCTGGTGGCTCAGCAGAGACTGTCTTACAATGGTTCGGA  
CCTTGTTTTGCGCCCTACAATGACTGTTTCAAGAGAGCTTAGGAAATTAAGTGTGTTTCAATTGTTTAGC  
TCCAAGAAGGTTCAAGTCTTCCGCTCCCATTCGACAAGAAGAAGTTTCTAGAATGATCCAGAAGATCAC  
TTCTCTGTATTCTGCTTCGAAAGTCGTTAACTTGAGCAACTTGCTTATGGCTCTTACCAGCTCCATTATT  
TGCAGGGTTGCTTTTGGCAAGAGATATGAGGATGAAGGTGTTGAGAGAAGCAGATTTCATGAGCTCC  
TGAATGAAGTTCAAGCTATGGCGGCAGCTCCTTTCTTACAGATTATTTCCCTTTCATAGGAAGCTGGC  
TTGATAAGCTAACTGGACTGTCATCCAGGCTTGAGAAGGTGTTTGAGAATATGGATGAATTTTATGATG  
AAATCATTAATGATCACCTTGATCCCAATAGGCCTAAAGATGATAGTCGTGAGGATATCATTGATGTTCT  
TCTGCAGCTCCGGAAGGAACGTTGCTTCTCTTTTGAGCTCACCTTGGACCACATCAAAGCGCTATTAC  
TGGATATCATTGTAGCAGGAAGTGTACAAAGTGCAGCAATTGTAGTTTGGGCAATGACGGAGTTAATG  
AAAAACCCAAGTCTGATGAGGAAAGTTCAAGAAGAGCTTAGAACCTTGATTCAAGACAAGACATTTA  
TCGACGAGAGTGATCTCTCAAGGTTAACTTACCTCAAAGCTATAGTGAAGGAAACACTTCGACTGCA  
CAATGCAGGTCCATTATTGGTTGTTCTGGGAAGTCATCCAAAAATGTAGTGTACAAGGGTATGATATTCT  
CCCAAAAAGCTTGGTATTTGTTAGCATATGGGAGATCGGTAGAGACCCCAACTTTTGGACTGATCCTG

AAATATTCATGCCTGAAAGATTTCTCAGGAGCTCAATTGATTTTCAGAGGGCAAGATTTTGAATTGATAC  
CTTTCGGAGCAGGTAGAAGAATATGTCCTGGACTGCTTCTCGGTTTAGCTAATGTGGAGCTTGCACTT  
GCCAATTTATTATATACTTTGACTGGAAATTGCCAGTTGGAATGACGGAGGAAGATATTGACTTTGAT  
GTATTGCCTGGAATCACAATGCACAAAAAGAATCCACTACGCCTCGTAGCAAAGAAGTTCTCTCATGT  
AAACTAA

MVLVLLL VVVYSIFFLVILPHREKHGKFNLPPIGLPLLGNLHQFDSSAPHL YFSKLAKIYGPILSLRFGS  
KKVQSSAPIRQEEVSRMIQKITSLSSASKVVNLSNLLMALTSSII CRVAFGKRYEDEGVERS RFHELLNEVQ  
AMAATPFFTDYFPFIGSWLDKLTGLSSRLEKVFENMDEFYDEIINDHLDPNRPKDDSR EDIIDVLLQLRKE  
RCFSFELTLDHIKAVLLDIIVAGTDTSATIVVWAMTELMKNPTMMRKVQEELRTL IQDKTFIDESDLSRLTY  
LKAIVKETLRLHNAGPLL VVREVIQKCSVQGYDILPKSLVFVSIWEIGRDPNFWTDPEIFMPERFLGSSIDF  
RGQDFELIPFGAGRRICPGLLLGLANVELALANLLYTFDWKLPVGMTEEDIDFDVLPGITMHKKNPLCLV  
AKKFSHVN

>HU09G01023.1-R

ATGGAATATTACTCCATATCAATTTTGCTCATCCCCGTAATCCTCATTTTCACCCCTTCATCACTTGCTCAA  
AAACTCCCCTAAAACCAAGCTTCCTCCAGGCCCAAAACCATGGCCAATCATAGGCAACATCCACCTC  
ATCGGCTCCAAGCCACACCGCTCTGTGGCAGACCTCTCCAAGACTTATGGACCCTTGATGACCCTCAG  
GCTTGGGAGCATCACCACGATAGTCATATCATCTCCAGATGTAGCCAAGGAAATGTTCTTAAACACG  
ACGTAGACTTTGCCTCTAGGCAAGTCCCGGACTCTGCCTGGGCCGTAGACCATGCAAAGTTCTCAATG  
GTGTGGCTCCCTGTATGCCCCAAATGGCGGGAGATCAGGAAGATCTCAGCCATCCAGCTGTTACCAA  
CCAACGGTTGGATGCAAGCCAGGGCCTTAGGAAGGAGAAAGTCAATGAGCTGGTAAAGTTTGTA  
AGGTTGTTGTGAAAAGGGTCTGGCCGTTGACATTGGCAAGGCCGCGTTCACAACCGCGCTTAACTTG  
TTATCAAACACATTTTTTTTCAATGAATTTGTCTGCATATGATTCTTCAGGCTCGCAGGAGTTCAAGGATC  
TTGCTTGGCATATAATGGAAGAGATTGGACGGCCAAACATATCGGATTTCTTCCCATTGGTTAAGGCCT  
TGGACTTGCAAGGTGTGAAAAGAAGCTTAAGTACTTCTTTTAGCAAAATGCTCGAAGTTTTCGACAA  
GATCATCGATGAAAGATTAAGCGATCAGATTGGTTCAAAGGACGATGTTCTGGACACCCTGCTCAGTC  
TTGTGAAGCAAAATGAGTTGACCCTTGACGATGTCAGACACATGCTCATAGATTTATTTGTTGCGGGG  
ACGGATACAACCTCCAACACAATAGAATGGGCTTTGACAGAACTACTACGCCATCCAGAAAAAATGG  
CAAAGGCACAAGCCGAAATGGAACAACCTTAGGCAAGGGTCAATCAAGATCAATACAAGAATCAG  
ATATCTCAAACTACCTTACATTCAAGCGATAGTGAAAGAGACAATGAGATTGCATCCTACTGTCCCTT  
TTTTGGTACCCCATAGGCTACGACAAATGTAGAATTATGTGGCTATTGGGTGCCCAAAAATGCACAA  
GTATGGGTAAACGTATGGTCTATGGGGCGAGATCCAAGTGTTTGGCCAGATTCTGAATCATTTACACCC  
GAAAGATTTTGGAAAGCGAAATTGATATTAAAGGCCAAGATTTTCGAGCTAATACCCTTTGGAGCAGG  
AAGAAGGATATGTCCCGGAATGCCACTGGCTTATAGAATGCTACATCTAA

MEYYSISILLIPVILIFTLHHLLKNSPKTKLPPGPKPWPIIGNIHLIGSKPHRSVADLSKTYGPLMTLRLGSITT  
IVISSPDVAKEMFLKHDVDFASRQVPDSAWAVDHAKFSMVWLPVCPKWREIRKISAIQLFTNQRLDASQG  
LRKEKVNELVKFVKGCCEKGLAVDIGKAAFTTALNLLSNTFFSMNLSAYDSSGSQEFKDLAWHIMEEIGR

PNISDFFPLVKALDLQGVKRSLSFSKMLEVFDKIIDERLSDQIGSKDDVLDTLSSLVKQNELTLDDVRH  
MLIDLFVAGTDTTSNTIEWALTELLRHPEKMAKAQAEMEQLLGKGQSRSIQESDISKLPIYIQAIVKETMRL  
HPTVPFLVPHKATTNVELCGYWVPKNAQVWVNVWSMGRDPSVWPDESFTPERFLESEIDIKGQDFELIP  
FGAGRRICPGMPLAYRMLHL

>HU09G01023.1-W

ATGGAATATTACTCCATATCAATTTTGCTCATCCCCGTAATCCTCATTTTCACCCTTCATCACTTGCTCAA  
AAACTCCCCCTAAAACCAAGCTTCCTCCAGGCCCAAAACCATGGCCAATCATAGGCAACATCCACCTC  
ATCGGCTCCAAGCCACACCGCTCTGTGGCAGACCTCTCCAAGACTTATGGACCCTTGATGACCCTCAG  
GCTTGGGAGCATCACCACGATAGTCATATCATCTCCAGATGTAGCCAAGGAAATGTTCTTAAACACG  
ACGTAGACTTTGCCTCTAGGCAAGTCCCGGACTCTGCCTGGGCCGTAGACCATGCAAAGTTCTCAATG  
GTGTGGCTCCCTGTATGCCCCAAATGGCGGGAGATCAGGAAGATCTCAGCCATCCAGCTGTTACCAA  
CCAACGGTTGGATGCAAGCCAGGGCCTTAGGAAGGAGAAAGTCAATGAGCTGGTAAAGTTTGTA  
AGGTTGTTGTGAAAAGGGTCTGGCCGTTGACATTGGCAAGGCCGCGTTCACAACCGCGCTTAACTTG  
TTATCAAACACATTTTTTTCAATGAATTTGTCTGCATATGATTCTTCAGGCTCGCAGGAGTTCAAGGATC  
TTGCTTGGCATATAATGGAAGAGATTGGACGGCCAAACATATCGGATTTCTTCCCATTGGTTAAGGCCT  
TGGACTTGCAAGGTGTGAAAAGAAGCTTAAGTACTTCTTTTAGCAAAATGCTCGAAGTTTTTCGACAA  
GATCATCGATGAAAGATTAAGCGATCAGATTGGTTCAAAGGACGATGTTCTGGACACCCTGCTCAGTC  
TTGTGAAGCAAAATGAGTTGACCCTTGACGATGTCAGACACATGCTCATAGATTTATTTGTTGCGGGG  
ACGGATACAACCTCCAACACAATAGAATGGGCTTTGACAGAACTACTACGCCATCCAGAAAAAATGG  
CAAAGGCACAAGCCGAAATGGAACAACCTTAGGCAAGGGTCAATCAAGATCAATACAAGAATCAG  
ATATCTCAAAACTACCTTACATTCAAGCGATAGTGAAAGAGACAATGAGATTGCATCCTACTGTCCCTT  
TTTTGGTACCCCATAGGCTACGACAAATGTAGAATTATGTGGCTATTGGGTGCCCAAAAATGCACAA  
GTATGGGTAAACGTATGGTCTATGGGGCGAGATCCAAGTGTTTGGCCAGATTCTGAATCATTTACACCC  
GAAAGATTTTTTGAAAGCGAAATTGATATTAAGGCCAAGATTTTCGAGCTAATACCTTTGGAGCAGG  
AAGAAGGATATGTCCCGGAATGCCACTGGCTTATAGAATGCTACATCTAA

MEYYSISILLIPVILFTLHHLLKNSPKTKLPPGPKWPPIIGNIHLIGSKPHRSVADLSKTYGPLMTLRLGSITT  
IVISSPDVAKEMFLKHDVDFASRQVPDSAWAVDHAKFSMVWLPVCPKWREIRKISAIQLFTNQRLDASQG  
LRKEKVNELVKFVKGCCEKGLAVDIGKAAFTTALNLLSNTFFSMNLSAYDSSGSQEFKDLAWHIMEEIGR  
PNISDFFPLVKALDLQGVKRSLSFSKMLEVFDKIIDERLSDQIGSKDDVLDTLSSLVKQNELTLDDVRH  
MLIDLFVAGTDTTSNTIEWALTELLRHPEKMAKAQAEMEQLLGKGQSRSIQESDISKLPIYIQAIVKETMRL  
HPTVPFLVPHKATTNVELCGYWVPKNAQVWVNVWSMGRDPSVWPDESFTPERFLESEIDIKGQDFELIP  
FGAGRRICPGMPLAYRMLHL

>HU11G01017.1-R

ATGGTTGGTGGTTATCACATCCCAGCAGGCACTTGGCTCTTCGTTAATCTTTACAAGTTACACAGAGAC  
CCTCAAGTGTGGCCAGAACCCCTGGAATTCCGTCCTGAACGGTTTCTCACAACCTACAAGGATTACG  
ATGTCAGAGGGCAAAATTTTGCACTCATACCTTTTGGAGTTGGTAGAAGAATGTGTCCATTGGAGTATCT

TTTGCCCTTCAGGCCATGCGATTGCTAACCTACTTCATGGTTTTGAGATCTCAACTCCATATG  
GTGAAAAAGTTGACATGACAGAGGGGTTTGACTAACCACCTCAAAGCCTCC

MVGGYHIPAGTWLFVNLYKLHRDPQVWPEPLEFRPERFLTTHKDYDVRGQNFALIPFGVGRRMCPGVSF  
ALQAMRFIIANLLHGFEISTPYGEKVDMTEGFGLTHLKAS

>HU11G01017.1-W

ATGGTTGGTGGTTATCACATCCCAGCAGGCACTTGGCTCTTCGTTAATCTTTACAAGTTACACAGAGAC  
CCTCAAGTGTGGCCAGAACCCCTGGAATTCCGTCCTGAACGGTTTCTCACAACCTACAAGGATTACG  
ATGTCAGAGGGCAAAAGTTTGCATCATACCTTTTGGAGTTGGTAGAAGAATGTGTCC**TGGAGTATCT**  
**TTTGCCCTTCAGGCCATGCGATTGCTAACCTACTTCATGGTTTTGAGATCTCAACTCCATCTG**  
**GTGAAAAAGTTGACATGACAGAGGGGTTTGACTAACCACCTCAAAGCCTCC**

MVGGYHIPAGTWLFVNLYKLHRDPQVWPEPLEFRPERFLTTHKDYDVRGQKFALIPFGVGRRMCPGVSF  
ALQAMRFIVANLLHGFEISTPSGEKVDMTEGFGLTHLKAS

>HU11G01870.1-R

ATGGACACATACACAGTTGTACTTGCACAACTACTACTGGCCTTCACAATCTTCGTCCTCTTCTTCAAA  
CCCAGAACTCCAACCTCCCTCCCGGCCCGAAACCATGGCCGATCATCGGCAACCTGCTCCACCTCG  
GCGACAAGCCCCACCGCCGCCTCACCGAACTTTCCAGAACCTACGGCCCCATAATGTTTCATCAAGCTA  
GGGTTCGTACCCACCATCGTCATCTCCTCCCC**GGAAATCGCCAAACAAGTCTTCCTCAACCATGATCT**  
**AGACTTTTCCGGCAGGAATGTCCCCGCCGGCGGCAAGGTTCCGACCACCAC**AAACTCTCAATCGGG  
TGGTTACCCGTTTGCCCCAAATGGCGGACCCTCCGGAAAATCGCGACGATTCATTTGTTACCCGAAA  
AGCCCTGGACGCCGGGGAGAGTCTCCGGCGAACGGTGGTGGATAAGCTAATTGGGTTTCGTCGGAGAC  
TGTTGTAAACGGGTCGACCCGTTGATATTGGCAAGGCTGTGTTTGTACGTCGATTAACCTATTGTCTG  
AACACTCTTTTTTCGATCGATTTGGCTAGTTATGGTGATTGGAAATCGGATGATTTAAGAAGATTTTGT  
GGGAGTTTGGGAGGAAGCTGGGAAGCCCAATTTGACTGATGCTTTTCCGGTGCTGGGGTGGTTGGA  
TTTGCAGAGAGCATCAAAGAGAGTTGGAAGGTGTTTTGATAGGGTTTTGGGGG.TTTTTGAGGAGATT  
ATCGAGCGAAGAATTAGGGATTCCAAGGGTTTTGGGGATGATGGTTTGGGGAATTTCTGAAGCTTGT  
TGAAGAAAATGAATGGAGCCTTGATGATGTCAAACATTTCTCTTCGATTTGTTTATAGCAGGAACAG  
ACACTACCTCAACTACAGTAGAGTGGGCGATGACAGAATTACTACGACACCCAGAAAAGATGGCGAA  
GGCCCAAAGTGAAATCGTTCAAGTAATTGGCGATAATGGTAGGCCAGTTCAAGAACTTGACATCCCAA  
AACTTCCCTATATACAAGCAATAGCGAAAGAGACATTGAGAATGCACCCGCCAGCCCCTTTCCTCTTA  
CCCCACAAGGCCGAAAAAATGTACAATTAGACGGCTACCTAGTGCCTAAGAATGCGCAAGTATGGG  
TCAATGTATGGGGAATTGGTCACGACCCTAGTGTGTGGCCAAACCCAGATTCATTTACACCCGAAAGA  
TTTTTGAACGGGGGTGTTGATGCCAAAGGTAGAGATTCGAGTTCATACCATTCCGGTGAAGGAAGAA  
GGATATGTCTTGGGATGCCATTGGCATATCGGATGTTGCATCTAGTGTGGCTAATTTGCTTTGTTTCGTT  
CGATTGGAAGCCTAGCGATGGAGTCAGCCCCATGATGTAGGCGTGGATGATAAGTTTGAATTGTGG  
TACAAAGAAACCCTCCATTAGAAGCTATTCCTTGTGCCATATGA

MDTYTVVLAQLLLAFTIFVLFFKPRNSNLPPGPKWPPIIGNLLHLGDKPHRRLTELSRTYGPIMFIKLGFP  
TIVISSPEIAKQVFLNHDLDIFSGRNVPAGGKVSDHHKLSIGWLPVCPKWRTLRLKIATIHFLT GKALDAGES  
LRRTVVDKLIGFVGDCCKTGRPVDIGKAVFVTSINLLSNTLFSIDLASYGDWKSDDFKILWEFWEEAGK  
PNLTDAFPVLGWLDLQRASKRVGRCFDRVLGVFEEIIRIRDSKGFDDGLGNFLKLVEENEWSLDDVK  
HFLFDLFIAGTDTTSTTVEWAMTELLRHPEKMAKAQSEIVQVIGDNRPVQELDIPKLPYIQAIAKETLRM  
HPPAPFLLPHKAENQVLDGYLVPKNAQVWVNVWGIGHDPSVWPNPDSFTPERFLNGGVDAKGRDFEFI  
PFGEGRRICLGMPLAYRMLHLVLANLLCSFDWKPSDGVSPHDVGVDDKFGIVVQRNPPEAIPCAI

>HU11G01870.1-W

ATGGACACATACACAGTTGTACTTGCACAACACTACTGCGCTTCACAATCTTCGTCCTCTTCTTCAAA  
CCCAGAAACTCCAACCTCCCTCCCGGCCCGAAACCATGGCCGATCATCGGCAACCTGCTCCACCTCG  
GCGACAAGCCCCACCGCCGCCTCACCGAACCTTTCCAGAACCTACGGCCCCATAATGTTTCATCAAGCTA  
GGGTTCGTACCCACCATCGTCATCTCCTCCCCGGAATCGCCAAACAAGTCTTCTCAACCATGATCT  
AGACTTTTCCGGCAGGAATGTCCCCGCGCGGCAAGGTTTCCGACCACCACAAACTCTCAATCGGG  
TGTTTACCCGTTTGCCCCAAATGGCGGACCCTCCGGAAATCGCGACGATTCATTTGTTACCGGAAA  
AGCCCTGGACGCCGGGGAGAGTCTCCGGCGAACGGTGGTGGATAAGCTAATTGGGTTCGTCGGAGAC  
TGTTGTAAAACGGGTCGACCCGTTGATATTGGCAAGGCTGTGTTTGTACGTCGATTAACCTATTGTGCG  
AACACTCTTTTTTCGATCGATTTGGCTAGTTATGGTGATTGGAATCGGATGATTTAAGAAGATTTTGT  
GGGAGTTTGGGAGGAAGCTGGGAAGCCCAATTTGACTGATGCTTTCCGGTGCTGGGGTGTTGGA  
TTTGAGAGAGCATCAAAGAGAGTTGGAAGGTGTTTGTATAGGGTTTGGGGG.TTTTGGAGGAGATT  
ATCGAGCGAAGAATTAGGGATTCCAAGGGTTTGGGGATGATGGTTTGGGGAATTTCTGAAGCTTGT  
TGAAGAAAATGAATGGAGCCTTGATGATGTCAAACATTTCTCTTCGATTTGTTTATAGCAGGAACAG  
ACACTACCTCAACTACAGTAGAGTGGGCGATGACAGAATTACTACGACACCCAGAAAAGATGGCGAA  
GGCCCAAAGTGAAATCGTTCAAGTAATTGGCGATAATGGTAGGCCAGTTCAAGAACTTGACATCCCAA  
AACTTCCCTATATACAAGCAATAGCGAAAGAGACATTGAGAATGCACCCGCCAGCCCCTTTCCTCTTA  
CCCCACAAGGCCGAAAAAATGTACAATTAGACGGCTACCTAGTGCCTAAGAATGCGCAAGTATGGG  
TCAATGTATGGGGAATTGGTCACGACCCTAGTGTGTGGCCAAACCCAGATTCATTTACACCCGAAAGA  
TTTTTGAACGGGGGTGTTGATGCCAAAGGTAGAGATTCGAGTTCATACCATTCCGGTGAAGGAAGAA  
GGATATGTCTTGGGATGCCATTGGCATATCGGATGTTGCATCTAGTGTGGCTAATTTGCTTTGTTTCGTT  
CGATTGGAAGCCTAGCGATGGAGTCAGCCCCCATGATGTAGGCGTGGATGATAAGTTTGAATTGTGG  
TACAAAGAAACCTCCATTAGAAGCTATTCCTTGTGCCATATGA

MDTYTVVLAQLLLAFTIFVLFFKPRNSNLPPGPKWPPIIGNLLHLGDKPHRRLTELSRTYGPIMFIKLGFP  
TIVISSPEIAKQVFLNHDLDIFSGRNVPAGGKVSDHHKLSIGWLPVCPKWRTLRLKIATIHFLT GKALDAGES  
LRRTVVDKLIGFVGDCCKTGRPVDIGKAVFVTSINLLSNTLFSIDLASYGDWKSDDFKILWEFWEEAGK  
PNLTDAFPVLGWLDLQRASKRVGRCFDRVLGVFEEIIRIRDSKGFDDGLGNFLKLVEENEWSLDDVK  
HFLFDLFIAGTDTTSTTVEWAMTELLRHPEKMAKAQSEIVQVIGDNRPVQELDIPKLPYIQAIAKETLRM  
HPPAPFLLPHKAENQVLDGYLVPKNAQVWVNVWGIGHDPSVWPNPDSFTPERFLNGGVDAKGRDFEFI  
PFGEGRRICLGMPLAYRMLHLVLANLLCSFDWKPSDGVSPHDVGVDDKFGIVVQRNPPEAIPCAI



## DODa

> HU03G01342.1-R

ATGGGTGTTGGCAAAGAAGTGTCTGTTCAAGGAGACTTTCTATGTGTCTCATGGGAATCCGGCCATGTTGGC  
CGATGTGTCGTTTCATAGCACGGAACCTCCTGCTGGGGTGGAAGACGAATGTCTTCCCCATCAAACCCAAGT  
CGATCCTGGTTGTCTCTGCTCACTGGGAGACTGATGTGCCTTCTGTATCTGCCGGTGAACATCCTGATGTCA  
TTTACGATTTACGCGATGTTTCCTGACTGTATGTTCCAGATGAAGTACCCAGCTCTAGGGTCACCAAACTG  
GCCAAAAGGGTGCAGGAGCTACTGATAGCAGGAGGGTTCAAGACAGCGAGCCTAGACGAGAGTCGTGGG  
TTCGACCACAGCTCATGGGTGCCCCTGAGCCTCATGTACCCTGAGGCTGACATCCCGGTGTGCCAGCTCTC  
AGTCCAGCCTCACCTAAGCGCGAGCCACCACTTCGACATAGGGAGGGCTTTGGCTCCTCTCAAGGAGGAA  
GGGGTCCTGTTTCATTGGGTCTGGGGGTGCAGTGCACCCTTCTGATGACACCCACACTGGTCTGATGGGGT  
TGCCCCCTGGGCTGCTGAGTTTGATCAATGGCTTGAGGATGCTCTCATTAATGGAAGGTACGATGATGTGAA  
TAATTATCAAACAAAAGCACCTTCTGGGTGGAAAATAGCACATCCAATTCCAGAACACTTTTTACCGTTGC  
ATGTAGCCATGGGTGCAGCTGGTGAAAAATCAAAGGCAGAGCTCATTTATCGTACGTGGGATCATGGTACT  
CTTGGCTATGCCTCCTACAAGTTCACTTCCATCTGA

MGVGKEVSFKETFYVSHGNPAMLADVSIARNFLLGWKTNVFPIKPKSILVVSABWETDVPSVSAGEHPD  
VIYDFSDVPDCMFQMKYPALGSPKLAKRVQELLIAGGFKTASLDES RGFHDSSWVPLSLMYPEADIPVCQ  
LSVQPHLSASHHFDIGRALAPLKEEGVLFIGSGGAVHPSDDTPHWS DG VAPWAAEFDQWLEDALINGRYD  
DVNNYQTKAPSGWKIAHPIPEHFLPLHVAMGAAGEKSKAELIYRTWDHGT LGYASYKFTSI

> HU03G01342.1-W

ATGGGTGTTGGCAAAGAAGTGTCTGTTCAAGGAGACTTTCTATGTGTCTCATGGGAATCCGGCCATGTTGGC  
CGATGTGTCGTTTCATAGCGCGGAACCTCCTGCTGGGGTGGAAGAAGAATGTCTTCCCCATCAAACCCAAGT  
CGATCCTGGTTGTCTCTGCTCACTGGGAGACTGATGTGCCTTCTGTATCTGCCGGTGAACATCCTGATGTCA  
TTTACGATTTACGCGATGTTTCCTGACTGCATGTTCCAGATGAAGTACCCAGCTCCAGGGTACCAAACTG  
GCCAAAAGAGTGCAGGAGCTACTGATAGCAGGAGGGTTCAAGACAGCGAGCCTAGACGAGAGTCGTGGG  
TTCGACCACAGCTCATGGGTGCCCCTGAGCCTCATGTACCCTGAGGCTGACATCCCGGTGTGCCAGCTCTC  
AGTCCAGCCTCACCTAAGCGCGAGCCACCACTTCGACGTAGGGAGGGCTTTGGCTCCTCTCAAGGAGGAA  
GGGGTCCTGTTTCATTGGGTCTGGGGGTGCAGTGCACCCTTCTGATGACACCCACACTGGTTTGATGGGGT  
CGCCCCCTGGGCTGCTGAGTTTGATCAATGGCTTGAGGATGCTCTCATTAATGGAAGGTACGATGATGTGA  
ATAATTATCAAACAAAAGCACCTTCTGGGTGGAAAATAGCACATCCAATTCCAGAACACTTTTTACCGTTG  
CATGTAGCCATGGGTGCAGCTGGTGAAAAATCAAAGGCAGAGCTCATTTATCGTACGTGGGATCATGGTAC  
TCTTGGCTATGCCTCCTACAAGTTCACTTCCATCTGA

MGVGKEVSFKETFYVSHGNPAMLADVSIARNFLLGWKKNVFPIKPKSILVVSABWETDVPSVSAGEHP  
DVIYDFSDVPDCMFQMKYPAPGSPKLAKRVQELLIAGGFKTASLDES RGFHDSSWVPLSLMYPEADIPVC  
QLSVQPHLSASHHFDVGRALAPLKEEGVLFIGSGGAVHPSDDTPHWF DG VAPWAAEFDQWLEDALINGR

YDDVNNYQTKAPSGWKIAHPIPEHFLPLHVAMGAAGEKSKAELIYRTWDHGTLGYASYKFTSI

>HU08G01572.1-R

ATGCTTCAGCAACTAATTAGTGGATGGCAGAGATTGGGCATTGGCTGTCCTTATCTTGATTATAAGTATCTCG  
TGACAGGCAGAGAAGTGGGTACACTTCTAATAGCTTCTAAGATCAAAACAAGAGAAAACTAAATTTTCAT  
TTGCACCAGCAAAATGGGTGAGCAGGAAGCAATTAGGGAGACATTCTACATATCTCATGGGACACCAAAG  
ATGTCGATCGATGATTCTATAGCAGCAAAGAAGTTCTTTCAGGAATGGGAGAAAGTCTACTCCAAGAGGCC  
AAAGTCTATGCTTGTGATCTCTGCTCACTGGGA**GACTGATGTGCCTGCTGTTAATGCTGTTACTCACTCTGA**  
**TCTCATCTATGATTTTCAGGGGCTTTCCTGCCATCATGTACCAGCTCAAGTACCCAGCTCCTGGTGCACCAGA**  
**TTTGGCAAGGAGGGTAGAGGAACT**TCTGACAGCATCAGGGTTCAGCTGTGTTGTAGACAAGAAGCGCGGT  
CTTGATCATGGCTCATGGGTGCCTCTCATGCTCATGTACCCGGAGGCTGATATCCCGGTTTGCCAGCTCTCA  
GTGCAATCACACCTAGATGGAACGCACCACTATAACTTGGGAAAGGCTTTGGCTCCTCTTAAGGAGGAAG  
GTGTCCTTATCATTGGTTCTGGGAGTGCTGTTACCCCTCAAATAGTACTCCTATTTCTCTTGATGGAGTTGC  
TCCTTGGGCTGCAGCGTTCGATTCCTGGCTAGAAGAAGCTCTCAAAAGTGGAAGGTATGAAGATGTGAAC  
AATTATCAAGCAAAGGCACCAAACCTGGGAACTGGCaCACCCATGGCCAGAGCACTTTTACCCATTACATGT  
AGCCATGGGTGCAGCTGGTGAAAACCTCGAAGGCCGAGCTTATTCATCGCAGtGGGACCATGGCACCCCTTG  
GCTATGCCTCCTACATATTCACCTTCCTGCTGA

MLQQLISGWQRLGIGCPYLDYKYLVTGREVGTLLIASKIKTREKLNFICTSKMGEQEAIREFYISHGTPK  
MSIDDSIAAKKFFQEWKVVYSKRPKSMLVISAHWETDVPVNAVTHSDLIYDFRGFPAIMYQLKYPAPGA  
PDLARRVEELLTASGFSCVVDKKRGLDHGSWVPLMLMYPEADIPVCQLSVQSHLDGTHHYNLGKALAPL  
KEEGVLIIGSGSAVHPSNSTPISLDGVAPWAAAFDSWLEELKSGRYEDVNNYQAKAPNWELAHPWPEHF  
YPLHVAMGAAGENSKAELIHRSWDHGTLGYASYIFTSC

> HU08G01572.1-W

ATGCTTCAGCAACTAATTAGTGGATGGCAGAGATTGGGCATTGGCTGTCCTTATCTTGATTATAAATATCTCG  
TGACAGGCAGAGAAGTGGGTACACTTGTAAATAGCTTCTAAGATCAAAACAAGAGAAAACTAAATTTTCAT  
TTGCACCAGCAAAATGGGTGAGCAGGAAGCAATTAGGGAGACATTCTACATATCTCATGGGACACCAAAG  
ATGTCGATCGATGATTCTATAGCAGCAAAGAAGTTCTTTCAGGAATGGGAGAAAGTCTACTCCAAGAGGCC  
AAAGTCTATGCTTGTGATCTCTGCTCACTGGGA**GACTGATGTGCCTGCTGTTAATGCTGTTACTCACTCTGA**  
**TCTCATCTATGATTTTCAGGGGCTTTCCTGCCATCATGTACCAGCTCAAGTACCCAGCTCCTGGTGCACCGGA**  
**TTTGGCAAGGAGGGTAGAGGAACT**TCTGACAGCATCAGGGTTCAGCTGTGTTGTAGACAAGAAGCGCGGT  
CTTGATCATGGCTCATGGGTGCCTCTCATGCTCATGTACCCGGAGGCTGATATCCCGGTTTGCCAGCTCTCA  
GTGCAATCACACCTAGATGGAACGCACCACTATAACTTGGGAAAGGCTTTGGCTCCTCTTAAGGAGGAAG  
GTGTCCTTATCATTGGTTCTGGGAGTGCTGTTACCCCTCAAATAGTACTCCTATTTCTCTTGATGGAGTTGC  
TCCTTGGGCTGCAGCGTTCGATTCCTGGCTAGAAGAAGCTCTCAAAAGTGGAAGGTATGAAGATGTGAAC  
AATTATCAAGCAAAGGCACCAAACCTGGGAACTGGCACACCCATGGCCAGAGCACTTTTACCCATTACATGT  
AGCCATGGGTGCAGCTGGTGAAAACCTCGAAGGCCGAGCTCATTATCGCAGTTGGGACCATGGCACCCCTT  
GGCTATGCCTCCTACATATTCACCTTCCTGCTGA

MLQQLISGWQRLGIGCPYLDYKYLVTGREVGTLVIASKIKTREKLNFICTSKMGEQEAIREFYISHGTPK  
MSIDDSIAAKKFFQEWEKVYSKRPKSMLVISAHWETDVPVNAVTHSDLIYDFRGFPAIMYQLKYPAPGA  
PDLARRVEELLTASGFSCVVDKKRGLDHGSWVPLMLMYPEADIPVCQLSVQSHLDGTHHYNLKGALAPL  
KEEGVLIIGSGSAVHPSNSTPISLDGVAPWAAAFDSWLEEALKSGRYEDVNNYQAKAPNWELAHPWPEHF  
YPLHVAMGAAGENSKAELIHRSWDHGTLGYASYIFTSC

## DODaβ

> HU08G01571.1-R

ATGTCATCAGCATCGCATAACTTGCCTTATGATTTTAAATACGCATACCCAATGATGTCGAGAAAAAAA  
CCCAAGTTGCGAAATTCAAAATTATTCTCAAAACCCATTTCCCCTCTGTCTCTGGGCATCATCTTCATC  
CTCTCCTTCTTCGGTCTGGCTTTTCGCCTTCAAATTCAATTGTTGTTTTAGCAACGGTTTTCTGCAGTCA  
AAGAAGGCGAACAACAGTTTTCCGCAATCAAATAAGGCCCTGTTGTCGGTTTTTCGGAAAACCCAGA  
TCAAATCTAGGGCAACAAATTCAACGAGTATCGCAACAAATACGATGGCTGGTGCAACGAAGGTGAA  
GGAGACGCTGTACATCTCTCATGGGTCGCCGATGCTTTCTGTTGATGATTCGTTGCCCGCGAGGCATTT  
TTTGAAGAGTTGGAAGGAGAAGATCTACTCAATGAAACCCAATTCGATTCTTGTATTCTGGGCATTG  
GGAAACCGATGAACCCTCGATTACTGCCTCTGATCGTTGCGATACTATCCATGATTCTATGGGTTTCCT  
GATCGATTGTATAAGCTCAAGTACCCAGCTCCAGGGGCTCCAGATTGCGCAAAGCGAGCACAGAAC  
TTCTCCTGAACTCAGGATTCAAGCATGTCAACTTGGACAAAAAGCGTGGGCTTGATCATGGTGATGG  
GTGCCTCTCATGCTTATGTATCCCGAGGCCGATATCCCTGTCTGTCAGCTCTCCGTTCAACTGCACAAG  
GATGCCAAATATCACTATAACATCGGACAAGCATTGGCCCCCTTAAGGAGGATGGTGTCTCATCATG  
GGTTCTGGAAGCGCAACCCACAATTTGAGGGACCTTGACTTTGATGCTGAAGGGGCTACCCCGTGGG  
CTGCAGAGTTTGATAAATGGCTAGAAGAATCTCTGACAAATGGAAGGTATGAAGATGTGAATAACTAT  
GAGAAGAAAGCTCCACATGCGAAAAGAGCTACCCATGGCCAGATCACTTCTACCCATTGCATGTAG  
CCATGGGTGCGGCTGGGGAGACCTCAAAGGCGGAGCTCATTATCGCAGCTGGGGCCTTGGTACTAT  
ATCTTATGCATCCTATAAATCACCTCCACTGATTAA

MSSASHNLPYDFKYAYPMMSRKKPKLRNSKLFSKPISPLSLGIIFILSFFGLAFKFNCCFSNGFLQSKKA  
NNSFPQSNKAPVVGFRKTQIKSRATNSTSIATNTMAGATKVKETLYISHGSPMLSVDDSLPARHFLKSWKE  
KIYSMPNSILVISGHWETDEPSITASDRCDTIHDFYGFDPRLYKLKYPAPGAPDLAKRAQELLLNSGFKH  
VNLDKKRGLDHGAWVPLMLMYPEADIPVCQLSVQLHKDAKYHYNIGQALAPLKEDGVLIMGSGSATHN  
LRDLDFDAEGATPWAAEFDKWLEESLTNGRYEDVNNYEKKAPHAHRAHPWPDHFYPLHVAMGAAGET  
SKAELIHRSWGLGTISYASYKFTSTD

>HU08G01571.1-W

ATGTCATCAGCATCGCATAACTTGCCTTATGATTTTAAATACACATACCCAATGATGTCGAGAAAAAAA  
CCCAAGTTGCGAAATTCAAAATTATTCTCAAAACCCATTTCCCCTCTGTCTCTGGGCATCATCTTCATC  
CTCTCCTTCTTCGGTCTGGCTTTTCGCCTTCAAATTCAACTGTTGTTTTAGAAACGGTTTTCTGCAGTCA

AAGAAGGCGAACAACAGTTTTCCGCAATCAAATAAGGCCCTGTTGTCGGTTTTTCGGAAAACCCAGA  
TCAAATCTAGGGCAACAAATTCAACGAGTATCGCAACAAATACGATGGCTGGTGCAACGAAGGTGAA  
GGAGACGCTGTACATCTCTCATGGGTCGCCGATGCTTTCTGTTGATGATTCGTTGCCCGCGAGGCATTT  
TTTGAAGAGTTGGAAGGAGAAGATCTACTCAATGAAACCAATTCGATTCTTGTTATTTCTGGGCATTG  
GGAAACCGATGAACCCTCGATTACTGCCTCTGATCGTTGCGATACTATCCATGATTTCTATGGGTTTCCT  
GATCGATTGTATAAGCTCAAGTACCCAGCTCCAGGGGCTCCGGATTGCGCAAAGCGAGCACAAAGAAC  
TTCTCCTGAACCTCAGGATTCAAGCATGTCAACTTGGACAAAAAGCGTGGGCTTGATCATGGTGCATGG  
GTGCCTCTCATGCTTATGTATCCCGAGGCCGATATCCCTGTCTGTCAGCTCTCCGTTCAACTGCACAAG  
GATGCCAAATATCACTATAACATCGGACAAGCATTGGCCCCCTTAAGGAGGATGGTGTCTCATCATG  
GGTTCTGGAAGCGCAACCCACAATTTGAGGGACCTTGACTTTGATGCTGAAGGGGTACCCCGTGGG  
CTGCAGAGTTTGATAAATGGCTAGAAGAATCTCTGACAAATGGAAGGTATGAAGATGTGAATAACTAT  
GAGAAGAAAGCTCCACATGCGAAAAGAGCTCACCCATGGCCAGATCACTTCTACCCATTGCATGTAG  
CCATGGGTGCAGCTGGGGAGACCTCAAAGGCGGAGCTCATTCATCGCAGCTGGGGCCTTGGTACTAT  
ATCTTATGCATCCTATAAATTCACCTCCACTGATTAA

MSSASHNLPYDFKYTYPMMSRKKPKLRNSKLFSKPISPLSLGIIFILSFFGLAFKFNCCFRNGFLQSKKA  
NNSFPQSNKAPVVGFRKTQIKSRATNSTSIATNTMAGATKVKETLYISHGSPMLSVDDSLPARHFLKSWKE  
KIYSMPNSILVISGHWETDEPSITASDRCDTIHDFYGFPDRLYKLKYPAPGAPDLAKRAQELLLNSGFKH  
VNLDKKRGLDHGAWVPLMLMYPEADIPVCQLSVQLHKDAKYHYNIGQALAPLKEDGVLIMGSGSATHN  
LRDLDFDAEGVTPWAAEFDKWLEESLTNGRYEDVNNEYEKAPHAKRAHPWPDHFYPLHVAMGAAGET  
SKAELIHRSWGLGTISYASYKFTSTD

## B5GT

> HU01G00156.1-R

ATGAACATGGCTGCTGAAGATCAACAGCTTCATGTAGTGTCTTCCCCTTCTTGGCCCATGGCCATATG  
ATTCCGACCCTCGATGTTGTAAGGCTCTTTGCATGTCATGGGGTCAGGGTCACCATCATCACCAACCCT  
CTGAACGCCCACATCTTCAATAAGGCTGTTGAGACGGCTACGAAAATGGGTGCCCCGGGTCGTTGATGT  
TGAGCTATTCAGGTTCCCTGCCGAAGAAGCAGGCCTGCCAGAAGGATTTGAGAACTTAGAGCTAGTT  
AAGGAGGATGACATGATTGTTAAGTTCATCGCTGCCAGTGAGCTGCTCAGAGAGCAGCTTGAGCCATA  
CTTGGAGAAGACACGACCGAACTGCCTCGTTGCTGACATGTTTTTCCATGGGCAACGGAGTGTGCA  
GCCAAGTTCGACATCCCTAGGCTAGTCTTCCATGGCACTAACTTCTTTTACTTGTTGCTTCGGAGATT  
ATCAGGCTATATGAGCCTTATAAGAATGTCTCTTCGGATGAGGAGCCATTCGCTCTTCCGTCCCTTCCA  
CATGAGATACAGATGACAAGACTGCAGCTACCAGAGGATCTATGGAAGTACGAGGAATCCGATTTCAA  
AAGGAGGATAGCACTAATCCACGAATCGGAGGTTGCAAGCTATGGGGTGATCGTCAACAGCTTTTATG  
AGTTGGAACCGGATTATGCAGATTTCTTCGGGAAGGAATTAGGAAGGAGGGCATGGCATATAGGCCCA  
GCTTTACTCTGCAATAGGAGTACCAAGAACAAAGCTCAGAGGTTGAAACAACCCGATCTAGATGAAC  
ACGAGTGCCTGAAGTGGCTTAACTCAAGGAAGCCCAACTCAGTCATTTACATCTGTTTCGGAAGCACT

GCACATGTGATTGGCCCTCAGCTACATGAGATAGCAGTGGCTTTGGAAGCGTCAGAACAAAGCGTTCAT  
TTGGGTAGTGAAGAATGAGGATTACGAAAAGAGTGCAGAGTGGTTGCCACAGTGTTTGAGGAGCG  
GTTGGAACAACGAGGTCTAATTATAAAAGGGTGGGCTCCTCAGGTGCTTATTTTAGAGCATGAAGCTA  
TAGGAGCATTGTGACCCACTGTGGATGGAACCTCGATCTTAGAAGGGATCTCGGCTGGGGTGCCAGTG  
GTTACATGGCCTGTTTTTGCTGAGCAGTTCTATAACGAAAGGTTTCGTGACTCAGATTTTGAAGATTGG  
GGTGCCCATTTGGATCTAAGAAGTGGGGTATTGTGACTACTACAGAGTACATGGTGAAACGGGACTCTA  
TAGAGAAGGCATTGAGAGAAATCATGGTAGGAGAGGAAGCTGAGGAGAGGAGAAACAGAGCACAG  
AAGTTGAAGGCGATGGCATGGAAGGCTGTCTGAAGAAGGGGGTTCATCTTATTCTGATCTAAGTGCCT  
AATAAATGAGCTTAGGGTTTATCGCACTTAA

MNMAAEDQQLHVVFPPFLAHGHMPTLDVVRLFACHGVRVTIITPLNAHIFNKAVETATKMGARVVDV  
ELFRPAAEEAGLPEGFENLELVKEDDMIVKFIAASELLREQLEPYLEKTRPNCLVADMFFPWATECAAKFDI  
PRLVFHGTNFFYLCASEIIRLYEPYKNVSSDEEPFALPSLPHEIQMTRLQLPEDLWKYEESDFKRRIALIHES  
EVASYGVIVNSFYELEPDYADFFGKELGRRAWHIGPALLCNRSTKNKAQRLKQPDLEHECLKWLNRSRK  
PNSVIYICFGSTAHVIGPQLHEIAVALEASEQAFIWVVKNEYEKSAEWLPTVFEERLEQRGLIKGWAPQV  
LILEHEAIGAFVTHCGWNSILEGISAGVPVVTWPVFAEQFYNERFVTQILKIGVPIGSKKWGIVTTTEYMV  
KRDSIEKALREIMVGEEAEERRNRAQKLKAMAWKAVEEGSSYSDLSALINELRVYRT

>HU01G00156.1-W

ATGAACATGGCTGCTGAAGATCAACAGCTTCATGTAGTGTCTTCCCCTTCTTGCCCATGGCCATATG  
ATTCCGACCCTCGATGTTGTAAGGCTCTTTGCATGTCATGGGGTCAGGGTCACCATCATCACCACCCCT  
CTGAACGCCACATCTTCAATAAGGCTGTTGAGACGGCTACGAAAATGGGTGCCCGGGTCGTTGATGT  
TGAGCTATTCAGGTTCCCTGCCGAAGAAGCAGGCCTGCCAGAAGGATTTGAGAACTTAGAGCTAGTT  
AAGGAGGATGACATGATTGTTAAGTTCATCGCTGCCAGTGAGCTGCTCAGAGAGCAGCTTGAGCCATA  
CTTGGAGAAGACACGACCGAACTGCCTCGTTGCTGACATGTTTTTCCATGGGCAACGGAGTGTGCA  
GCCAAGTTCGACATCCCTAGGCTAGTCTTCCATGGCACTAACTTCTTTTACTTGTGTGCTTCGGAGATT  
ATCAGGCTATATGAGCCTTATAAGAATGTCTCTTCGGATGAGGAGCCATTCGCTCTTCCGTCCCTTCCA  
CATGAGATACAGATGACAAGACTGCAGCTACCAGAGGATCTATGGAAGTACGAGGAATCCGATTTCAA  
AAGGAGGATAGCACTAATCCACGAATCGGAGGTTGCAAGCTATGGGGTGATCGTCAACAGCTTTTATG  
AGTTGGAACCGGATTATGCAGATTCTTCGGGAAGGAATTAGGAAGGAGGGCATGGCATATAGGCCCA  
GCTTTACTCTGCAATAGGAGTACCAAGAACAAAGCTCAGAGGTTGAAACAACCCGATCTAGATGAAC  
ACGAGTGCCTGAAGTGGCTTAACTCAAGGAAGCCCAACTCAGTCATTTACATCTGTTTCGGAAGCACT  
GCACATGTGATTGGCCCTCAGCTACATGAGATAGCAGTGGCTTTGGAAGCGTCAGAACAAAGCGTTCAT  
TTGGGTAGTGAAGAATGAGGATTACGAAAAGAGTGCAGAGTGGTTGCCACAGTGTTTGAGGAGCG  
GTTGGAACAACGAGGTCTAATTATAAAAGGGTGGGCTCCTCAGGTGCTTATTTTAGAGCATGAAGCTA  
TAGGAGCATTGTGACCCACTGTGGATGGAACCTCGATCTTAGAAGGGATCTCGGCTGGGGTGCCAGTG  
GTTACATGGCCTGTTTTTGCTGAGCAGTTCTATAACGAAAGGTTTCGTGACTCAGATTTTGAAGATTGG  
GGTGCCCATTTGGATCTAAGAAGTGGGGTATTGTGACTACTACAGAGTACATGGTGAAACGGGACTCTA  
TAGAGAAGGCATTGAGAGAAATCATGGTAGGAGAGGAAGCTGAGGAGAGGAGAAACAGAGCACAG

AAGTTGAAGGCGATGGCATGGAAGGCTGTCTGAAGAAGGGGGTTCATCTTATTCTGATCTAAGTGCCT  
AATAAATGAGCTTAGGGTTTATCGCACTTAA

MNMAAEDQQLHVVFPPFLAHGHMPTLDVVRLFACHGVRVTIITPLNAHIFNKAVETATKMGARVVDV  
ELFRPAEEAGLPEGFENLELVKEDDMIVKFIAASELLREQLEPYLEKTRPNCLVADMFFPWATECAAKFDI  
PRLVFHGTNFFYLCASEIIRLYEPYKNVSSDEEPFALPSLPHEIQMTRLQLPEDLWKYEESDFKRRIALIHES  
EVASYGVIVNSFYELEPDYADFFGKELGRRAWHIGPALLCNRSTKNKAQRLKQPDLEHECLKWLNSRK  
PNSVIYICFGSTAHVIGPQLHEIAVALEASEQAFIWVVKNEYEKSAEWLPTVFEERLEQRGLIKGWAPQV  
LILEHEAIGAFVTHCGWNSILEGISAGVPVVTWPVFAEQFYNERFVTQILKIGVPIGSKKWGIVTTTEYMV  
KRDSIEKALREIMVGEEAEERRNRAQKLKAMAWKAVEEGSSYSDLSALINELRVYRT

>HU01G00157.1-R

ATGGGTGCTGAACCTCAACAACCTCCATGCAGTGTTCTTCCCCTTCATGGCCCATGGCCACATGATCCC  
AACCTGGACATCGCGAGGCTCTTTGCATCTCGCGGTGTCAGATCAACCATCATCACCACCCCTCTCA  
ACGCGCCCATCTTCACCAAGGCCATCGACAAGGCCAAGAGGACGGGAACCCCTGTGATTGACATTGA  
GGTTTTCAGGTTCCCAGCCAAAGAAGCCGGCCTACCTGAAGGAAGTGAAAACCTTGATGAAGCATTG  
GGTCATGAGTTTCTAAGGAAATTCATAAATGCTTCGGAGTTGCTGCGTGAGCAGCTCGAGCAGTATTT  
GGATAAGACGCGGCCCAATTGCCTTGTGGCCGATGTGTTCTTCCCATGGGCAACTGAGTCTGCATCCA  
AGTTCAACATCCCTAGGCTAGTGTTCCATGGGACTAGCTTCTTTGCGCTTTGTGCTGGAGAAATTATTA  
ACCGGTATGAGCCTTATAAGAATGTATCCTCAGATGAGGAGCTGTTCACTCTTCCTTCGCTTCCCCATG  
AGATACAGCTGACAAGGCTGCAACTTCCGGAGGATCTATGGAAGTACGAGGAAAGTGATTGGATGAA  
GAGATCAAGACTAATCAAGGAATCAGAAGTTAAGAGCTATGGAGTCCTTGTGAACAGCTTTTATGAGT  
TGGAACCAGATTATGCAGATTTCTACAGGAATGAATTGGGTAGGAAAGCATGGCATATTGGCCCTGTA  
GTACTCTGTAATCGAAGCATCGAGGACAAGGCTCAGCGAGGAAAACCACCAGCTGTAGATGAGCACG  
AATGCCGAAAATGGCTTGACTCGAGGAAGCCCAACTCAGTCATTTACGTCTGTTTTGGAAGCACCGC  
GCATGTCATAGGCCCTCAGCTGCATGAGATTGCAGTGGCATTGGAATCCTCAGAACTAGCATTTCATATG  
GGTTGTGAAGAACGAAGACTATGAAAAGAGTGCAGAGTGGCTGCCCCCAGGACTCGAAGAGCAGGT  
CCAACGAAGAGGTCTGATAATAAAAGGGTGGGCTCCTCAGGTGCTTATTTTGGAGCATGAAGCCATAG  
GAGCATTCGTGACTCACTGTGGGTGGAAGTTCGACACTAGAAGGGATCTCAGCTGGTGTCCCAATGGT  
TACATGGCCTGTTTTTGCAGAGCAATTCTACAACGAAAAGCTGGTGACTCAGATTTTGAAGATTGGAG  
TGCCTGTTGGATCTAAGAAGTGGAGTATTGTGGCTTCGACAGAGTACATGGTGAAGCAGGATGCCATC  
GAGAAGGCATTAAGAGAAGTTATGGAGGGCGAGGAAGCTGAAGAGAGGAGAAACAGGGCAAACAA  
GTTGAAGGAAATGGCCTGGAAGGCTGTTGAAGAAGGTGGTTCATCATATTACAGCTTAACAGCATTGA  
TCCATGAGTTGAGGGTTTATCGCACTTAA

MGAEPQQLHAVFFPFMAHGHMPTLDIARLFASRGVRSTIITPLNAPIFTKAIDKAKRTGTPVIDIEVFRFP  
AKEAGLPEGSENLEALGHEFLRKFINASELLREQLEQYLDKTRPNCLVADVFFPWATESASKFNIPRLVF  
HGTSFFALCAGEIINRYEPYKNVSSDEELFTLPSLPHEIQLTRLQLPEDLWKYEESDWMKRSRLIKESEVKS  
YGVLVNSFYELEPDYADFYRNELGRKAWHIGPVVLCNRSIEDKAQRGKPPAVDEHECRKWLDNRKPNPNSVI

YVCFGSTAHVIGPQLHEIAVALESSELAFIWVVKNEDYEKSAEWLPPGLEEQVQRRGLIKGWAPQVLILE  
HEAIGAFVTHCGWNSTLEGISAGVPMVTWPVFAEQFYNEKLVTQILKIGVPVGSKKWSIVASTEYMKQ  
DAIEKALREVMEGEEAEERRNRANKLKEMAWKAVEEGSSYSDLTALIHCLRVRT

>HU01G00157.1-W

ATGGGTGCTGAACCTCAACAACCTCCATGCAGTGTTCTTCCCCTTCATGGCCCATGGCCACATGATCCC  
AACCTGGACATCGCGAGGCTCTTTGCATCTCGCGGTGTCAGATCAACCATCATCACCACCCCTCTCA  
ACGCGCCCATCTTACCAAGGCCATCGACAAGGCCAAGAGGACGGGAACCCCTGTGATTGACATTGA  
GGTTTTCAGGTTCCCAGCCAAAGAAGCCGGCCTACCTGAAGGAAGTGAAAACCTTGATGAAGCATTG  
GGTCATGAGTTTCTAAGGAAATTCATAAATGCTTCGGAGTTGCTGCGTGAGCAGCTCGAGCAGTATTT  
GGATAAGACGCGGCCCAATTGCCTTGTGGCCGATGTGTTCTTCCCATGGGCAACTGAGTCTGCATCCA  
AGTTCAACATCCCTAGGCTAGTGTTCCATGGGACTAGCTTCTTTGCGCTTTGTGCTGGAGAAATTATTA  
ACCGGTATGAGCCTTATAAGAATGTATCCTCAGATGAGGAGCTGTTCACTCTTCTTCGCTTCCCCATG  
AGATACAGCTGACAAGGCTGCAACTTCCGGAGGATCTATGGAAGTACGAGGAAAGTGATTGGATGAA  
GAGATCAAGACTAATCAAGGAATCAGAAGTTAAGAGCTATGGAGTCCTTGTGAACAGCTTTTATGAGT  
TGGAACCAGATTATGCAGATTTCTACAGGAATGAATTGGGTAGGAAAGCATGGCATATTGGCCCTGTA  
GTACTCTGTAATCGAAGCATCGAGGACAAGGCTCAGCGAGGAAAACCACCAGCTGTAGATGAGCACG  
AATGCCGAAAATGGCTTGACTCGAGGAAGCCCAACTCAGTCATTTACGTCTGTTTTGGAAGCACCGC  
GCATGTCATAGGCCCTCAGCTGCATGAGATTGCAGTGGCGTTGGAATCCTCAGAACTAGCATTTCATATG  
GGTTGTGAAGAACGAAGACTATGAAAAGAGTGCAGAGTGGCTGCCCCCAGGACTCGAAGAGCAGGT  
CCAACGAAGAGGTCTGATAATAAAAGGGTGGGCTCCTCAGGTGCTTATTTTGGAGCATGAAGCCATAG  
GAGCATTCGTGACTCACTGTGGGTGGAAGTTCGACACTAGAAGGGATCTCAGCTGGTGTCCCAATGGT  
TACATGGCCTGTTTTTGCAGAGCAATTCTACAACGAAAAGCTGGTGACTCAGATTTTGAAGATTGGAG  
TGCCTGTTGGATCTAAGAAGTGGAGTATTGTGGCTTCGACAGAGTACATGGTGAAGCAGGATGCCATC  
GAGAAGGCATTAAGAGAAGTTATGGAGGGCGAGGAAGCTGAAGAGAGGAGAAACAGGGCAAACAA  
GTTGAAGGAAATGGCCTGGAAGGCTGTTGAAGAAGGTGGTTCATCATATTACAGCTTAACAGCATTGA  
TCCATGAGTTGAGGGTTTATCGCACTTAA

MGAEPQQLHAVFFPFMAHGHMIPITLDIARLFASRGVVRSTIITPLNAPIFTKAIDKAKRTGTPVIDIEVFRFP  
AKEAGLPEGSENLDALGHEFLRKFINASELLREQLEQYLDKTRPNCLVADVFFPWATESASKFNIPRLVF  
HGTSFFALCAGEIINRYEPYKNVSSDEELFTLPSLPHEIQLTRLQLPEDLWKYEESDWMKRSRLIKESEVKS  
YGVLVNSFYELEPDYADFYRNELGRKAWHIGPVVLCNRSIEDKAQRGKPPAVDEHECRKWLDNRKPNPNSVI  
YVCFGSTAHVIGPQLHEIAVALESSELAFIWVVKNEDYEKSAEWLPPGLEEQVQRRGLIKGWAPQVLILE  
HEAIGAFVTHCGWNSTLEGISAGVPMVTWPVFAEQFYNEKLVTQILKIGVPVGSKKWSIVASTEYMKQ  
DAIEKALREVMEGEEAEERRNRANKLKEMAWKAVEEGSSYSDLTALIHCLRVRT

>>HU03G00258.1-R

ATGGGTGCTGAGCCTCAACAACCTCCATGTAGCTTTCTTCCCCTTTCATGGCTCATGGCCACATGATCCCC  
ATCCTCGACATAGCGAGGCTCTTTGTGGCTCGTGGGGTCAAGGCAACCATCATAACCACCCCGCTTAA

TGTGCCTGTCTTCACAAGGGCCATTGACAAAGGAAGAAAGAAACCAGGGAGCACAGGGATCAACAT  
TGAGGTTTTTCACTGCCAGCACGAGAAGCTGGCTTACCAGAAGGGTGTGAGAATCTGGATCAAGCA  
ATAGCCATGGGTATAGCCCCGGTGTATTTAAGGCTTCGGAGATGCTCCAGGACCAGCTAGAGCGGTT  
CTTGGAGCAGACCCGCCCAACTGCATTGTGGCCGATATGTTCTTCGCATGGGTAACTGACTCCGCAG  
ACAAGTTCAATGTCCCCGGCTAGTTTTCCATGGGATCAGCTTTTTTTCCCTTTGTGCAGAAGAGATGG  
TCGTGCTACATGAGCCTCACAAGAATGTTTCTTCTGATGAGGAGCCCTTGGTTCTTCCTTACCTCCCAC  
ACGAGGTGAAGTTGACAAGGTTGCAGCTCCAGATTGTGTCATGAACCAGGAGAGCGAATTTGGGAA  
CAGATTAAAAAAGATCAGGGAATCTGAGCTCAAGAGTTATGGGGTGCTTGTTAACAGTTTCTATGAGT  
TAGAACCAGACTATGCAGAGCTCTACAGGAAAGAGTTGGGAAGGAGAGCATGGCACATAGGCCCTGT  
TTCCTCTGCAATAGGAGCATTGAGGATAAGGCTTGGAGGGGGAAGCAAGCTTCCTTAGACAAACAC  
GAGTGGTTGAATTGGCTCAACTTGAAGAAACCCAACTCCGTCATTTATATCAGTTTCGGGAGTATGGC  
AAACGTGATAGCTCCTCAGTTGCACGAGATTGCTCTGGCTCTAGAAGCTGCTGGCCAAGACTTCATCT  
GGGTCGTGAGGAACAGCGATGGGCAGGAAGAAGAGTGGTTGCCACAAGGGTTCGAACAGAGGATG  
GAAGGAAAAGGTCTGATAATAAGAGGGTGGGCCCCACAGGTGTTGATTTTGGAGCATGAGGCTGTGG  
GAGCCTTTGTGACTCACTGTGGGTGGAACCTCGACAATTGAGAGTATAAGCAGTGGGAAGCCCATGGT  
TACATGGCCTTTGTTTCGCCGAGCAATTCTATAATGAGAAATTAGTGACTCACATT**TTGAAAAGTGGGGT**  
**CTCCGTTGGAGTTAAGAAGTGGAGCAAAGAGCCTTCCTAGAGAATGTGGTGAAGCGCGATGCCATA**  
**GAGAAGGCACTGAGAGAGATAATGGCAGGAGAGGAGGCAGAAGAGAGGAGAAGCAGAGCCAAGA**  
**AGTTGAAGGAGATGGCATGGAAGGCAGTTGAAGAAGGTGGCTCATCATACTGTGATTAACTGCTTTG**  
ATAAATGGATTGCAGAATTATCGTGCTTAA

MGAEPQQLHVAFPPFMAHGHMIPILDIARLFVARGVKATIITPLNVPVFTRAIDKGRKKPGSTGINIEVFT  
LPAREAGLPEGCENLDQAIAMGIAPVLFKASEMLQDQLERFLEQTRPNCIVADMFFAWVTDSADKFNVPR  
LVFHGISFFSLCAEEMVVLHEPHKNVSSDEEPLVLPYLPHEVKLTRLQLPDCVMNQESEFGNRLKKIRESE  
LKSYGVLVNSFYELEPDYAELYRKELGRRAWHIGPVSLCNRSIEDKAWRGKQASLDKHEWLNWLNKKP  
NSVIYISFGSMANVIAPQLHEIALALEAAGQDFIWVVRNSDGQEEEWLPQGFEQRMKGGLIIRGWAPQV  
LILEHEAVGAFVTHCGWNSTIESISSGKPMVTWPLFAEQFYNEKLVTHILKTGVSVGVKKWSKEPSLENV  
VKRDAIEKALREIMAGEEAEERRSRAKKLKEMAWKAVEEGSSYCDLTALINGLQNYRA

>HU03G00258.1-W

ATGGGTGCTGAGCCTCAACAACCTCCATGTAGCTTTCTTCCCTTTCATGGCTCATGGCCACATGATCCCC  
ATCCTCGACATAGCGAGGCTCTTTGTGGCTCGTGGGGTCAAGGCAACCATCATAACCACCCCGCTTAA  
TGTGCCTGTCTTCACAAGGGCCATTGACAAAGGAAGAAAGAAACCAGGGAGCACAGGGATCAACAT  
TGAGGTTTTTCACTGCCAGCACGAGAAGCTGGCTTACCAGAAGGGTGTGAGAATCTGGATCAAGCA  
ATAGCCATGGGTATAGCCCCGGTGTATTTAAGGCTTCGGAGATGCTCCAGGACCAGCTAGAGCGGTT  
CTTGGAGCAGACCCGCCCAACTGCATTGTGGCCGATATGTTCTTCGCATGGGTAACTGACTCCGCAG  
ACAAGTTCAATGTCCCCGGCTAGTTTTCCATGGGATCAGCTTTTTTTCCCTTTGTGCAGAAGAGATGG  
TCGTGCTACATGAGCCTCACAAGAATGTTTCTTCTGATGAGGAGCCCTTGGTTCTTCCTTACCTCCCAC  
ACGAGGTGAAGTTGACAAGGTTGCAGCTCCAGATTGTGTCATGAACCAGGAGAGCGAATTTGGGAA



CAGATTTAAAAAGATCAGGGAATCTGAGCTCAAGAGTTATGGGGTGCTTGTTAACAGTTTCTATGAGT  
TAGAACCAGACTATGCAGAGCTCTACAGGAAAGAGTTGGGAAGGAGAGCATGGCACATAGGCCCTGT  
TTCACCTCTGCAATAGGAGCATTGAGGATAAGGCTTGGAGGGGGAAGCAAGCTTCCTTAGACAAACAC  
GAGTGGTTGAATTGGCTCAACTTGAAGAAACCCAACTCCGTCATTTATATCAGTTTCGGGAGTATGGC  
AAACGTGATAGCTCCTCAGTTGCACGAGATTGCTCTGGCTCTAGAAGCTGCTGGCCAAGACTTCATCT  
GGGTCGTGAGGAACAGCAATGGGCAGGAAGAAGAGTGGTTGCCACAAGGGTTCGAACAGAGGATG  
GAAGGAAAAGGTCTGATAATAAGAGGGTGGGCCCCACAGGTGTTGATTTTGGAGCATGAGGCTGTGG  
GAGCCTTTGTGACTCACTGTGGGTGGAACCTGACTCTTGAAGGGATCTCAGCTGGAGTGCCAATGGT  
TACATGGCCTTTGTTTCGCCGAGCAATTCTATAATGAGAAATTAGTGAATCACATT**TTGAAAAGTGGGGT**  
**CTCCGTTGGAGTTAAGAAGTGGAGCAAAGAGCCTTCCTAGAGAATGTGGTGAAGCGCGATGCCATA**  
**GAGAAGGCACTGAGAGAGATAATGGCAGGAGAGGAGGCAGAAGAGAGGAGAAGCAGAGCCAAGA**  
**AGTTGAAGGAGATGGCATGGAAGGCAGTTGAAGAAGGTGGTTCATCATACTGTGATTAACTGCTTTG**  
ATAAATGGATTGCAGAATTATCGTGCTTAA

MGAEPQQLHVAFPPFMAHGHMIPILDIARLFVARGVKATIITPLNVPVFTRAIDKGRKKPGSTGINIEVFT  
LPAREAGLPEGCENLDQAIAMGIAPVLFKASEMLQDQLERFLEQTRPNCIVADMFFAWVTDSADKFNVPR  
LVFHGISFFSLCAEEMVVLHEPHKNVSSDEEPLVLPYLPHEVKLTRLQLPDCVMNQESEFGNRFKKIRESE  
LKSYGVLVNSFYELEPDYAELYRKELGRRAWHIGPVSLCNRSIEDKAWRGKQASLDKHEWLNWLNKLP  
NSVIYISFGSMANVIAPQLHEIALALEAAGQDFIWVVRNSNGQEEEWLPQGFEQRMKGGLIIRGWAPQV  
LILEHEAVGAFVTHCGWNSTLEGISAGVPMVTWPLFAEQFYNEKLVTHILKTGVSVGKWSKEPSLEN  
VVKRDAIEKALREIMAGEEAEERRSRAKKLKEMAWKAVEEGSSYCDLTALINGLQNYRA

>HU03G00266.1-R

ATGGCTTCAGAACAAACCCAGTTCCACATATTCTTCCTTCCTTACCTTGTCCTCAGGCCATATGATCCCA  
ACTCTGGACTTGCCAGATTATTTGCTACTCGAGGCGTTAAATGCACCATCATCACCCTCCCTTAAC  
ATCCCTTTCTTTG**CTGAAGCAACCAAACTGACAGCCAAAACTTGGTATTGAAATCAACCTTTTATC**  
**AGTGAAATTCCCATATGAGGAACCAGGGTTCCTAAAGAGTGTAAGAGTACACAAAATTTCTACAAA**  
**GCCATTGCCGAGCTTCAGCACCTTTTGGGGTACTAATGGAGGAGTTCATCCCACTGCCTTGTGGC**  
**TGATTTTCAGTTTCCTTGGGCT**GATTCTGTAGCTAAACACCTCGGAGTCCCATGTTTGTCAATTCGATGG  
ATGCAGTTACATTTATCCGTGTGTTTCTTCGAATCTGAATCGATACCAACCGCACAAGGCGGTTTCATC  
TGATTGAGAGCATTTTGTGGTTCCAGGCCTTCACATGAAGTAAAGCTAAGGAGGGCAGAATTGGCAC  
CTTATGAAAAAGTAGAGTCTGAGAAGTGGATGATTGAGCTGGTTGATCGGATGTGGGCGGGGCAGAG  
GGAGTGTTACGGGGTGATCAAGAACAGTTTCTATGAGTTAGAGCCTGATTATGCTGATTACTATGAAA  
ATAACCTGGGATTCACACACTGGCACATTGGCCCGCTTTTTCTCTACTTCGAGGGCAAAGGAAGTGAC  
TGTTATCAGATAGGAAAGAAATCCTCCGTTGATGTAGAGGAATGCTTAAGATGGCTTGATGAGAAACC  
GGACAATTCAGTCATTTATGTCTGCTTCGGTAGCATGTCAAATGTGGCATATGCCAGCTAGATGAGAT  
TGCCAGAGCACTTGAATCTCTAGCCCAAGATTTATCCTAGTAGTAAGGAACAAGGAGGACACCAAT  
GGGTGGGTCCTGGATGGGTTTCGAGGATAGGGTTAAAGGGCAAGGTCTGGCTATAAGAGGTTGGGCCC  
CCCAACGGCTCATCCTCGAGCATCAAGCTGTTGGTGGGTTTCGTGACTCATTGTGGGTGGAACCTCGATT

CTCGAAGGAGTGGTGGCTGGCCTGCCCATGGTGACATGGCCGCGCCATGCTGAGCAGTTTTACAATG  
AGAAATTGGTCACCAATGTTCTCAGAATCGGGGTTCTGTTGGAGTGAAGGGATGGGCTGGGACTCT  
AGATGAAAATGGGGATGTGATTGGGAAGGATGAAATTGTGACGGCCATAAGTAAGATAGTGGTTGGG  
AAAGAAGCTGAGGATATGAGGAAGAGGGCTCAAGAACTCAAGAAAATGGCAAGGAGGGCTATTCAA  
GAAGAGGGATCATCATACTCAGATTTGACTGCTCTGATTGAAGAACTGAAGGCGTGCACTATGTCACA  
AAGAATTTGA

MASEQTQFHIFLPYLVPGHMIPTLDLARLFATRGVKCTIITPLNIPFFAEATKTDSQKLGIEINLLSVKFPY  
EETGFPKECKSTQNFYKAI AELQHPFGVLMEEFHPNCLVADFQFPWADSVAKHLGVPCLSFDCSYIYPCV  
SSNLNRYQPHKAVSSDSEHFVVPGLPHEVKLRRAELAPYEKVESEKWMIELVDRMWAGQRECYGVIKNS  
FYELEPDYADYYENNLGFTHWHIGPLFLYFEGKGSDCYQIGKKSSVDVEECLRWLDEKPDNSVIYVCFGS  
MSNVAYAQLDEIARALESLAQDFILVVRNKEDTNGWVLDGFEDRVKGGQLAIRGWAPQRLILEHQAVGG  
FVTHCGWNSILEGVVAGLPMVTWPRHAEQFYNEKLVNTNVL RIGVPVGVKGWAGTLDENGDVIGKDEIV  
TAISKIVVGKEAEDMRKRAQELKKMARRAIQEEGSSYSDLTALIEELKACTMSQRI

>HU03G00266.1-W

ATGGCTTCAGAACAAACCCAGTTCCACATATTCTTCCTTCCTTACCTTGTCCTCAGGCCATATGATCCCA  
ACTCTGGACTTGCCAGATTATTTGCTACTCGAGGCGTTAAATGCACCATCATCACCCTCCCTTAAC  
ATCCCTTTCTTTGCTGAAGCAACCAAACTGACAGCCAAAACTTGGTATTGAAATCAACCTTTTATC  
AGTGAAATTCCCATATGAGGAACCAGGGTTCCCAAAGAGTGTAAAGAGTACACAAAATTTCTACAAA  
GCCATTGCCGAGCTTCAGCACCTTTTGGGGTACTAATGGAGGAGTTCCATCCCAACTGCCTTGTGGC  
CGATTTTCAGTTTCCTTGGGCTGATTCTGTAGCTAAACACCTCGGAGTCCCATGTTTGTCAATTCGATGT  
ATGCAGTTACATTTATCCGTGTGTTTCTTCGAATCTGAATCGATACCAACCACACAAGGCGGTTTCATC  
TGATTACAGAGCATTTTGTGGTTCCAGGCCTTCACATGAAGTAAAGCTAAGGAGGGGCAGAATTGGCAC  
CTTATGAAAAAGTAGAGTCTGAGAAGTGGATGATTGAGCTGGTTGATCGGATGTGGGCGGGGCAGAG  
GGAGTGTTACGGGGTGATCAAGAACAGTTTCTATGAGTTAGAGCCTGATTATGCTGATTACTATGAAA  
ATAACCTGGGATTCACACACTGGCACATTGGCCCGCTTTTTCTCTACTTCGAGGGCAAAGGAAGTGAC  
TGTTATCAGATAGGAAAGAAATCCTCCGTTGATGTAGAGGAATGCTTAAGATGGCTTGATGAGAAACC  
GGACAATTACAGTCATTTATGTCTGCTTCGGTAGCATGTCAAATGTGGCATATGCCCAGCTAGATGAGAT  
TGCCAGAGCACTTGAATCTCTAGCCCAAGATTTATCCTGGTAGTAAGGAACAAGGAGGACACCAAT  
GGGTGGGTCCTGGATGGGTTTCGAGGATAGGGTTAAAGGGCAAGGTCTGGTTATAAGAGGTTGGGCCC  
CCCAACGGCTCATCCTCGAGCATCAAGCTGTTGGTGGGTTTCGTGACTCATTGTGGGTGGAACCTCGATT  
CTCGAAGGAGTGGTGGCTGGCCTGCCCATGGTGACATGGCCGCGCCATGCTGAGCAGTTTTACAATG  
AGAAATTGGTCACCAATGTTCTCAGAATCGGGGTTCTGTTGGAGTGAAGGGATGGGCTGGGACTCT  
AGATGAAAATGGGGATGTGATTGGGAAGGATGAAATTGTGACGGCCATAAGTAAGATAGTGGTTGGG  
AAAGAAGCTGAGGATATGAGGAAGAGGGCTCAAGAACTCAAGAAAATGGCAAGGAGGGCTATTCAA  
GAAGAGGGATCATCATACTCAGATTTGACTGCTCTGATTGAAGAACTGAAGGCGTGCACTATGTCACA  
AAGAATTTGA

MASEQTQFHIFLPPYLVPGHMIPTLDLARLFATRGVKCTIITPLNIPFFAEATKTDSQKLGIEINLLSVKFPY  
EPPGFPKECKSTQNFYKAI AELQHPFGVLMEEFHPNCLVADFQFPWADSVAKHLGVPCLSFDFVCSYIYPCV  
SSNLNRYQPHKAVSSDSEHFVVPGLPHEVKLRRAELAPYEKVESEKWMIELVDRMWAGQRECYGVIKNS  
FYELEPDYADYYENNLGFTWHWHIGPLFLYFEGKGSDCYQIGKKSSVDVEECLRWLDEKPDNSVIYVCFGS  
MSNVAYAQLDEIARALESLAQDFILVVRNKEDTNGWVLDGFEDRVKGGQLVIRGWAPQRLILEHQAVGG  
FVTHCGWNSILEGVVAGLPMVTWPRHAEQFYNEKLVNTNVLRIQVPGVKGWAGTLDENGDVIGKDEIV  
TAISKIVVGKEAEDMRKRAQELKKMARRAIQEEGSSYSDLTALIEELKACTMSQRI

>HU03G00267.1-R

ATGGCTTCAGAAGAGGACCAACTTCACATATTTTTCCTACCCTTCATGGCTCAAGGCCATGTGATCCCA  
ATGATTGACACGGCCAGATTATTCGCCACTCGTGGCGTCAAATGCACCATAGTCACCACTTCTTCGTTT  
GCTGAGACCATCAACCTGGATAACCAAAATCTTGGGATTCAAATTAACCTCCAAACCATGAAATTCCC  
CGCTAAGGAAGCAGGGCTCCCAGAAGGGTGTGAAAGTACAGATTCCATCTCCGGCCCTGAAATGTTC  
CACAATTTCTTCAAAGGCCTTTCTCTTCTTCAACACCCATTAGAGAACTTAGTCGAAACTTTGCGACCT  
GATTGTCTGGTAGCTGATGCCTTCTCCCTTGGGCTAATCCACTGCTGAGAAGTTCGGAATCCCTCGT  
TTATGCTTCCATGGATGTGGGTACCTCTCTGAGTGCATCAGTTACAACTTAATTATGCACCAACCACTC  
AAGAACATTTTCATCATCAGGTTTCAGACACTTTAGTTGTTTCTGCTGTAATCTGCCTCATGAGATCAAGCTG  
ATGATATCTGAACTGTCTCCCTTCGACAAGGGGGCATGTTCAAAGGCTTTTCTTGACTTAAGGGATGA  
AATTATAGAGGCAAAAAGGTCATGTCATGGGTGGATCATGAATAGCTTTTATGAGCTCGAAACATCTTA  
TGTTGATTACTTTGAGAAGGAATTGGGGTTCAAACACTGGCATATCGGCCCCCTTGCGCTCTATTTTAA  
GGATCAGATCAGAGGGAAGAAGTCCTCCATTGATTTGGAGGGATGCTTGAAATGGCTAGACCAAAAA  
GAGGCCAATTCAGTTATTTACATTTGCTTTGGGAGCTTCTTAGATGTGCCAGATGCTCAGCTTCATGAG  
ATAGCCTTAGCTCTTGAAGCTTTGGGTCAAATTTTATCTTAGTGGTGAGGAAAGACTCTGACAATTG  
GATGCCACAAGGATTTAAGGACAGGGTGAAAGAGCAAGGCTTGATAATCCGAGGGTGGGCCCCCTCAA  
GTGCTAATTTTGAACCACCGAGCTGTGGGAGGGTTTGTGACTCATTGTGGGTGGAACCTCGGTGTTAGA  
AGGAGTCACTGCGGGTGTGCCAATGGTGACATGGCCTCTTCATGCTGAGCAGTTTTTACAATGAGAAA  
CTGGTGACTCAAGTTCTCAGGATTGGCATTCAAGTCGGGGCCAAAAAATGGGTGCGAGATTTGAGG  
ATCAAAATATTCTCAGCAGCGAAACGATATTGATGGCTATGAGAGGGGTAATGGCTGGAGAGGAAGCT  
CAGGACATGAGAAACAGGGCAGTGGAGCTCAAAGAAATGGCCAAGAGGGCTGTTTCTGAAGGAGGT  
TCATCCTCCTCTGCAATAAATAACTTGATTGCAGAAATTAAATCTTACAAGATTGA

MASEEDQLHIFLPPFMAQGHVIPMIDTARLFATRGVKCTIVTSSFAETINLDNQNLGIQINLQTMKFPKE  
AGLPEGCESTDSISGPEMFHNFFKGLSLLQHPLENLVETLRPDCLVADAFPPWANSTA EKFGIPRLCFHGC  
YLSECSYNLIMHQPLKNISSGSDTLVVPGNLPHEIKLMISELSPFDKGACSKAFLDLRDEIIEAKRSCHGW  
IMNSFYELETSYVDYFEKELGFKHWHIGPLALYFKDQIRGKKSSIDLEGCLKWLDQKEANSVIYICFGSFL  
DVPDAQLHEIALALEALGQNFILVVRKDSDNWMPQGFKDRVKEQGLIIRGWAPQVLILNHRVGGFVTH  
CGWNSVLEGVTAGVPMVTWPLHAEQFYNEKLVTVLRIGIQVGAKKWVARFEDQNILSSETILMAMRG  
VMAGEEAQDMRNRARELKE MAKRAVSEGGSSSSAINNLIAEIKSYKI

>HU03G00267.1-W

ATGGCTTCAGAAGAGGACCAACTTCACATATTTTTCCTACCCCTTCATGGCTCAAGGCCATGTGATCCCA  
ATGATTGACACGGCCAGATTATTCGCCACTCGTGGCGTCAAATGCACCATAGTCACCACTTCTTCGTTT  
GCTGAGACCATCAACCTGGATAACCAAAATCTTGGGATTCAAATTAACCTCCAAACCATGAAATTCCC  
CGCTAAGGAAGCAGGGCTCCCAGAAGGGTGTGAAAGTACAGATTCCATCTCCGGCCCTGAAATGTTT  
CACAATTTCTTCAAAGGCCTTTCTCTTCTTCAACACCCATTAGAGAACTTAGTCGAAACTTTGCGACCT  
GATTGTCTGGTAGCTGATGCCTTCTTCCCTTGGGCTAATTCCACTGCTGAGAAGTTCGGAATCCCTCGT  
TTATGCTTCCATGGATGTGGGTACCTCTCTGAGTGCATCAGTTACAACCTAATTATGCACCAACCACTC  
AAGAACATTTTCATCATCAGGTTTCAGACACTTTAGTTGTTTCTGGTAATCTGCCTCATGAGATCAAGCTG  
ATGATATCTGAACTGTCTCCCTTCGACAAGGGGGCATGTTCAAAGGCTTTTCTTGACTTAAGGGATGA  
AATTATAGAGGCAAAAAGGTCATGTCATGGGTGGATCATGAATAGCTTTTATGAGCTCGAAACATCTTA  
TGTTGATTACTTTGAGAAGGAATTGGGGTTCAAACACTGGCATATCGGCCCCCTTGCGCTCTATTTTAA  
GGATCAGATCAGAGGAAGAAGTCCTCCATTGATTTGGAGGGATGCTTGAAATGGCTAGACCAAAAA  
GAGGCCAATTCAGTTATTTACATTTGCTTTGGGAGCTTCTTAGATGTGCCAGATGCTCAGCTTCATGAG  
ATAGCCTTAGCTCTTGAAGCTTTGGGTCAAAATTTTATCTTAGTGGTGAGGAAAGACTCTGACAATTG  
GATGCCACAAGGATTTAAGGACAGGGTGAAAGAGCAAGGCTTGATAATCCGAGGGTGGGCCCCCTCAA  
GTGCTAATTTTGAACCACCGAGCTGTGGGAGGGTTTGTGACTCATTGTGGGTGGAACCTCGGTGTTAGA  
AGGAGTCACTGCGGGTGTGCCAATGGTGACATGGCCTCTTCATGCTGAGCAGTTTTACAATGAGAAA  
CTGGTGACTCAAGTTCTCAGGATTGGCATTCAAGTCGGGGCCAAAAAATGGGTGCGAGATTTGAGG  
ATCAAAATATTCTCAGCAGCGAAACGATATTGATGGCTATGAGAGGGGTAATGGCTGGAGAGGAAGCT  
CAGGACATGAGAAACAGGGCAGTGGAGCTCAAAGAAATGGCCAAGAGGGCTGTTTCTGAAGGAGGT  
TCATCCTCCTCTGCAATAAATAACTTGATTGCAGAAATTAAATCTTACAAGATTTGA

MASEEDQLHIFFLPFMAQGHVIPMIDTARLFATRGVKCTIVTSSFAETINLDNQNLGIQINLQTMKFPAKE  
AGLPEGCESTDSISGPEMFHNFFKGLSLLQHPLENLVETLRPDCLVADAFFPWANSTAЕКFGIPRLCFHGCG  
YLSECISYNLIMHQPLKNISSGSDTLVVPGNLPHEIKLMISELSPFDKGACSKAFLDLRDEIIEAKRSCHGW  
IMNSFYELETSYVDYFEKELGFKHWHIGPLALYFKDQIRGKKSSIDLEGCLKWLDQKEANSVIYICFGSFL  
DVPDAQLHEIALALEALGQNFILVVRKDSDNWMPQGFKDRVKEQGLIIRGWAPQVLILNHRVGGFVTH  
CGWNSVLEGVTAGVPMVTWPLHAEQFYNEKLVTQVLRIGIQVGAKKWVARFEDQNILSSETILMAMRG  
VMAGEEAQDMRNRARELКEMAKRAVSEGGSSSSAINNLIAEIKSYKI

>HU10G00514.1-R

ATGGGTGCTGAACGTAGTCAACTACATGTAGCTTTCTTCCCTTGGATGGCCCCCTGGCCACACCATCCC  
AATGATCGACATGGTTCGCCTATTTGCAGCGCGCCATGTGAAAACAACCGTCATAACCACCCCTTTGA  
ATGCCCCAACTTCGCCAAGTCTCTCAACGGCACTGCTGCCACCCTTGAAATATTCACATTTCCCTCC  
AACAAAGTCGGCCTCCCTCAAGGCATTGAGAACGTGGAGGATTGCACTTCTCCTGAAATGACCATGA  
ATTTCATGAGAGGGACTCAACTGCTTCGAGGTCCCCTCGAGGAGTTCTTGAGAGAAGACCCGGCCTGA  
TTGCCTCATAGCTGATGCTTTCTTCCCTTCGCAAGTGAATCTGCCGCTGGATTGGTGTCCTATGCTA

GTCTTTCATGGGACTAGCTTCTTTGCCCTTTGTGCTAATGTGATTTTGTTTAAACATAAGCCTTTTATGT  
CAGTTTCATCCAATGATGACTACTTTGTGCATCCCAAATCTGCCTCATTTAATTAGGTTACGCGGTTGCA  
AATACCTCCTGAGATGCGTGAAAATAAGGAGAGTGACGTGTAAAGGATTGTGGAAGCAGGTTTCTCT  
CTCTCCATAGAAGTTATGGTACTATTGTCAATAGCTTCTATGAGCTTGAGCCAGAATATGCTGATTATTAT  
AGGAAGGTGTTGGGGAGAAGGGCATGGCATATAGGCCCTCTTCCCTATGTAACAAGGATTTTGAGGG  
TAAGTCTCAAAGAGGGCATAAAGCTTCAATCAACGGGCACGAGTGCCTAAAATGGCTTGATTCTAAG  
GAACCCAACTCAGTTATTTATGTTTGTGTTTGGGAGCCGGACTCGATTTTCATCCTCTCAACTTCGTGAG  
ATTGCGATGGCTTTTGAGGCTTCAGGGCAACAATTCATTTGGGTTGTAAAGAAGCCTATGAATGAAGA  
GGAAGACAAGGGTAATGAACCATGGTTGCCAGAAGGGTTCGAGAAGAGGACCAGAGATCAGGGACT  
CATCATAAGAGGATGGGCACCCCAAGTGTTAATTTTGAGCATGAAGCCATAGGAGGGTTCGTGACTC  
ATTGTGGATGGAACCTCGACATTGGAAGGCATAACGGCTGGTGTGCCCATGGTCACTTGGCCAGTGTTT  
GCTGAACAGTTTTTTAACGAAAAGTTGGTGACTGAGATTTTGAAGGTTGGGATTCCCATTGGGGTTAA  
AGAGTGGAGTGTGCAAGTTGTTGAAAGTAATATTATTAAGCAGGAACAAATAGAGGCAGCATTCAGG  
CAACTCATGGTGGATGAAGAGGCTCTCGAGATGCGAAGCAGAGCAAAGAACTTAAGGAGATGGCA  
TGCAAGGCTATGGAAGAAGGTGGCTCGTCTCACTCTGATCTCTGTGCCTTGTTGCAAGACTTGAGTTC  
TTCTAGCCATAACCATCATTCTTGA

MGAERSQLHVAFFPWMAPGHTIPMIDMVRLFAARHVKTTVITPLNAPNFAKSLNGTAATLEIFTFPSNKV  
GLPQGIENVEDCTSPMTMNFMRGTQLLRGPLEEFLEKTRPDCLIADAFFPFASESAAGFGVTMLVFHGTS  
FFALCANVILFKHKPFMSVSSNDDYFVIPNLPHLIRFTRLQIPPEMRENKESDVLRIVEAGFLSLHRSYGTIV  
NSFYELEPEYADYYRKVLGRRWHIGPLSLCNKDFEGKSQRGHKASINGHECLKWLDSKEPNSVIYVCF  
GSRTRFSSSQLREIAMAFEASGQQFIWVVKPMNEEDKGNPWLPEGFEKRTDQGLIIRGWAPQVLILE  
HEAIGGFVTHCGWNSTLEGITAGVPMVTWPVFAEQFFNEKLVTEILKVGIPIGVKEWSVQVVESNIIKQEQ  
IEAAFRQLMVDEEALEMRSRAKKLKEMACKAMEEGSSHS DLCALLQDLSSSSHNHHS

>HU10G00514.1-W

ATGGGTGCTGAACGTAGTCAACTACATGTAGCTTTCTTCCCTTGGATGGCCCCCTGGCCACACCATCCC  
AATGATCGACATGGTTCGCCTATTTGCAGCGCGCCATGTGAAAACAACCGTCATAACCACCCCTTTGA  
ATGCCCCAACTTCACCAAGTCTCTCAACGGCACTGATGCCACCCTTGAAATATTCACATTTCCCTCCA  
ACGAAGTCGGCCTCCCTCAAGGCATTGAGAACGTGGAGGATTGCACTTCTCCTGAAATGACCATGAA  
TTTCATGAGAGGGACTCAGCTGCTTCGAGGTCCCCTCGAGGAGTTCTTGAGAGAAGACCCGGCCTGAT  
TGCCTCATAGCTGATGCTTTCTTTCCCTTCGCAAGTGAATCTGCCGCTAGATTTGGTGTCCTATGCTA  
GTCTTTCATGGGACTAGCTTCTTTGCCCTTTGTGCTAATGTGATTTTGTTTAAACATAAGCCTTTTATGT  
CAGTTTCATCCAATGATGACTACTTTGTGCATCCCAAATCTGCCTCATTTAATTAGGTTACGCGGTTGCA  
AATACCTCCTGAGATGCGTGAAAATAAGGAGAGTGACGTGTAAAGGATTGTGGAAGCAGGTTTCTCT  
CTCTCCATAGAAGTTATGGTGCTATTGTCAATAGCTTCTATGAGCTTGAGCCAGAATATGCTGATTATTA  
TAGGAAGGTGTTGGGGAGAAGGGCATGGCATATAGGCCCTCTTCCCTATGTAATAAGGATTTTGAAG  
GTAAGTCTCAAAGAGGGAATAAAGCTTCAATCAACGGGCACGAGTGCCTAAAATGGCTTGATTCTAA  
GGAACCCAACTCAGTTATTTATGTTTGTGTTTGGGAGCTGGACTCGATTTTCATCCTCACAACTTCGTGA

GATTGCGATGGCTTTTGGAGCTTCAGGGCAACAATTCATTGGGTGTGTAAGAAACCTATGAATGAAG  
AGGAAGACAAGGGTAATGAACCATGGTTGCCAGAAGGGTTCGAGAAGAGGACCAGAGATCAGGGAC  
TCATCATAAGAGGATGGGCACCCCAAGTGTTAATTTGGAGCATGAAGCCATAGGAGGGTTCGTGACT  
CATTGTGGGTGGAACCTCGACATTGGAAGGCATAACGGCTGGTGTGCCCATGGTCACTTGGCCAGTGTT  
TGCTGAACAGTTTTTTAACGAAAAGTTGGTGACTGAGATTTGAAGGTTGGGATTCCCATTGGGGTTA  
AAGAGTGGAGTATGCAAGTTGTTGAAAGTAATATTATTAAGCAGGAACAAATAGAGGCAGCATTGAGG  
CAACTCATGGTGGATGAAGAGGCTCTCGAGATGCGAAGCAGAGCAAAGAACTTAAGGAGATGGCA  
TGCAAGGCTATGGAAGAAGGTGGCTCGTCTCACTCTGATCTCTGTGCCTTGTTGCAAGACTTGAGTTC  
TTCTAGCCATAACCATCATTCTTGA

MGAERSQLHVAFPPWMAPGHTIPMIDMVRLFAARHVKTTVITPLNAPNFTKSLNGTDATLEIFTFPSNEV  
GLPQGIENVEDCTSPMTMNFMRGTQLLRGPLEEFLEKTRPDCLIADAFFPFASESAAARFGVTMLVFHGTS  
FFALCANVILFKHKPFMSVSSNDDYFVIPNLPHLIRFTRLQIPPEMRENKESDVLRIVEAGFLSLHRSYGAI  
NSFYELEPEYADYYRKVLGRRAWHIGPLSLCNKDFEGKSQRGNKASINGHECLKWLDSKEPNSVIYVCF  
GSWTRFSSSQLREIAMAFEASGQQFIWVVKPMNEEEDKGNEPWLPEGFEKRTRDQGLIIRGWAPQVLIL  
EHEAIGGFVTHCGWNSTLEGITAGVPMVTWPVFAEQFFNEKLVTEILKVGPIGVKEWSMQVVESNIIKQE  
QIEAAFRQLMVDEEALMRSRAKKLKEMACKAMEEGSSSHSDLCALLQDLSSSSHNHHS

**B6GT**

>HU06G00241.1-R

ATGACAAAAATGGAGTTGGTGTTTGTCCCAATCCCAGGGATTGGGCACTTGCCGTCCACCGTCCAGTT  
GGCCAAGCTCATCTCCAGCGCGACCACCGTATTTCCGTGGTTGTCTAATGATCAACGTCCCTCATG  
ATGATAACGCCATAGTCAACGCTTACATTGATTCCCAGACACGTGATGCCCATCCTACCACCCGACTCA  
CCTTCATCTCCCTACCCGCGCCCGCCAGCCCGCCGACGCGTCTCCCTAAATTCTTCGCCAACATAA  
TAGAGCTCCATAAGCCCTTCGTAAAGGAGGCTGTCTCGACCGGATCCAATCCGGGTTGAGCAAGCC  
CGTCGGGTTCATAGTCGACATGTTTTGCACCACCATGATTGACGTCGCCAATGAGCTCCACGTGGCCT  
CTTACATCTTCTTACCTCCGGAGCCATACTTCTCAATTTTCATGTTCCGGATCGAATCATTGGTTGATGC  
GGACAGGGTCAACTTTGCGGATGAGTTCCGTGCGGACCCGATAAAGAAATGGATGTTCCCGGGTTC  
AGGAACCGGGTACCGGGAAAGGTCATACCGTCGCCGTTTCTCGACAAGGAAGTTGTGTCCCAATGGA  
ATCTCAACCCCATGAGGAGGTTTAGAGAATCCAAGGGCATTCTTGTAATACGTACGCGGAGTTGGAA  
TCCTACGCCACCCAAGCGTTGCTAGAGCAGGCAGAGGACAATAAGGTCCCTGCCGTTTATCCCGTGG  
GCCCCATCTTGGTGCTCGACCGTGGGTCCCAGAAGGAGGAGGATGACTACTCCAATTCCATCATCATG  
GAGTGGCTGGACCAGCAGCCCCCTTCTCGGTGGTGTTCTGTGCTTTGGGAGCATGGGAAGCTGGG  
AGGAGGTCGAGGTCAAGGAGATAGCCAATGGCTTAGAACGAGCCGCCACCGTTCTTGTGGTCCCT  
ACGCAAACCTCCTCCAGAGGGGAAGCTCGAGATGCCAAGTCAGCATGAGACCTTCGTGGATGCGCTC  
CCTGAGGGGTTTCTGGAGAGGACGGCCATCGAGGGAAGATCATCGCATGGGCCCCCTCAAGTGGCCA  
TCCTCGCCCACCAGGCCGTGGGTGGCTTCGTGTGCGATTGTGGGTGGAACCTCGACATTGGAGAGCCT

GTGGTTCGGGGTTCCGATGGCTGTATGGCCACTGTACTCAGAGCAACAGTTGAATGCTTTCCTGCTGG  
TGAAGGAGCTGGGAATTGCAGTCGAGATTAGGATGGATTATCGAACGGATTGGAAGACGAAAAAAGC  
GAATTTTGTGTGACAGCGGATGAAATAGAGAATGGGGTGAAGAAGCTGATGAGTATGGATGAGGAG  
ATCAGAGGTAAAGTGAAGAAGATGAGTGAAAAAGGTAAAAAGGCTTTACAAGATGGAGGCTCCTCT  
CATCATTGGTTAGGGCGTTTTATTGCAGATGTCTTGGATAACGTTGCCTAG

MTKMELVFVPIPGIGHLPSTVQLAKLILQRDHRISVVVLMINVPHDDNAIVNAYIDSQTRDAHPTTRLTFIS  
LPAPASPPDASSPKFFANIIELHKPFVKEAVLDRIQSGLSKPVGFIVDMFCTTMIDVANELHVASYIFFTSGAI  
LLNFMFRIESLVDADRVNFADEFGADPDKEMDVPGFNRNRPVKVIPSPFLDKEVVSQWNLNPMRRFRESK  
GILVNTYAELESYATQALLEQAEDNKVPAVYPVGPILVLDRGSQKEEDDYSNSIIMEWLDQQPPSSVVFLC  
FGSMGSWEEVEVKEIANGLERAGHRFLWSLRKPPEGKLEMPSQHETFVDALPEGFLERTAHRGKIIAWA  
PQVAILAHQAVGGFVSHCGWNSTLESLWFGVPMVWPLYSEQQLNAFLLVKELGIAVEIRMDYRTDWKT  
KKANFVVTADEIENGVKKLMSMDEEIRGKVKKMSEKGKKALQDGGSSHHWLGRFIADVLDNVA

>HU06G00241.1-W

ATGACAAAAATGGAGTTGGTGTTCCTCCCAATCCCAGGGATTGGGCACTTGCCGTCCACCGTCCAGTT  
GGCCAAGCTCATCTCCAGCGCGACCACCGTATTTTCGGTGGTTGTCCTAATGATCAACGCCCTCATG  
ATGATAACGCCATAGTCAACGCTTACATTGATTCCCAGACACGTGATGCCCATCCTACCACCCGACTCA  
CCTTCATCTCCCTACCCGCGCCCGCCAGCCCGCCGACGCGTCCTCCCCTAAATTCTTCGCCAACATAA  
TAGAGCTCCATAAGCCCTTCGTAAAGGAGGCTGTCTCGACCGGATCCAATCCGGGTTGAGCAAGCC  
CGTCGGGTTTCATAGTCGACATGTTTTGCACCACCATGATTGACGTCGCCAATGAGCTCCACGTGGCCT  
CTTACATCTTCTTACCTCCGAGCCATACTTCTCAATTTTCATGTTCCGGATCGAATCATTGGTTGATGC  
GGACAGGGTCAACTTTGCGGATGAGTTCGGTGCGGACCCGGATAAAGAAATGGATGTTCCCGGGTTC  
AGGAACCGGGTACCGGGAAAGGTCATACCGTCGCCGTTTCTCGACAAGGAAGTTGTGTCCCAATGGA  
ATCTCAACCCCATGAGGAGGTTTAGAGAATCCAAGGGCATTCTTGTAATACGTACGCGGAGTTGGAA  
TCCTACGCCACCCAAGCGTTGCTAGAGCAGGCAGAGGACAATAAGGTCCCTGCCGTTTATCCCGTGG  
GCCCCATCTTGGTGCTCGACCGTGGGTCCCAGAAGGAGGAGGATGACTACTCCAATTCCATCATCATG  
GAGTGGCTGGACCAGCAGCCCCCTCCTCGGTGGTGTTCCTGTGCTTTGGGAGCATGGGAAGCTGGG  
AGGAGGTCGAGGTCAAGGAGATAGCCAATGGCTTAGAACGAGCCGGCCACCGGTTCTTGTGGTCCCT  
ACGCAAACCTCCTCCAGAGGGGAAGCTCGAGATGCCAAGTCAGCATGAGACCTTCGTGGATGCGCTC  
CCTGAGGGGTTTCTGGAGAGGACGGCCCATCGAGGGAAGATCATCGCATGGGCCCTCAAGTGGCCA  
TCCTCGCCCACCAGGCCGTGGGTGGCTTCGTGTGCGATTGTGGGTGGAACGACATTGGAGAGCCT  
GTGGTTCGGGGTTCCGATGGCTGCATGGCCACTGTACGCAGAGCAACAGTTGAATGCTTTCCTGCTGG  
TGAAGGAGCTGGGAATTGCAGTCGAGATTAGGATGGATTATCGAACGGATTGGAAGACGAAAAAAGC  
GAATTTTGTGTGACAGCGGATGAAATAGAGAATGGGGTGAAGAAGCTGATGAGTATGGATGAGGAG  
ATCAGAGGTAAAGTGAAGAAGATGAGTGAAAAAGGTAAAAAGGCTTTACAAGATGGAGGCTCCTCT  
CATCATTGGTTAGGGCGTTTTATTGCAGATGTCTTGGATAACGTTGCCTAG

MTKMELVFVPIPGIGHLPSTVQLAKLILQRDHRISVVVLMINAPHDDNAIVNAYIDSQTRDAHPTTRLTFIS

LPAPASPPDASSPKFFANIIELHKPFVKEAVLDRIQSGLSKPVGFIVDMFCTTMIDVANELHVASYIFFTSGAI  
LLNFMFRIESLVDADRVNFADEFGADPDKEMDVPGFRNRVPGKVIPSPFLDKEVVSQWNLNPMRRFRESK  
GILVNTYAELESYATQALLEQAEDNKVPAVYPVGPILVLDRGSQKEEDYSNSIIMEWLDQQPPSSVVFLC  
FGSMGSWEEVEVKEIANGLERAGHRFLWSLRKPPPEGKLEMP SQHETFVDALPEGFLERTAHRGKIIAWA  
PQVAILAHQAVGGFVSHCGWNSTLESLWFGVPMAAWPLYAEQQLNAFLLVKELGIAVEIRMDYRTDWKT  
KKANFVVTADEIENGVKKLMSMDEEIRGKVKKMSEKGKKALQDGGSSHHWLGRFIADVLDNVA

>>HU06G00243.1-R

ATGGGGAAAACAGAGCTAGTGTGTTGTCCCAACCCAGGGATGGGGCATTGCTGTCAACAGTGGAGG  
TGGCCAAGCTCATCCTCCAGCGCGACCACC**GCAATTCAGTCGTCATCCTAATCCTCAACTTCCCCGTC**  
**GACAACTCAGTAGTCAACGCTTACATTGACTCCAGTCACGACAGGCCGACCCCACTCGCCTCACCT**  
**TCATCGCCCTGCCCCGGCTCGCCAACCCGATCGACCCGTCCTCTAAGAACTTCTTCGCCGACTTCATC**  
**GAGGACCACAAGCCCCCTT**GTCAAGCAGGCCGTCCTTGATCGGATCGAGTCCGGGTCACCCAAACCTG  
CCGGGTTGATCCTCGACATGTTCTGCATCACCATGGTCGACGTCGCCAATGAACTCCACGTCGACTCT  
TACATGTTCTTCACCTCCGAGCCTCAATGCTCAATCTCACGTACCGTGTCCAATCATTGGCCGATGAG  
GAGGGAGAGAATGTTGTTGTGGATAGGTTAAGCGACCCGGAAAAAGAAATGGATGTTCCCGGGTTAA  
GGAACCGGATACCCGGAAAATTCATACCCTCGGCGTTTCTCGATAGGGAAGGGGGGTTTCGAGATGATT  
CTCAATCTTGCTAGGAAGTTTCGAGAGTCAAAGGGCATTCTTATAAATACCTACATGGAGTTGGAATCC  
TATCCTCTCCAAGCGTTGCTAGATCAGGCAAAGGATAACAAAATCCCAGCCGTCTATCCCGTGGGGCC  
CATCTTGAGCTCGACAGCAAAAGCCGCGGTGGATCCCAAAGGAGGAACACGACTCCATCATGGAT  
TGGCTCGACCAGCAGCCTCCATCGTCGGTGGTGTTCCTCTGCTTCGGGAGCATGGGAAGCTTCGATGA  
GGTCCAGGTCAAGGAGACAGCCAACGGCCTCGACCGAGCTGGCCACCGGTTCCCTGTGGTCCCTACGC  
AGACCACCTCCGCAGGGGAGGTTTCGGGATGCCAAGTCCTCACGAGACCTTCGTGGACGCTCTCCCTG  
AGGGGTTCCTAGAGAGGACAGCCCACCGAGGGAAGATCATAGGGTGGGCCCCGCAAGTGGACGTCC  
TGGCCCATCAGGCCATTGGAGGGTTCGTGTCTCATTGTGGGTGGAACCTCGACTCTAGAGAGCCTGTGG  
TTCGGGGTGCCAATGGCCACGTGGCCTTTATACGCAGAACAGCAACTGAATGCATTCACTCTGGTGGGA  
GGAGTTGGGGTTGGCAGTGGAGATTCGGATGGATTATCGGAGGGATTGGAGGACAAAACAGGCGAAT  
TTTGTAGTGACGGCGGAGGAGATAGAGAATGGGGTGAAGAAGCTGATGAGTATGGATGAGGAGAAG  
AGGGAGAAAGTTAGGGAGATGAGTGAAAATGGTAGGAAGGCTCTTCAAAATGGTGGCTCTTCTCACC  
ATTGGCTGGGTCGCTTCGTTGCAAGTGTCTCTGATAACGTTGTTTAG

MGKTELVFVPTPGMGHLLSTVEVAKLILQRDHRSVVILILNFPVDNSVVNAYIDSQSRQADPTRLTFIALP  
RLANPIDPSSKNFFADFIEDHKPLVKQAVLDRIESGSPKAGLILDMFCITMVDVANELHVDSYMFFTSGAS  
MLNLTYRVQSLADEEGENVVVDRLSDPEKEMDVPGLRNRIPGKFIPSAFLDREGGFEMILNLARKFRESK  
GILINTYMELESYPLQALLDQAKDNKIPAVYPVGPILELDSKSRGGSQKEEHDSIMDWLDQQPPSSVVFLC  
FGSMGSFDEVQVKETANGLDRAGHRFLWSLRPPPQGRFGMPSPHETFVDALPEGFLERTAHRGKIIIGWA  
PQVDVLAHQAIIGFVSHCGWNSTLESLWFGVPMATWPLYAEQQLNAFTLVEELGLAVEIRMDYRRDWR  
TKQANFVVTAEEIENGVKKLMSMDEEKREKVREMSENGRKALQNGGSSHHWLGRFVASVSDNVV



>HU06G00243.1-W

ATGGGGAAAACAGAGCTAGTGTGTTGTCCCAACCCAGGGATGGGGCATTGCTGTCAACAGTGGAGG  
TGGCCAAGCTCATCCTCCAGCGCGACCACC**GCAATTCAGTCGTCATCCTAATCCTCAACTTCCCCGTC**  
**GACAACTCAGTAGTCAACGCTTACATTGACTCCAGTCACGACAGGCCGACCCCACTCGCCTCACCT**  
**TCATCGCCCTGCCCCGGCTCGCCAACCCGATCGACCCGTCCTCCAAGAACTTCTTCGCCAACTTCATC**  
**GAGGACCACAAGCCCCCTT**GTCAAGCAGGCCGTCCTTGATCGGATCGAGTCCGGGTCACCCAAACCTG  
CCGGGTTGATCCTCGACATGTTCTGCATCACCATGGTCGACGTCGCCAATGAACTCCACGTCGACTCT  
TACATGTTCTTCACCTCCGGAGCCTCAATGCTCAATCTCATGTACCGTGTCCAATCATTGACGGATGAG  
GAGGGAGAGAATGTTGTTGTGGATAGGTTAAGCGACCCGGATAAAGAAATGGATGTTCCAGGGTTCA  
GGAACCAGGTACCCGGAATAATCATACCCGCGGTGTTTGTGATAGGGAAGGGGGGTCCGAGATGAT  
TCTCAATGTTGCTAGGAAGTCTCGAGAGTCTAAGGGCATTCTTATAAATACCTACATGGAGTTGGAATC  
CTATCCTCTCCAAGCGTTGCTAGATCAGGCAAAGGATAACAAAATCCCAGCCGTCCTATCCCGTGGGGC  
CCATCTTGAGCTCGACAGCAAAAGCCGCGGTGGATCCCAAAGGAGGAACACGACTCCATCATGGA  
TTGGCTCGACCAGCAGCCTCCATCGTCGGTGGCGTTCTCTGCTTCGGGAGCATGGGAAGCTTCGATG  
AGGTCCAGGTCAAGGAGACAGCCAACGGCCTCGACCGAGCTGGCCACCGGTTCTGTGGTCCCTAC  
GCAGACCACCTCCGCAGGGGAGGTTCTGGGATGCCAAGTCCTCACGAGACCTTCGTGGACGCTCTCCC  
TGAGGGGTTCTAGAGAGGACAGCCACCGAGGGAAGATCATAGGGTGGGCCCCGCAAGTGGACGT  
CCTGGCCCATCAGGCCATTGGAGGGTTCGTGTCTCATTGTGGGTGGAATCGACTCTAGAGAGCCTGT  
GGTTCGGGGTGCCAATGGCCACGTGGCCTTTATACGCAGAACAGCAACTGAATGCATTCACTCTGGTG  
GAGGAGTTGGGGTTGGCAGTGGAGATTCGGATGGATTATCGGAGGGATTGGAGGACAAAACAGGCG  
AATTTTGTAGTGACGGCGGAGGAGATAGAGAATGGGGTGAAGAAGCTGATGAGTATGGATGAGGAGA  
AGAGGGAGAAAGTTAGGGAGATGAGTGAAAATGGTAGGAAGGCTCTTCAAAACGGTGGCTCTTCTC  
ACAATTGGCTGGGTCGCTTCGTTAGTGTCTTAGATAACGTTGTTAG

MGKTELVFVPTPGMGHLLSTVEVAKLILQRDHRSVVILILNFPVDNSVFNAYIDSQSRQADPTRLTFIALP  
RLANPIDPSSKNFFANFIEDHKPLVKQAVLDRIESGSPKPAGLILDMFCITMVDVANELHVDSYMFFTSGAS  
MLNLMYRVQSLTDEEGENVVVDRLSDPKEMDVPGRNQVPGKFIPAVFVDREGGSEMILNVARKSRES  
KGILINTYMELESYPLQALLDQAKDNKIPAVYPVGPILDSKSRGGSQKEEHSIMDWLDQQPPSSVAF  
CFGSMGSFDEVQVKETANGLDRAGHRFLWSLRRPPPQGRFGMPSPHETFVDALPEGFLERTAHRGKIIGW  
APQVDVLAHQAIIGGFVSHCGWNSTLESWFVGPMTWPLYAEQQLNAFTLVEELGLAVEIRMDYRRDW  
RTKQANFVVTAEEIENGVKKLMSMDEEKREKVREMSSENGRKALQNGGSSHNWLGRFVSVLDNVV

>HU07G00076.1-R

ATGGAAGAATCACAACTCACATACTGATCGTCCCAACGCCGGGTATGGGCCACCTTATTCCCCTGGT  
CGAGCTCGCAAAGCGGCTCATAAACCAACGAACCCATAGGTTACCTTCTCCTTCATCATCCCACCC  
AAGGGCCCGCCACCGAGGCCCAACGGGCGCGGTCTGGGTCTCTCCCATCGGGCCGGGCGAGTGCT  
CGTTCCTTCTCCTCCGGTCAGCATGGACGACCTGCCCCCGACGCCAAGATAGAGACCAGGATCGCCCT  
CACCTTGCCCCGGTCCCTCCCGGCTCTCCGGGCGCGATTCTGGGCAGTGGCTCGAGCCCGGATCCTC

GTCGTCGACCTCTTTGGAAGTATGCGTTTGAGCTCTGCCCCGAGTTTCGGGCTCCG**GCCCTACATCTT**  
**CTACCTACAACGGCTATGTGTCTCTCCTTCTTTTTTACCTCCACAGTTAGACTCTCAAGTATCATGT**  
**GAGTTTAGGGAGTTGGGTGA**ACCGGTGGAAGTTCCCGGGTGTGTCCCGGTTTCATGGAAAGGACCTCC  
TGGACCCGGTTCAGGAGAGAGCAAATGATGCCTATAAATGGGTGCTTCATCACGCTAAGAGGTATAGG  
TTGGCTGAGGGTATTTTGGTAAATAGCTTTATGGAGTTAGAGAAGGAGGCTATAGAGGCTTTAAAGAA  
GCCTGAACCGGGAAAACCACCGGTTTACCCGGTTGGACCGCTGGTTCAGACCGGGTTGAGTGAGGG  
TGTGGAGCGGTGTGAGTCTTTGGAGTGGTTGGATGAACAGCCTAGTGGGTCAGTCTTATATGTGTCTT  
TTGGGAGTGGTGGGACCCTCTCCCATGATCAGTTGATTGAACTAGCTCATGGTTTGGAGATGAGTGGG  
CTAAGATTTTTGTGGGTGTGAGGAGCCCAAATGACGAAGCTGCCGATGCCACCTACTTCAACACCA  
GCCAGGGTGGGATGGACCCCTAGACTACCTACCTAAAGGGTTCCTAGAAAGGACCAAGAAGAGGG  
GCCTAGTCGTCCCCACGTGGGCCCCACAGATCAAGGTCCTTAGCCACGAGTCCACCGGTGGGTTTTTA  
ACCCACTGTGGTTGGAAGTCTGATTTTGGAGGCTGTAGTTCATGGGGTACCCTTAATTGCCTGGCCGCT  
CTACGCCGAGCAGAAAATGAACGCAGTAATGCTGACCGAGGGTCTAAAGGTTGCAATCAAGCCGGGT  
GCCAATGAGACCGGCCTGGTTGGCCGAGGCGATATTGCAACTGTGGTAAGAGGCCTAATGGAAGGAG  
AAGAAGGGAAAGAAATTCGAACCAGGATGAAGGGTTTGAAAGATGCAGCCTCTAGGGTGCTCAGCG  
AAGAGGGCTCCTCCACCAAGGCACTCTGTGAAGTGGCTCACGGGTGGAGATCTCACTAA

MEESQTHILIVPTPGMGLIPLVELAKRLINQRTHRFTFSFIIPTQGPATEAQRAAVGSLPSGRAECSFLPPVS  
MDDLPPDAKIETRIALTARSLPALRAAIRAVARARILVVDLFGTDAFELCPEFGLRPYIFYPTTAMCLSFFF  
HLPQLDSQVSCEFRELGEPLVPGVPHGKDLLDPVQERANDAYKWVLHHAKRYRLAEGILVNSFMEL  
EKEAIEALKKPEPGKPPVYPVGPLVQTGLSEGVERCESLEWLDEQPSGSVLYVSFGSGGTLSDQLIELAH  
GLEMSGRLFLWVVRSPNDEAADATYFNSTSQGMDPLDYLPGKFLERTKKRGLVVPWAPQIKVLSHEST  
GGFLTHCGWNSILEAVVHGVPLIAWPLYAEQKMNAVMLTEGLKVAIKPGANETGLVGRGDIATVVRGLM  
EGEEGKEIRTRMKGLKDAASRVLSEEGSSTKALCEVAHGWRSH

>HU07G00076.1-W

ATGGAAGAATCACAACTCACATACTGATCGTCCCAACGCCGGGTATGGGCCACCTTATTCCCCTGGT  
CGAGCTCGCAAAGCGGCTCATAAACCAACGAACCCATAGGTTACCTTCTCCTTCATCATCCCGACCC  
AAGGGCCCGCCACCGAGGCCCAACGGGCGCGGTTCGGGTCTCTCCCATCGGGCCGGGCCGAGTGCT  
CGTTCCTTCCTCCGGTCAGCATGGACGACCTGCCCCCGACGCCAAGATAGAGACCAGGATCGCCCT  
CACCTGGCCCGGTCCCTCCCGGCTCTCCGGGCCGCGATTTCGGGCAGTGGCTCGAGCCCGGATCCTC  
GTCGTCGACCTCTTTGGAAGTATGCGTTTGAGCTCTGCCCCGAGTTTCGGGCTCCG**GCCCTACATCTT**  
**CTACCTACAACGGCTATGTGTCTCTCCTTCTTTTTTACCTCCACAGTTAGACTCTCAAGTATCATGT**  
**GAGTTTAGGGAGTTGGGTGA**ACCGGTGGAAGTTCCCGGGTGTGTCCCGGTTTCATGGAAAGGACCTCC  
TGGACCCGGTTCAGGAGAGAGCAAATGATGCCTATAAATGGGTGCTTCATCACGCTAAGAGGTATAGG  
TTGGCTGAGGGTATTTTGGTAAATAGCTTTATGGAGTTAGAGAAGGAGGCTATAGAGGCTTTAAAGAA  
GCCTGAACCGGGAAAACCACCGGTTTACCCGGTTGGACCGCTGGTTCAGACCGGGTTGAGTGAGGG  
TGTGGAGCGGTGTGAGTCTTTGGAGTGGTTGGATGAACAGCCTAGTGGGTCAGTCTTATATGTGTCTT  
TTGGGAGTGGTGGGACCCTCTCCCATGATCAGTTGATTGAACTAGCTCATGGTTTGGAGATGAGTGGG

CTAAGATTTTTGTGGGTTGTGAGGAGCCCAAATGACAAAGCTGCCGATGCCACCTACTTCAACACCA  
GCCAGGGTGGGATGGACCCCTAGACTACCTACCTAAAGGGTTCCTAGAAAGGACCAAGAAGAGGG  
GCCTAGTCGTCCCCACGTGGGCCCCACAGATCAAGGTCCTTAGCCACGAGTCCACCGGTGGGTTTTTA  
ACCCACTGTGGTTGGAACCTGATTTTGGAGGCTGTGGTTCATGGGGTACCCTTAATTGCCTGGCCGT  
CTACGCCGAGCAGAAAATGAACGCAGTAATGCTGACCGAGGGTCTGAAGGTTGCAATCAAGCCGGGT  
GCCAATGAGACCGGCCTGGTTGGCCGAGGCGATATTGCAACTGTGGTAAGAGGCCTAATGGAAGGAG  
AAGAAGGGAAAGAAATTCGAACCAGGATGAAGGGTTTGAAAGATGCAGCCTCTAGGGTGCTCAGCG  
AAGAGGGCTCCTCCACCAAGGCACTCTGTGAAGTGGCTCATGGGTGGAGATCTCACTAA

MEESQTHILIVPTPGMGLIPLVELAKRLINQRTHRFTFSFIPTQGPATEAQRAAVGSLPSGRAECSFLPPVS  
MDDLPPDAKIE TRIALTLARSLPALRAAIRAVARARILVVDLFGTDAFELCPEFGLRPYIFYPTTAMCLSFFF  
HLPQLDSQVSCEFRELGEPELPGCVPVHKGDLLDPVQERANDAYKWVLHHAKRYRLAEGILVNSFMEL  
EKEAIEALKKPEPGKPPVYPVGPLVQTGLSEGVVERCESLEWLDEQPSGSVLYVSFGSGGTLSDQLIELAH  
GLEMSGRLFLWVVRSPNDKAADATYFNTSQGGMDPLDYLPGKFLERTKKRGLVVPTWAPQIKVLSHEST  
GGFLTHCGWNSILEAVVHGVPLIAWPLYAEQKMNAVMLTEGLKVAIKPGANETGLVGRGDIATVVRGLM  
EGEEGKEIRTRMKGLKDAASRVLSEEGSSTKALCEVAHGWRSH

>HU11G01695.1-R

ATGGCAAAGCAGGAATGTCGTCCTCACATAGTGATCGTCCCCACACCAGGAATGGGGCACCTCATCCC  
ACTAGTCCAGTTGGCCAACCGCATCCTTGACTCCTTCCCCTCTTTACCCTCTCCTTCTGTTCCCCAC  
CATGGACCCACCATCCAAGGCCAGGTTGCCACGCTGGCAGCCCTCCCCTTGAACCGGGCCTCCTCC  
TCCTTCTCCCTCCGGTCAGCACTCATGACCTCCCTCCCGACACCAAGATCGAGACCCGGATCTGTCT  
GACCCTGGTCCGGTCCCTCCCGACTCTCCGCTCCCGCCTTGTGGACCTTGCCCGGGACCCCAACCGTC  
GCCTCTCCGCCCTCGTCGTTGATCTCTTCGGGACCGACGCCTTCGATCTCTGCGCCGAGTTCGGCATG  
AAGCCCTACATCTTCTTTCCCTCCACCGCCATGTGCC**TCTCACTCTTCTCCACCTCCCCGAGTTGGAT**  
**GCCAAGGTTTCATGCGAGTTTAAGGACGTGGGTGAACCGGTCAGACTTCCCGGTTGTGTTCCCGTCC**  
**GAGGAGAAGACCTCCTCGACCCGTTTCAGGACCGGAAGAACGAGACCTACAAATGGATACTTCATCA**  
**TGCTAAGAGGTATCGGTTGGCTGA**AGGGTATTTTGGTAAATACATTTTTTGAGTTGGAGGAGGGTGCTG  
TTAAAGCCCTGCAGCGGTCTGAACCGGGAAAGCCCCAGTTCACCCGGTCGGGCCGCTGGTTTCGGCC  
GGGATCGGGTAAAGGAAAGGATGATGGGTTCGGAGTGTCTGAGGTGGCTGGATGAGCAGCCACGTGG  
GTCCGTGTTATTTGTCTCGTTTGGGAGTGGTGGGACCCTCACCTGTGATCAGTTAGCTGAGTTGGCCC  
ATGGTTTGAAATGAGTGAGCAGAGGTTTTTGTGGGTGGTGAGGGCCCCAAATGACACTACCAATGC  
CACCTTCTTTAACAGTGGCGAAGCTGATAGGGACCCATTAGGCTTTTTACCTCAAGGGTTCCTAGAAA  
GGACTAAAGAAAGGGGCCTAGTCATCCCTCGTGGGCCCCACAAATAAAGGTCCTTAGCCACGAGTC  
CACTGGTGGGTTCTGACACATTGTGGGTGGAACCTCATTTTGGAGAGCGTGATCATGGGGTACCGT  
TCATTGCCTGGCCGCTCTACGCTGAGCAGCGGATGAACGCAGTAATGCTAACTGAGGATCTCAAGGTC  
GCGTTACAGCCTAAGGCCGGACCCAATGGGCTCATCAGCCGAGGGGAGATCGCGGTTACAGTAAGAG  
GTCTAATGGAGGGTGAAGAAGGGAAAAGAATTCGGAACAGGATGAAAGACTTGAAAGATGCAGCTG  
CTAGAGCACTTAGTGACAATGGATCCTCCACAAAGGCACTGTCCGAAGCGGCCCTTACGTGGAAATC

TCAATAA

MAKQECRPHIVIVPTPGMGHLIPLVQLANRILDSFPSFTLSFLVPTMDPPSKAQVATLAALPLNRASSSFLPP  
VSTHDLPPDTKIEIRICLTLVRSPLTLRSRLVDLARDPTRRLSALVVDLFGTDAFDLCAEFGMKPYIFFPSTA  
MCLSLFLHLPELDAKVSCEFkdVGEpVRLPGCVpVRGEDLLDPVQDRKNETYKWILHHAKRYRLAEGIL  
VNTFFELEEGAVKALQRSEPGKPPVHPVGPLVRPGSGKGKDDGSECLRWLDEQPRGSVLFVSFGSGGTLT  
CDQLAELAHGLEMSEQRFLWVVRAPNDTTNATFFNSGEADRDPLGFLPQGFLERTKERGLVIPSWAPQIK  
VLSHESTGGFLTHCGWNSILESVDHGVPFIAWPLYAEQRMNAVMLTEDLKVALQPKAGPNGLISRGEIAVT  
VRGLMEGEEGKRIRNRMKDLKDAAARALSDNGSSTKALSEAALTWKSQ

>HU11G01695.1-W

ATGGCAAACCAGGAATGTCGTCATCACATAGTGATCATCCCCACACCAGGAATGGGGCACCTCATCCC  
ACTAGTCCAGTTGGCCAACCGCATCCTTGACTCCTTCCCCCTCTTTCACCCTCTCCTTCCTGGTCCCCAC  
CATGGACCCACCATCCAAGGCCAGGTTGCCACGCTGGCAGCCCTCCCCTTGACCGGGCCTCCTCC  
TCCTTCCTCCCTCCGGTCAGCACTCATGACCTCCCTCCCGACACCAAGATCGAGACCCGGATCTGTCT  
GACCCTGGTCCGGTCCCTCCCGACTCTCCGCTCCCGCCTTGTGGACCTTGCCCGGGACCCTACCCGTC  
GCCTCTCCGCCCTCGTAGTTGATCTCTTCGGGACCGACGCCTTCGATCTCTGCGCCGAGTTCGGCATG  
AAGCCCTACATCTTCTTTCCCTCCACCGCCATGTGCC**TCTCACTCTTCTCCACCTCCCCGAGTTGGAT**  
**GCCAAGGTTTCATGCGAGTTTAAGGACGTGGGTGAACCGGTCAGACTTCCCGGTTGTGTTCCCGTCC**  
**GAGGAGAAGACCTCCTCGACCCGTTTCAGGACCGGAAGAACGAGGCCTACAAATGGATACTTCATCA**  
**TGCTAAGAGGTATCGGTTGGCTGA**AGGGTATTTTGGTAAATACATTTTTTGAGTTGGAGGAGGGTGCTG  
TTAAAGCCCTGCAGCGGTCTGAACCGGGAAAGCCCCCAGTTCACCCGGTCGGGCCGCTGGTTCGGCC  
GGGATCGGGTAAAGGAAAGGATGATGGGTTCGGAGTGTCTGAGGTGGCTGGATGAGCAGCCACGTGG  
GTCCGTGTTATTTGTCTCGTTTGGGAGTGGTGGGACCCTCACCTGTGATCAGTTAGCTGAGTTGGCCC  
ATGGTTTGGAAATGAGTGAGCAGAGGTTTTTGTGGGTGGTGAGGGCCCCAAATGACACTACCAATGC  
CACCTTCTTTAACAGTGGCGAAGCTGATAGGGACCCATTAGGCTTTTTACCTCAAGGGTTCCTAGAAA  
GGACTAAAGAAAGGGGCCTAGTCATCCCCCTCGTGGGGCCCCACAAATAAAGGTCCCTAGCCACGAGTC  
CACTGGTGGGTTCCTGACACATTGTGGGTGGAACCTCATTTTGGAGAGCGTGGATCATGGGGTACCGT  
TCATTGCCTGGCCGCTCTACGCTGAGCAGCGGATGAACGCAGTAATGCTAACTGAGGATCTCAAGGTC  
GCGTTACAGCCTAAGGCCGGACCCAATGGGCTCATCAGCCGAGGGGAGATCGCGGTTACAGTAAGAG  
GTCTAATGGAGGGTGAAGAAGGGAAAAGAATTCGGAACAGGATGAAAGACTTGAAAGATGCAGCTG  
CTAGAGCACTTAGTGACAATGGATCCTCCACAAAGGCACTGTCCGAAGCGGCCCTTACGTGGAAATC  
TCAATAA

MANQECRHHIVIPTPGMGHLIPLVQLANRILDSFPSFTLSFLVPTMDPPSKAQVATLAALPLDRASSSFLPP  
VSTHDLPPDTKIEIRICLTLVRSPLTLRSRLVDLARDPTRRLSALVVDLFGTDAFDLCAEFGMKPYIFFPSTA  
MCLSLFLHLPELDAKVSCEFkdVGEpVRLPGCVpVRGEDLLDPVQDRKNEAYKWILHHAKRYRLAEGIL  
VNTFFELEEGAVKALQRSEPGKPPVHPVGPLVRPGSGKGKDDGSECLRWLDEQPRGSVLFVSFGSGGTLT  
CDQLAELAHGLEMSEQRFLWVVRAPNDTTNATFFNSGEADRDPLGFLPQGFLERTKERGLVIPSWAPQIK

VLSHESTGGFLTHCGWNSILESVDHGVPIAWPLYAEQRMNAVMLTEDLKVALQPKAGPNGLISRGEIAVT  
VRGLMEGEEGKRIRNRMKDLKDAAARALSDNGSSTKALSEAALTWKSQ

>HU11G01696.1-R

ATGTACTTCACCACCAACGCCATGTGCCTGCTCTTCTTGCTCAACGTTCCACGGTTGGATGAAACGGT  
ATCATGTGAGTACCCGGATATGCCCCACCCGCTTGTTTTACCCGGGTGCGTGCCACTCTA..CGGTAAG..  
GACTTTGTGGACCCTTGCATGGACCGCAAGGACGAGTCCTACAGAGTGCTGCTCTATCACGTCAAGA  
GGTATGCCCTGACTGAGGGTATTTTTGTCAATACATTTTTTCGATCTGGAGCCCCGGTGCTATCCGGGCTT  
TGCAAAGTGAGGATCCGAATTGGCCCCCGGTCTACCCAGTTGGCCCGATTATTCAATCGGCTCAAAGT  
GCGGAAACCGATGGAAGTGAATGTTTGAGTTGGTTAGACCGACAGCCAACC**GGGTCGGTTCTATTTGT**  
**GTCGTTTGGGAGCGGAGGGACTTTGTCAAAAGGGCAACTAAATGAATTGGCAATCGGGCTCGAGAAA**  
**AGTGGCCAGAGATTTGTGTGGGTAGTCCGAAGCCCAAACGAACACTC**GTCAATTTGGGTCATTTTTCAG  
TGCCCAGAATCAAGATGATCCGTTTGGGTTCTACAGATGGATATCTCCATCGGATTAAAGACCGTGG  
GCTGTTGGTTCCATCTTGGGCCCCACAGATAAGGGTTCTGAGCCATGGCTCCACAGGAGGGTTCTTGA  
CTCACTGTGGGTGGAAGTCCGGTCTTAGAAAGTATAATGAATGGAGTGCCCTTGATTGTGTGGCCGTTG  
TATGCAGAACAAAGGATGAATGCAGTAATGTTTAACCAAGGGCTTAAGGTCGCATTAAGGCCTAGTGC  
TAATGAGCGTGGGCTTGTTGAGGCGGATGAGATTGCTAGAGTCGTCAAGGAGCTGATGGAGGGCAAT  
GAAGGGAAAACAGCTCGCCATGGAATGAAGGCGTTAAGCGATTTGGCTAAGAAGACGATAAGTGAA  
GATGGAGATTCATCAAAATTGCTAGCTGAGGTCACCTCAGAAATGGAGTCACGGCAAAATTCTCCAGA  
AAGATTACCCAGTTGATCTTCCATGA

MYFTTNAMCLLFLNVPRLDETVSCEYPDMPDPLVLPGCVPLYGKDFVDPCMDRKDESYRVLLYHVKRY  
ALTEGIFVNTFFDLEPGAIRALQSEDPNWPPVYPVGPIIQAQSAETDGTCLSWLDRQPTGSVLFVSFGSG  
GTLSKGQLNELAIGLEKSGQRFWVVRSPNEHSSFGSFFSAQNQDDPFGFLPDGYLHRIKDRGLLVPSWA  
PQIRVLSHGSTGGFLTHCGWNSVLESIMNGVPLIVWPLYAEQRMNAV MFNQGLKVALRPSANERGLVEA  
DEIARVVKELMEGNEGKTARHGMKALS DLA KKTISEDGDSSKLLAEVTQKWSHGKILQKDYPVDLP

>HU11G01696.1-W

ATGTACTTCACCACCAACGCCATGTGCCTGCTCTTCTTGCTCAACGTTCCACGGTTGGATGAAACGGT  
ATCATGTGAGTACCCGGATATGCCCCACCCGCTTGTTTTACCCGGGTGCGTGCCACTCTA..CGGTAAG..  
GACTTTGTGGACCCTTGCATGGACCGCAAGGACGAGTCCTACAGAGTGCTGCTCTATCACGTCAAGA  
GGTATGCCCTGACTGAGGGTATTTTTGTCAATACATTTTTTCGATCTGGAGCCCCGGTGCTATCCGGGCTT  
TGCAAAGTGAGGATCCGAATTGGCCCCCGGTCTACCCAGTTGGCCCGATTATTCAATCGGCTCAAAGT  
GCGGAAACCGATGGAAGTGAATGTTTGAGTTGGTTAGACCGACAGCCAACC**GGGTCGGTTCTATTTGT**  
**GTCGTTTGGGAGCGGAGGGACTTTGTCAAAAGGGCAACTAAATGAATTGGCAATCGGGCTCGAGAAA**  
**AGTGGCCAGAGATTTGTGTGGGTAGTCCGAAGCCCAAACGAACACTC**GTCAATTTGGGTCATTTTTCAG  
TGCCCAGAATCAAGATGATCCGTTTGGGTTCTACAGATGGATATCTCCATCGGATTACAGACCGTGG  
GCTGTTGGTTCCATCTTGGGCCCCACAGATAAGGGCTCTGAGCCATGGCTCCACAGGAGGGTTCTTGA  
CTCACTGTGGGTGGAAGTCCGGTCTTAGAAAGTATAATGAATGGAGTGCCCTTGATTGTGTGGCCGTTG

TATGCAGAACAAAGGATGAATGCAGTAATGTTTAACCAAGGGCTTAAGGTCGCATTAAGGCCTAGTGC  
TAATGAGCGTGGGCTTGTTGAGGCGGATGAGATTGCTAGAGTCGTCAAGGAGCTGATGGAGGGCAAT  
GAAGGGAAAACAGCTCGCCATGGAATGAAGGCGTTAAGCGATTTGGCTAAGAAGACGATAAGTGAA  
GATGGAGATTCATCAAAATTGCTAGCTGAGGTCACCTCAGAAATGGAGTCACAGCAAAATTCTCCAGA  
AAGATTACCCAGTTGATCTTCCATGA

MYFTTNAMCLLFLNVPRLDETVSCEYPDMPDPLVLPGCVPLYGKDFVDPCMDRKDESYRVLLYHVKRY  
ALTEGIFVNTFFDLEPGAIRALQSEDPNWPPVYPVGPIIQAQSAETDGTECLSWLDRQPTGSVLFVSFGSG  
GTLSKGQLNELAIGLEKSGQRQFVWVVRSPNEHSSFGSFFSAQNQDDPFGFLPDGYLHRITDRGLLVPSWA  
PQIRALSHGSTGGFLTHCGWNSVLESIMNGVPLIVWPLYAEQRMNAV MFNQGLKVALRPSANERGLVEA  
DEIARVVKELMEGNEGKTARHGMKALSDLAKKTISEDGDSSKLLAEVTQKWSH SKILQKDYPVDLP

>HU11G01697.1-R

ATGCATGTACGTGCCAATTTAGCCATGGAAGCTCTGGTTCACCAAATAGCCATAATCCCAAGCCCTGG  
AATGGGCCATTTAATCCCCTTCGTCGAGTTCGCCAAGCTCCTCGTCTCCCGCTTCAACCTCTCAGTCTC  
TCTCCTCATCCCCACTTTGGGGCAGCCCACCCGGGCCCCAAGTCTCCTTCCTCGACTCCCTCCCTTCAG  
CCATTTCCCACACCTTCCTTCCTCCTATTGACCCGGTCCAAGTGCCTTCAAGGCGCAGGCCATGAGGTC  
ACCATCTCCCTTGTCCTGACCCATTCTCTCTCCTCCATCCGGACCTCCCTGGTCCGCATGGCCCACCTC  
GTTGTTGCCCTTGTCACCGACCTGTTCCGTACCGACATCTTCGATGTTGCGAGGGAGCTGGGGATTCC  
TCCCTACATGTATTTTACATGCTCAGCTATGAAGTGTATGTTCTCCTTCCATCTCCCTAGGTTGGATGA  
ACGGTGTCGTGTGACTACAAGGATATGCCCGGGCCGCTTCTCCTGCCCGGGTGCGTGCCCATTCACGG  
CCAAGATTTTGACGACCCGTGTCAAGGACCGTAAGGGTGAGTGTTACAGGGTGTTGCTTCATCATTCAA  
AGAGGTACGTATTGGCTGAGGGTATTTTGTCAATACGTTTTTTGATCTCGAGCCGGGTGCTCTCCGGA  
CTTTGCAAAGTGAAGATCCGAATAGGCCTCCGGCTTACCCGATTGGCCCCATACTTCAGTCGGGTCAA  
GCGGGGGACATCGATGGGTCCGAGTGCTTGAGTTGGTTGGAGCGGCAACCAACCGGGTCGGTCCTAT  
ATGTGTCGTTTGGGAGTGGGGGGACTTTATCCAGAGAGCAGATCATTGAATTGGCAATTGGGCTTGAG  
GGAAGTGAGCAGAGGTTTTTGTGGGTGGTTAGAGGCGCAAGTGATCAACTCTCTCATGGGTCATTTTT  
CGGTGCCCAAAGTCTAGATGACCCATTGTTGGTCTTACCAAATGGATATCTCAATCGGATCAAAGATCG  
CGGGCTATTAGTCCCTTCATGGGGCCCCCAGATAAAGGTCCTTAGCCACAAGTCCACAGGCGGGTTCT  
TAACACATTGTGGATGGAAGTCTGATTCTGGAGAGCATAATTAACGGGGTACCCTTGATTGCATGGCCAT  
TGTATGCGGAACAAAGGATGAATGCAGTAATGCTTACCCAAGGGCTTAAGGTCGCATTAAGGCCTATT  
GCTAATGCGAATGGCCTTTTTAGGGCAGATGAGATTGCTAGAGTCATCAAAGTTTTAATGAAAGGCGA  
AGAAGGGGAAATAATTCGCCATCGGATGAAAGAGCTAAGTGACTTGGCTAAGAAAGCTATGCGTGAA  
GATGGAGATTCTCAAAGTCACTTGCCCAGGTCGCTCACAAGTGGAATCAAAACAACTTCTCCAGA  
AAGATTAA

MHVRANLAMEALVHQIAIIPSPGMGHLIPFVEFAKLLVSRFNLSVSLLIPTLGQPTRAQVSFLDSLPSAISHT  
FLPPIDPVQLPQGAGHEVTISLVLTSLSSIRTSVLRMAHLVVALVTDLFGTDIFDVARELGIPPYMYFTCSA  
MNL MFSFHLPRLDETVSCDYKDMPGPLLLPGCVPIHGQDFDDPCQDRKGECYRVLLHHSKRYVLAEGIF

VNTFFDLEPGALRTLQTENPNRPPAYPIGPILQSGQAGDIDGSECLSWLERQPTGSVLYVSFGSGGTL SREQ  
IIELAIGLEGSEQRFLWVVRGASDQLSHGSFFGAQSLDDPFGFLPNGYLNRIKDRGLLVPSWAPQIKVLSHK  
STGGFLTHCGWNSILESIINGVPLIAWPLYAEQRMNAVMLTQGLKVALRPIANANGLFRADEIARVIKVL M  
KGEEGEIIRHRMKELSDLAKKAMREDGDSSKSLAQVAHKWNQNKLLQKD

>HU11G01697.1-W

ATGCATGTACGTGCCAATTTAGCCATGGAAGCTCTGGTTCACCAAATAGCCATAATCCCAAGCCCTGG  
AATGGGCCATTTAATCCCCTTCGTCGAGTTCGCCAAGCTCCTCGTCTCCCGCTTCAACCTCTCAGTCTC  
TCTCCTCATCCCCACTTTGGGGCAGCCCACCCGGGCCCCAAGTCTCCTTCCTCGACTCCCTCCCTTCAG  
CCATTTCCCACACCTTCCTTCCTCCTATTGACCCGGTCCAAGTCCCCCAAGGCGCAGGCCATGAGGTC  
ACCATCTCCCTTGTCTGACCCATTCTCTCTCCTCCATCCGGACCTCCCTGGTCCGCATGGCCCACCTC  
GTTGTTGCCCTTGTACCCGACCTGTTCCGTACCGACATCTTCGATGTTGCGAGGGAGCTGGGGATTCC  
TCCCTACATGTATTTTACATGCTCAGCTATGAACTTGATGTTCTCCTTCCATCTCCCTAGGTTGGATGA  
ACGGTGTCGTGTGACTACAAGGATATGCCCGGCCCGCTTCTCCTGCCCGGGTGCGTGCCCATTCACGG  
CCAAGATTTTGACGACCCGTGTCAGGACCGTAAGGGTGAGTGTTACAGGGTGTTGCTTCATCATTCAA  
AGAGGTACGTATTGGCTGAGGGTATTTTGTCAATACGTTTTTTGATCTCGAGCCGGGTGCTCTCCGGA  
CTTTGCAAAGTGAAGATCCGAATAGGCCTCCGGCTTACCCGATTGGCCCCATACTTCAGTCGGGTCAA  
GCGGGGGACATCGATGGGTCCGAGTGCTTGAGTTGGTTGGAGCGGCAACCAACCGGGTCGGTCCTAT  
ATGTGTCGTTTGGGAGTGGGGGGACTTTATCCAGAGAGCAGATCATTGAATTGGCAATTGGGCTTGAG  
GGAAGTGAGCAGAGGTTTTTGTGGGTGGTTAGAGGCGCAAGTGATCAACTCTCTCATGGGTCATTTTT  
CGGTGCCCAAAGTCTAGATGACCCATTTGGGTTCTTACCAAATGGATATCTCAATCGGATCAAAGATCG  
CGGGCTATTAGTCCCTTCATGGGGCCCCCAGATAAAGGTCCTTAGCCACAAGTCCACAGGCGGGTTCT  
TAACACATTGTGGATGGAAGTCGATTCTGGAGAGCATAATTAACGGGGTACCCTTGATTGCATGGCCAT  
TGTACGCGGAACAAAGGATGAATGCAGTAATGCTTACCCAAGGGCTTAAGGTCGCATTAAGGCCTATT  
GCTAATGCGAATGGCCTTTTTAGGGCAGATGAGATTGCTAGAGTCATCAAAGTTTTAATGAAAGGCGA  
AGAAGGGGAAATAATTCGCCATCGGATGAAAGAGCTAAGTGACTTGGCTAAGAAAGCTATGCGTGAA  
GATGGAGATTCTCAAAGTCACTTGCCCAGGTCGCTCACAAGTGGAATCAAAACAAACTTCTCCAGA  
AAGATTAA

MHVRANLAMEALVHQIAIIPSPGMGHLIPFVEFAKLLVSRFNLSVSLLIPTLGQPTRAQVSFLDSLPSAISHT  
FLPPIDPVQLPQGAGHEVTISLVLTHSLSSIRTSLVRMAHLVVALVTDLFGTDIFDVARELGIPPYMYFTCSA  
MNLMFSLPRLDETVSCDYKDMPGPLLLPGCVPIHGQDFDDPCQDRKGECYRVLLHHSKRYVLAEGIF  
VNTFFDLEPGALRTLQTENPNRPPAYPIGPILQSGQAGDIDGSECLSWLERQPTGSVLYVSFGSGGTL SREQ  
IIELAIGLEGSEQRFLWVVRGASDQLSHGSFFGAQSLDDPFGFLPNGYLNRIKDRGLLVPSWAPQIKVLSHK  
STGGFLTHCGWNSILESIINGVPLIAWPLYAEQRMNAVMLTQGLKVALRPIANANGLFRADEIARVIKVL M  
KGEEGEIIRHRMKELSDLAKKAMREDGDSSKSLAQVAHKWNQNKLLQKD

>HU11G01698.1-R

ATGGAAGAACCACACATTGTCATAGTCCCAAGCCCAGGAATGGGTCACATGATCCCCCTAGTTGAGTT

CGCAAAGCTCCTAGTCTCCCGCTTCAACTTCTCAGTCTCTCTCATCTCCCTACCTCCACCCAACCCAC  
CAAGGCCCAAACCTCCTTCCCTCAATGCCCTCCCTCCTTCCATTTCTCACACCTTCCTTCCCCCGGTGCA  
CCCGGCCCTTTTACCCGATGGTGTGGCCCATGAGGTAACCATCCACCACACCCTTGTCCACTCTCTCC  
CATCTCTACGGGCCGCCCTCTCCGACTTGGCCCAACGGATCCCGGTGCGCCGGTCTCGTCGCCGACCTC  
TTTGGGACTGACTGCTTCGACGTGGCCCGGGAGCTTGGAATTCTTCCTTACATGTACTTCACATCCAA  
CGCCATGTGCCTGCTGTTCCCTCAACCTTCCCCCGTTGGACAAAACGGTGTCTGTGTGAGTATCCGG  
ATATGCCTAACCCGCTTGTCTTACCCGGGTGCGTGCCGCTTTACGGTAAGGACTTTCCGGACCGTTGTA  
CGGACCGCAATGACGAGTCCTATAGGGTGGTGCTTTATCACGTGAAGAGGTATGTTTTGTCTGAGGGT  
ATTTTTGTCAACACGTTTTTTTGATCTCGAGCGCGGTGCTATCCGGGCTTTGCAAACCGAGGGTCCGAA  
CTGGCCCCCGGTTTATCCAGTCGGGCGCGTTATTAGTCGGGTCAAGGTGTGGAGACCGATGGATCAT  
CTGAGTGTGTTGAGCTGGTTAGACCCACAACCAACCGGGTCGGTTTTATTTGTGTCTGTTGGGAGTGGAA  
GGCACTTTATCAAAAAGGCAACTTAATGAATTGGCAATTGGGTTGGAGAAAAGTGGGCAGAGGTTCT  
TGTGGGTGGTTAGAAGCCCAAACGATCACTCCTCTAATGCGTCGTTCTTCACTGCCCAAAGTCAGGAC  
GACCCGCTCGGGTTCTTACCCCATGGATATCTTGATCGGATCAAAGACCGTGGGCTGTTGGTTCCGTC  
ATGGGGCCACAGATAAAGATTCTAAGCCATGCGTCCACTGGCGGGTCTTGACTCACTGTGGGTGGA  
ATTCAGTTCTCGAGAGCATAATCAATGGGGTGCCCTTAATTGCATGGCCATTATATGCAGAACAAAGAA  
TGAATGCAGTAATGCTTAACCAAGGGCTTAAGGTTGCAATAAGGCCTAATGCTAATGGACGCGGGCTA  
TATGAGGCCGATGAAATTGCCAGAGTCGTCAAAGAGTTGATGGAGGGTGAGGAAGGGAAGGGAGCT  
CGTCATCGGATGAAGGAAGTGAGTGATTTGGCTAAGAAGGCGATAAGCAAAGATGGAGATTCTTCAA  
AGTTACTTGCTGAGGTTGCTCATCAATGGAGTCATAGCAAGATTGTCCACTAA

MEEPHIVIVPSPGMGHMIPLVEFAKLLVSRFNFSVSLILPTSTQPTKAQTSFLNALPPSISHTFLPPVDPALLP  
DGVAHEVTIHHTLVHSLPSLRAALSDLAQRIPVAGLVADLFGTDCFDVARELGILPYMYFTSNAMCLLFL  
NLPLDKTVSCEYPDMPNPLVLPGCVPLYGKDFPDRCTDRNDESYRVVLYHVKRYVLSEGIFVNTFFDLE  
RGAIRALQTEGPNWPPVYPVGPVIQSGQGVETDGSSECLSWLDPQPTGSVLFVSFGSGGTLNQLNELAI  
GLEKSGQRFLWVVRSPNDHSSNASFFTAQSQDDPLGFLPHGYLDRIKDRGLLVPSWGPQIKILSHASTGGF  
LTHCGWNSVLESIINGVPLIAWPLYAEQRMNAVMLNQGLKVAIRPNANGRGLYEADRIARVVKELMEGEE  
GKGARHRMKEVSDLAKKAISKDGDSSKLLAEVAHQWSHSHKIVH

>HU11G01698.1-W

ATGGAAGAACCACACATTGTCATAGTCCCAAGCCCAGGAATGGGTACCTGATCCCCCTAGTTGAGTT  
CGCAAAGCTCCTAGTCTCCCACTTCAACTTCTCAGTCTCTCTCATCTCCCCACCTCCACCCAGCCCA  
CCAAGGCCCAAACCTCCTTCCCTCAATGCCCTCCCTCCTTCCATTTCTCACACCTTCCTTCCCCCGGTG  
ACCCGGCCCTTTTACCCGATGGTGTGGCCCATGAGGTAACCATCCACCACACCCTTGTCCACTCTCTC  
CCATCTCTACGGACCGCCCTCTCCGACTTGGCCCAATGGACCCCGGTGCGCCGGTCTCGTCGCCGACCT  
CTTTGGGACTGACTGCTTCGACGTGGCCCGGGAGCTTGGAATTCTTCCTTACATGTACTTCACATCCA  
ACGCCATGTGCCTGCTGTTCCCTCAACCTTCCCCCGTTGGACAAAACGGTGTCTGTGTGAGTATCCG  
GATATGGCTAACCCGCTTGTCTTACCCGGGTGCGTGCCGCTTTACGGTAAGGACTTTCCGGACCGTTG  
TATGGACCGCAATGACGAGTCCTATAGGGTGGTGCTTTATCATGTGAAGAGGTATGTTTTGTCTGAGGG



TATTTTGTCAACACGTTTTTTGATCTCGAGCGCGGTGCTATCCGGGCTTTGCAAACCGAGGGTCCGA  
ACTGGCCCCCGGTTTATCCAGTCGGGCCGGTTATTAGTCGGGTCAAGGTGTGGAGACCGATGGATCA  
TCTGAGTGTGTTGAGCTGGTTAGACCGACAACCAACC**GGGTCGGTTTTATTTGTGTCGTTTGGGAGTGG**  
**AGGCACTTTATCAAAAAGGCAACTTAATGAATTGGCAATTGGGTTGGAGAAAAGTGGGCAGAGGTTT**  
**TTGTGGGTGGTTAGAAGCCCAAACGATCACTCCTCTAACGCGTCGTTCTTCACTGCCCAAAGTC**AGG  
ACGACCCGCTCGGGTTCCTACCCCATGGATATCTTGATCGGATCAAAGACCGTGGGCTGTTGGTTCCG  
TCATGGGGCCCACAGATAAAGATTCTAAGCCATGCGTCCACTGGCGGGTCTTGACTCACTGTGGGTG  
GAATTCAGTTCTCGAGAGCATAATCAATGGGGTGCCCTTAATTGCATGGCCATTATATGCAGAACAAAG  
AATGAATGCAGTAATGCTTAACCAAGGGCTTAAGGTTGCAATAAGGCCTAATGCTAATGGACGCGGGC  
TATATGAGGCCGATGAAATTGCCAGAGTCGTCAAAGAGTTGATGGAGGGTGAGGAAGGGAAGGGAG  
CTCGTCATCGGATGAAGGAAGTGAGTGATTTGGCTAAGAAGGCGATAAGCAAAGATGGAGATTCTTC  
AAAGTTACTTGCTGAGGTTGCTCATCAATGGAGTCATAGCAAGATTGTCCACTAA

MEEPHIVIVPSPGMGHLIPLVEFAKLLVSHFNFSVSLILPTSTQPTKAQTSFLNALPPSISHTFLPPVDPALLP  
DGVAHEVTIHHTLVHSLPSLRTALSDLAQWTPVAGLVADLFGTDCFDVARELGILPYMYFTSNAMCLLFL  
NLPLDKTVSCEYPDMANPLVLP GCVPLYGKDFPDRCMDRND ESYRVVLYHV KRYVLSE GIFVNTFFDLE  
RGAIRALQTEGPNWPPVYPVGPVIQSGQGVETDGSSECLSWLDRQPTGSVLFVSFGSGGTLSKRQLNELA  
IGLEKSGQRFLWVVRSPNDHSSNASFFTAQSQDDPLGLPHGYLDRIKDRGLLVPSWGPQIKILSHASTGG  
FLTHCGWNSVLESIINGVPLIAWPLYAEQRMNAVMLNQGLKVAIRPNANGRGLYEADEIARVVKELMEGE  
EGKGARHRMKEVSDLAKKAISKDGDSSKLLAEVAHQWWSHIVH

#### cDOPA5GT

>HU05G01532.1-R

ATGGAGAGGGTTGAGCAGGACAGCAAGCTAAGGAAGAGATTGCTCCTCTTCCCTCTACCTTTCCAAC  
GCCATATAACACCAATGCTCCATTTAGCCATCCTTCTCTACTCCAAAGGCTTCTCCATCACCATAATCCA  
AACCAACTACAAGTCTCTCAATCCCACCACTT**TCCCTCACTTCACCTTTTCATTTATCAATGATGGCTT**  
**GTCAATGTTGAGGAAGCCGCGAGCCTCCCAATCCCCTTTCGTCCTCCTTTCAGCCCTTAATGCGGACT**  
**GCTTAGAGCCCTTCAGAGAATGCCTGTCTTGGGTTATGAATGGTGGT**GATGCCAATGATCAGGAAGCA  
GTTGCTTGCCCGATAGCAGACACTACATGGCAGTTTGCTGGGTCTGTGGCTGATAGCTTCAAACCTGCC  
TAGAGTCGCACTTAGGACTGGTTGTATATCTGCCTTTGTTGTCCATGATTCTCTTTCGCTTCTCCGAGA  
AAAGGGCTATTTTCCTACACAAGAAACAAGATTGGATGAAGTGGTGCCAGAGCTTTCACCACTAAAA  
GTGAAAGACCTTCCCTTGAGGGCGCAGCATGACTTCTCGCGGCTCTAATCAAAGAGACGATATCCTC  
TAAGGGAACCATCTACAACCTCGTTTGAGGAGCTGGAAAGTTCTGCATTTTCCCGGGTTCAACGAGACT  
TGCCCATCCCTGTCTTCCCAATAGGTCCACTACACAGTCATTACCAAGCTTGGTCACCCAACACAAGT  
GATCAAGACCAAACCAACCATGTCCTGGCTAGACACACAAGCACCCAACACTGTTCCATACGTGAGCT  
TTGGGAGCGTCATGACAATGAGCAAATCTGATCTTGTTGAATTAGCATGGGGTTTAGCCACAGCATG  
CAGCCATTCTTGTTGGGTGGTTCGATCAGGGTTAGTTAAGGGGGTCCAAGAAAATGACCCACTGTCAG

AGGGCTTCTTTGACTACTTGGATGGAAGAGAGCACATTGTAAATGGGCTCATCAAAATGAAGTTCTG  
GCTACCCCCGAGTTGGAGGCTTCTTGAGTCATTGTGGGTGGAACCTGACTCTGGAGAGCATCTATGC  
GGGGGTGCATATGATTTGTTTGCCCCTGTTTGCTGATCAGGCAATCAATGCGAGGTAA

MERVEQDSKLRKRLLLFPLPFQRHITPMLHLAILLYSKGFSITIIQTNYKSLNPTTFPHFTFHFINDGLSMFEE  
AAASQSPFVLLSALNADCLEPFRECLSWVMNGGDANDQEAVACPIADTTWQFAGSVADSFKLPRVALRT  
GCISAFVVHDSLSLLREKGYFPTQETRLDELVPELSPLKVKDLPLEAQHDFLAALIKETISSKGTIYNSFEEL  
ESSAFSRVQRDLPIPVFPIGPLHSHSPAWSPNTSDQDQTTMSWLDTQAPNTVPYVSFGSVMTMSKSDLVEL  
AWGLAHSMQPFLWVVRSGLVKGVQENDPLSEGFFDYLDGREHIVKWAHQNEVLAHPAVGGFLSHCGW  
NSTLESIYAGVHMICLPLFADQAINAR

>HU05G01532.1-W

ATGGAGAGGGTTGAGCAGGACAGCAAGCTAAGGAAGAGATTGCTCCTCTTCCCTCTACCTTTCCAAC  
GCCATATAACACCAATGCTCCATTTAGCCATCCTTCTCTACTCCAAAGGCTTCTCCATCACCATAATCCA  
AACCAACTACAAGTCTCTCAATCCCACCACCTTCCCTCACTTACCTTTTCATTTATCAATGATGGCTT  
GTCAATGTTGAGGAAGCCGCGAGCCTCCCAATCCCCTTTCGTCCTCCTTTCAGCCCTTAATGCGGACT  
GCTTAGAGCCCTTCAGAGAATGCCTGTCTTGGGTATGAATGGTGGTGATGCCAATGATCAGGAAGCA  
GTTGCTTGCCCGATAGCAGACACTACATGGCAGTTTGTGTTGGTCTGTGGCTGATAGCTTCAAACCTGCC  
TAGAGTCGCACTTAGGACTGGTTGTATATCTGCCTTTGTTGTCCATGATTCTCTTTCGCTTCTCCGAGA  
AAAGGGCTATTTTCCTACACAAGAAACAAGATTGGATGAAGTGGTGCCAGAGCTTTCACCACTAAAA  
GTGAAAGACCTTCCCTTGGAGGCGCAGCATGACTTCTCGCGGCTCTAATCAAAGAGACGATATCCTC  
TAAGGGAACCATCTACAACCTCGTTTGAGGAGCTGGAAAGTTCTGCATTTTCCCGGGTTCAACGAGACT  
TGCCCATCCCTGTCTTCCCAATAGGTCCACTACACAGTCATTCACCAGCTTGGTCACCCAACACAAGT  
GATCAAGACCAAACCACCATGTCTGGCTAGACACACAAGCACCCAACACTGTTCCATACGTGAGCT  
TTGGGAGCGTCATGACAATGAGCAAATCTGATCTTGTGAATTAGCATGGGGTTTAGCCACAGCATG  
CAGCCATTCTTGTGGGTGGTTCGATCAGGGTTAGTTAAGGGGGTCCAAGAAAATGACCCACTGTCAG  
AGGGCTTCTTTGACTACTTGGATGGAAGAGAGCACATTGTAAATGGGCTCATCAAAATGAAGTTCTG  
GCTACCCCCGAGTTGGAGGCTTCTTGAGTCATTGTGGGTGGAACCTGACTCTGGAGAGCATCTATGC  
GGGGGTGCATATGATTTGTTTGCCCCTGTTTGCTGATCAGGCAATCAATGCGAGGTAA

MERVEQDSKLRKRLLLFPLPFQRHITPMLHLAILLYSKGFSITIIQTNYKSLNPTTFPHFTFHFINDGLSMFEE  
AAASQSPFVLLSALNADCLEPFRECLSWVMNGGDANDQEAVACPIADTTWQFAGSVADSFKLPRVALRT  
GCISAFVVHDSLSLLREKGYFPTQETRLDELVPELSPLKVKDLPLEAQHDFLAALIKETISSKGTIYNSFEEL  
ESSAFSRVQRDLPIPVFPIGPLHSHSPAWSPNTSDQDQTTMSWLDTQAPNTVPYVSFGSVMTMSKSDLVEL  
AWGLAHSMQPFLWVVRSGLVKGVQENDPLSEGFFDYLDGREHIVKWAHQNEVLAHPAVGGFLSHCGW  
NSTLESIYAGVHMICLPLFADQAINAR

>HU07G00240.1-R

ATGGACTCTGCAACAGAGCATATACTGATGCTCCCATACATGGCGCAGGGTCACATTCGCCCCGTTTCATC  
GAGCTAGCCCACCGCCTCCAAGCCCGAACTGAAACCAGAACCCGAACCCACTTCACCATCACCATCC

TCACCACCCCTCTCAACGCTGAGCTCATCCGACGCCAATTCACCACCACCTCCACCATCCAAATTGCC  
GAGCTCCCCTTCAACGCCGCCGACCATGGCCTCCCTGCTGGCGTCGAGAACACCGACAAGCTCCCGT  
TCCCCCTCGTCGTCAACCTCTTCCACGCCTCCTCCTCGCTTGAACCCACCTCCGCCACTTCATCGCC  
ACCCGCTTCTCCCCCTGTAAACCCCTCTCTGCATTGTCTTCGACGTCTTCCTGGGATGGGTTGACGCC  
GTCGCTAGGAGCTTTGGATCCACCGGAGTCGCCTTCACCACCGGCGGCGGTATGGGACGGCGGCGT  
ATTTGTCACTGTGGCTTGATCTACCTACCGAACTTCTCAGACGATGAGGACTTCCCTTTGCCTGGAT  
TCCCGGAGAACCACCGCTATCGCCGCTCCAGCTCCACCGGTTCTTAAGATACGCTGATGGGTCTCGAT  
CAGTGGTCGCGGTTTTTCCAGCCCCAGCTGCGGTTCTCAATTGGTAGCCTCGGATGGCTCTGTAATTC  
CGTCGAGGAGATTGAGCCTCTGGGGTTTGAAATTCTTCGGAATTACCTCAAATCACCGGTCTGGGCAG  
TCGGGCCGTTGATTCCGGATCCTCCGCCGGTGGATAAATCATCATCTTCTTGTGACAAATGCATCCAGT  
GGTTAAATCCACAAAGCCGATTCCGTTTTATACATCTCATTCCGGTTCGAGAATACGATTTCCCCGA  
CCCAGATGATGGAGCTGGCTATGGGTTTAGAGCTAAGTGGGAAGCCATTTTTGTGGGTGATCCGGCCT  
CCGTTCCGGGTCGACATCAACGGAGAATTCCGACTCGAATGGCTTCCGGATGGGTTCCGAGGAGCGCG  
TGAAGAACAACAACCAGGGGATGTTGGTGCATAAATGGGGGCCTCAAATGGAGATACTGGGTTCATGA  
ATCAACGGGTGGGTTTCTCAGCCATTGTGGGTGGAACCTCGGTGTTGGAAGGACTGAGAGAGGGACTA  
CCGATGATAGCGTGGCCATTGGCTGGGGAGCAGGCGTACAATTCGAAGATGCTGGTGGAGGAGATGG  
CGGTGGCAGTGGAGCTGACGACGGGGTTGGAAGGGAAGGTGACTAAGGAGGCGGTGAAGAGGGTG  
GTGGAGCTGGTGTGTTGGGGAGAGAGGAAGGGAGTGGTGGCGAGGAGATGAAGAAGAAGGCGGTTGA  
AGCAGGGAAGAAGCTTAGAGATGCATTAAGAGAAGAGGAAGATGGGTAGGGTTTAAGGGATCTTCG  
ATTAAAGCAATGGATGAGTTTTTGGATGCCATAGTTTCCGGCAGGGATCGACCAGCTGCTTGA

MDSATEHILMLPYMAQGHIRPFIELAHLRLQARTETRTRTHFTITILTTPPLNAELIRRQFTTTSTIQIAELPFNA  
ADHGLPAGVENTDKLPFLVNLFHASSSLEPHLRHFIATRFSPCKPPLCIVFDVFLGWVDAVARSFSGSTGV  
AFTTGAYGTAAAYLSLWLDLPHRNFSDDEDPLPGFPENHRYRRSQLHRFLRYADGSDQWSRFFQPQLRF  
SIGSLGWLCNSVEEIEPLGFEILRNYLKSPVWAVGPLIPDPPVVKSSSSCDKCIQWLNHSHKADSVLYISFGS  
QNTISPTQMMELAMGLELSGKPFLWVIRPPFGFDINGEFRLEWLPDGFEEVKNNNQGMLVHKWGPQME  
ILGHSTGGFLSHCGWNSVLEGLREGLPMIAWPLAGEQAYNSKMLVEEMAVAVELTTGLEGKVTKAVK  
RVVELVLGREGSGGEEMKKKAVEAGKKLRDALREEEDGLGFKGSSIKAMDEFLDAIVSGRDRPAA

>HU07G00240.1-W

ATGGACTCTGCAACAGAGCATATACTGATGCTCCCATACATGGCGCAGGGTCACATTCGCCCCGTTTCATC  
GAGCTAGCCCACCGCCTCCAAGCCCGAACTGAAACCAGAACCCGAACCCACTTCACCATCACCATCC  
TCACCACCCCTCTCAACGCTGAGCTCATCCGACGCCAATTCACCACCACCTCCACCATCCAAATTGCC  
GAGCTCCCCTTCAACGCCGCCGACCATGGCCTCCCTGCTGGCGTCGAGAACACCGACAAGCTCCCGT  
TCCCCCTCGTCGTCAACCTCTTCCACGCCTCCTCCTCGCTTGAACCCACCTCCGCCACTTCATCGCC  
ACCCGCTTCTCCCCCTGTAAACCCCTCTCTGCATTGTCTTCGACGTCTTCCTGGGATGGGTTGACGCC  
GTCGCTAGGAGCTTTGGATCCACCGGAGTCGCCTTCACCACCGGCGGCGGTATGGGACGGCGGCGT  
ATTTGTCACTGTGGCTTGATCTACCTACCGAACTTCTCAGACGATGAGGACTTCCCTTTGCCTGGAT  
TCCCGGAGAACCACCGCTATCGCCGCTCCAGCTCCACCGGTTCTTAAGATACGCTGATGGGTCTCGAT

CAGTGGTCGCGGTTTTTCCAGCCCCAGCTGCGGTTCTCAATTGGTAGCCTCGGATGGCTCTGTAATTC  
CGTCGAGGAGATTGAGCCTCTGGGGTTTGAAATTCTTCGGAATTACCTCAAATCACCGGTCTGGGCAG  
TCGGGCCGTTGATTCCGGATCCTCCGCCGGTGGATAAATCATCATCTTCTTGTGACAAATGCATCCAGT  
GGTTAAATTCCACAAAGCCGATTCCGTTTTATACATCTCATTGCGGTTCGCAGAATACGATTTCCCCGA  
CCCAGATGATGGAGCTGGCTATGGGTTTAGAGCTAAGTGGGAAGCCATTTTTGTGGGTGATCCGGCCT  
CCGTTTCGGGTTTCGACATCAACGGAGAATTCCGACTCGAATGGCTTCCGGATGGGTTCGAGGAGCGCG  
TGAAGAACAACAACCAGGGGATGTTGGTGCATAAATGGGGGCCTCAAATGGAGATACTGGGTCATGA  
ATCAACGGGTGGGTTTCTCAGCCATTGTGGGTGGAAGTCCGGTGTGGAAGGACTGAGAGAGGGACTA  
CCGATGATAGCGTGGCCATTGGCTGGGGAGCAGGCGTACAATTCGAAGATGCTGGTGGAGGAGATGG  
CGGTGGCAGTGGAGCTGACGACGGGGTTGGAAGGGAAGGTGACTAAGGAGGCGGTGAAGAGGGTG  
GTGGAGCTGGTGTGTTGGGGAGAGAGGAAGGGAGTGGTGGCGAGGAGATGAAGAAGAAGGCGGTTGA  
AGCAGGGAAGAAGCTTAGAGATGCATTAAGAGAAGAGGAAGATGGGTAGGGTTTAAGGGATCTTCG  
ATTAAAGCAATGGATGAGTTTTTGGATGCCATAGTTTCCGGCAGGGATCGACCAGCTGCTTGA

MDSATEHILMLPYMAQGHIRPFIELAHRLQARTETRTRTHFTITILTTPLNAELIRRQFTTTSTIQIAELPFNA  
ADHGLPAGVENTDKLPFLVNLFHASSSLEPHLRHFIATRFSPCKPPLCIVFDVFLGWVDAVARSGSTGV  
AFTTGAYGTAAYLSLWLDLPHRNFSDDEDPLPGFPENHRYRRSQLHRFLRYADGSDQWSRFFQPQLRF  
SIGSLGWLCNSVEEIEPLGFEILRNYLKSPVWAVGPLIPDPPPVDKSSSSCDKCIQWLNHSHKADSVLYISFGS  
QNTISPTQMMELAMGLELSGKPFLWVIRPPFGFDINGEFRLEWLPDGFEEVRKNNNQGMLVHKWGPQME  
ILGHESTGGFLSHCGWNSVLEGLREGLPMIAWPLAGEQAYNSKMLVEEMAVAVELTTGLEGKVTKAVK  
RVVELVLGREGSGGEEMKKKAVEAGKKLRDALREEEDGLGFKGSSIKAMDEFLDAIVSGRDRPAA

>HU08G02083.1-R

ATGGAGAACTCAAGCTATAATAATAATAAGCAGGTGAAAATCGAGAAGCCTCATGCAATAATCGTAGC  
CCTTCCTTTGCAAGGCCATGTAATCCCAACCGTCCAAGTGGCCCTGAAATTAGCATCCAAGGGGTTCT  
CTATCACCTTCATCAACGCCGAGAACATCCACCACCGCATCACCGCCGCAGCTTCCGTTGCAGACGGC  
AGGCTCTTCGGTGGTGATGAGGATATAGAATACGTCACCGTATCGGACGGGCTGCCGGTGGAGTACGA  
TAGGTCGCTGAACCATGACCGGTGGGTGGGGGCTACTATCCACTGCTACCCGGCCACGTTGAGATGG  
CTGTGGAGAACATCCTCAAAGCTCGACCGTCGGATAGGTTTTGCTTGATTGCTGACGTGTACTCTGTT  
TGGGCGTCTGACATGGCTAAGAAGTTTGGGTGGTACACGTGGCCTTTTGGACTGAGGCTGCTTTGGT  
TTTTGATATCTACCTTCATCGCCATTGCTCCAACAGAATGGTCATGTTGGTCCCGGTGC**CCGCAAGGA**  
**CACAATAGACTATATACCAGGAGTAAATCAATAAAACCAACGGACCTGATGTCATATCTCCAAGGAG**  
**AGGACCTGACAACTATCTGCCATCAGTTCATTTTCCAGT**GCATGGACGATGCTAAACGGGCCGATTTT  
GTATTAGGCAATACGGTCCAAGAGCTTGAAGATCGCCCAATTTCTGCTATTCAGGCCCAAGTCCCAAT  
CTTTGCAATTGGGCCTTTGTTTTTACCTGGATTTCTTAAGAGCCCAGTAGCCACTAGCTTATGGGCCGA  
GTCAGATTGCACTCAATGGCTAAACTCCAAGCCTCCTAGCTCGGTTTTGTACGTCTCATTTGGTAGCTA  
TGCGCATATTAGAAAGGATGAGCTCGTAGAGATTGCTAATGGAATCAAGCTTAGTAGGGTCAACTTCC  
TTTGGGCCCTCCGGCCAGATATGGTGAGCTCCGATGACTCAGACCCACTTCCAAATGGGTTTAAGGAT  
GAGGTCCAGGGCCGAGGGATGGTTGTCACTTGGACCAGTCAGACTGAGGTGTTGTATAATAAAGCGA

TTGGAGGGTTCTTGACACACTGTGGGTGGAACCTCGATACTTGAGAGTATATGGTGTGAAGTTCCCCTA  
CTGTGCTTTCCTCTACTGACGGATCAGTTTACTAATCGAAAGCTGATTGTGGAAGAGTGGAAGATTGG  
ATGCAATCTTTGTGACGAGAATAATTCACCAACGACCGAGGAGGTGTCGAGGAAAATCAAGGATTTG  
ATGCATGGAAAAAGAGGGCACGAGCTCAAGGAGAAGATTAAGAAGATCAAGCAAATTGTAGAGAAT  
GCAAGGCTGCCTCAAGGATCATCAGAGAGGAATGTTGACGAGTTCATGAAGGAATTGGGTGTGGCTT  
TTGACAAGAAATTGGCAACAAATGCCTAA

MENSSYNNNKQVKIEKPHAIIVALPLQGHVIPTVQLALKLASKGFSITFINAENIHHRITAAASVADGRLFG  
GDEDIEYVTVSDGLPVEYDRSLNHDRWVGATIHCPAHVEMAVENILKARPSDRFCLIADVYSVWASDM  
AKKFGLVHVAFWTEAALVFDIYLHRHLLQQNGHVGPARGKDTIDYIPGVKSIKPTDLMSYLQGEDLTIC  
HQFIFQCMDDAKRADFVLGNTVQELED RPISAIQAQVPIFAIGPLFSPGF PKSPVATSLWAESDCTQWLNSK  
PPSSVLYVSFGSYAHIRKDELVEIANGIKLSRVNFWALRPDMVSSDDSDPLPNGFKDEVQGRGMVVTWT  
SQTEVLYNKAIGGFLTHCGWNSILESIWCEVPLLCPLLTDQFTNRKLIVEEWKIGCNLCDENNSPTTEEVS  
RKIKDLMHGKRGHELKEKIKKIKQIVENARLPQGSSERNVDEFMKELGVAFDKKLATNA

>HU08G02083.1-W

ATGGAGAACTCAAGCTATAATAATAATAAGCAGGTGAAAATCGAGAAGCCTCATGCAATAATCGTAGC  
CCTTCCTTTGCAAGGCCATGTAATCCCAACCGTCCAACCTGGCCCTGAAATTAGCATCCAAGGGGTCT  
CTATCACCTTCATCAACGCCGAGAACATCCACCACCGCATCACCGCCGCAGCTTCCGTTGCAGACGGC  
AGGCTCTTCGGTGGTGATGAGGATATAGAATACGTCACCGTATCGGACGGGCTGCCGGTGGAGTACGA  
TAGGTGCTGAACCATGACCGGTGGGTGGGGGCTACTATCCACTGCTACCCGGCCACGTTGAGATGG  
CTGTGGAGAACATCCTCAAAGCTCGACCGTCGGATAGGTTTTGCTTGATTGCTGACGTGTACTCTGTT  
TGGGCGTCTGACATGGCTAAGAAGTTTGGGTGGTACACGTGGCCTTTTGGACTGAGGCTGCTTTGGT  
TTTTGATATCTACCTTCATCGCCATTTGCTCCAACAGAATGGTCATGTTGGTCCCGGTGC**CCGCAAGGA**  
**CACAATAGACTATATACCAGGAGTAAATCAATAAAACCAACGGACCTGATGTCATATCTCCAAGGAG**  
**AGGACCTGACAACCTATCTGCCATCAGTTCATTTTCCAGT**GCATGGACGATGCTAAACGGGCCGATTTT  
GTATTAGGCAATACGGTCCAAGAGCTTGAAGATCGCCCAATTTCTGCTATTCAGGCCCAAGTCCCAAT  
CTTTGCAATTGGGCCTTTGTTTTACCTGGATTTCCTAAGAGCCCAGTAGCCACTAGCTTATGGGCCGA  
GTCAGATTGCACTCAATGGCTAAACTCCAAGCCTCCTAGCTCGGTTTTGTACGTCTCATTGGTAGCTA  
TGCGCATATTAGAAAGGATGAGCTCGTAGAGATTGCTAATGGAATCAAGCTTAGTAGGGTCAACTTCC  
TTTGGGCCCTCCGGCCAGATATGGTGAGCTCCGATGACTCAGACCCACTTCCAAATGGGTTTAAGGAT  
GAGGTCCAGGGCCGAGGGATGGTTGTCACTTGGACCAGTCAGACTGAGGTGTTGTATAATAAAGCGA  
TTGGAGGGTTCTTGACACACTGTGGGTGGAACCTCGATACTTGAGAGTATATGGTGTGAAGTTCCCCTA  
CTGTGCTTTCCTCTACTGACGGATCAGTTTACTAATCGAAAGCTGATTGTGGAAGAGTGGAAGATTGG  
ATGCAATCTTTGTGACGAGAATAATTCACCAACGACGGAGGAGGTGTCGAGGAAAATCAAGGATTTG  
ATGCATGGAAAAAGAGGGCACGAGCTCAAGGAGAAGATTAAGAAGATCAAGCAAATTGTAGAGAAT  
GCAAGGCTGCCTCAAGGATCATCAGAGAGGAATGTTGACGAGTTCATGAAGGAATTGGGTGTGGCTT  
TTGACAAGAAATTGGCAACAAATGCCTAA

MENSSYNNNKQVKIEKPHAIIVALPLQGHVIPTVQLALKLASKGFSITFINAENIHRITAAASVADGRLFG  
GDEDIEYVTVSDGLPVEYDRSLNHDRWVGATIHCPAHVEMAVENILKARPSDRFCLIADVSVWASDM  
AKKFGLVHVAFWTEAALVFDIYLHRHLLQQNGHVGPARKDTIDYIPGVKSIKPTDLMSYLQGEDLTIC  
HQFIFQCMDDAKRADFVLGNTVQELED RPISAIQAQVPIFAIGPLFSPGFPKSPVATSLWAESDCTQWLNSK  
PPSSVLYVSFGSYAHIRKDELVEIANGIKLSRVNFWALRPDMVSSDDSDPLPNGFKDEVQGRGMVVTWT  
SQTEVLYNKAIGGFLTHCGWNSILESIWCEVPLLCFPLLDQFTNRKLIVEEWKIGCNLCDENNSPTTEEVS  
RKIKDLMHGKRGHELKEKIKKIKQIVENARLPQGSSERNVDEFMKELGVAFDCKLATNA

>HU09G01874.1-R

ATGGACATCTGGGAAATTCTCACTGAAAAGCCCTTTCAGCTTGATCCTGATATCCCACAAACATTCCC  
TCCAGTGAAGGCTGCTTCACCTCAGAGTTCTTAGACTTCTTATATAAACAATAGAGCTCCTGGACTTC  
CAATCTGGAAAAGTGTCAATACGTGCAGGGTTATAGAAGCTAGATATTTGGAGCTACTGGAAAGGCT  
ACCAATTTATGGAAACATGAAAACCTTCGCCATTGGACCTCTTAATCCAGTGCAAATCAGAAGGACAA  
GTGAGAAGCAACGACATGAATGTCTAGAATGGCTAGATAAACAAGAGGAGAATTCTGTGATATATGTC  
TCCTTCGGATCGACAACAGCGATGACTGATGAGCAGATCACAGAGTTGGCGAAAGGGTTGGAACAAA  
GCGGGCAGAAGTTTATATGGGTGCTTAGAAAAGCTGATAAAGGCGACATTTTATGGGAGATGAAGAG  
GGAAGGCCTCAGCAGCCAGAAGGGTATGAAGAGAGGGTGAAGGACAGGGGAATGGTGGTGAGAGA  
CTGGGCACCACAGCTGGAAATTCTCGGTACCCATCAACAGGTGGGTTCATGAGTCACTGTGGGTGG  
AATTCATGCATAGAGAGTATCAGCATGGGTGTACCAGTTGTGGCATGGCCGATGCACTCTGACCAGCC  
TCGGAATGCCACTTTGTTGACAGAAGTGCTAAGAATTGGATTATTGATCAAGGATTGCGTGCATCTAGC  
TGAGCTGGTGACATCAGATACCATAGAGGATGCTGTGAGACGACTGATGACATCACAGGAAGGAGAG  
GAGATGAAGAAAAAGGCAGAAAAACTAGGCGAGGCTGTTTCGAGCTTCAGTCGCTGAAGGTGGTGCT  
TCTCGCTTGGAATGGATTCTTTCATTGCTCATATTACCAGATAA

MDIWEILTEKPFQLDPDIPTNIPSSSEGCTSEFLDFLYKQIELLDFQSGKLFNTRVIEARYLELLERLPIYGN  
MKTFAIGPLNPVQIRRTSEKQRHECLEWLDKQEENSVIYVSFGSTTAMTDEQITELAKGLEQSGQKFIWVL  
RKADKGDIFMGDEEGRPQQPEGYEERVKDRGMVVRDWAPQLEILGHPSTGGFMSHCWNSCIESISMGV  
PVVAWPMHSDQPRNATLLTEVLRIGLLIKDCVHLAELVTSdTIEDAVRRLMTSQEGEEMKKKAEKLGEAV  
RASVAEGGASRLEMDSFIAHITR

>HU09G01874.1-W

ATGGACATCTGGGAAATTCTCACTGAAAAGCCCTTTCAGCTTGATCCTGATATCCCACAAACATTCCC  
TCCAGTGAAGGCTGCTTCACCTCAGAGTTCTTAGACTTCTTATATAAACAATAGAGCTCCTGGACTTC  
CAATCTGGAAAAGTGTCAATACGTGCAGGGTTATAGAAGCTAGATATTTGGAGCTACTGGAAAGGCT  
ACCAATTTATGGAAACATGAAAACCTTCGCCATTGGACCTCTTAATCCAGTGCAAATCAGAAGGACAA  
GTGAGAAGCAGCAACATGAATGTCTAGAATGGCTAGATAAACAAGAGGAGAATTCTGTGATATATGTC  
TCCTTCGGATCGACAACAGCGATGACTGATGAGCAGATCACAGAGTTGGCGAAAGGGTTGGAACAAA  
GCGGGCAGAAGTTTATATGGGTGCTTAGAAAAGCTGATAAAGGCGACATTTTATGGGAGATGAAGAG  
GGAAGGCCTCAGCAGCCAGAGGGGTATGAAGAGAGGGTAAAGGACAGGGGAATGGTGGTGAGAGA

CTGGGCACCACAGCTGGAAATTCTCGGTCACCCATCAACAGGTGGGTTCATGAGTCACTGTGGGTGG  
AATTCATGCATAGAGAGTATCAGCATGGGTGTACCAGTTGTGGCATGGCCGATGCACTCTGACCAGCC  
TCGGAATGCCACTTTGTTGACAGAAGTGCTAAGAATTGGATTATTGATCAAGGATTGCGTGCATCTAGC  
TGAGCTGGTGACATCAGATACCATAGAGGATGCTGTGAGAAGACTGATGACATCACAGGAAGGAGAG  
GAGATGAAGAAAAGGGCAGAAAACTAGGCGAGGCTGTTCGAGCTTCAGTCGCTGAAGGTGGTGCT  
TCTCGCTTGGAATGGATTCTTTCGTTGCTCATATTACCAGATAA

MDIWEILTEKPFQLDPDIPTNIPSSSEGCTSEFLDFLYKQIELLDFQSGKLFNTRVIEARYLELLERLPIYGN  
MKTFAIGPLNPVQIRRTSEKQQHECLEWLDKQEENSVIYVSFGSTTAMTDEQITELAKGLEQSGQKFIWVL  
RKADKGDIFMGDEEGRPQQPEGYEERVKDRGMVVRDWAPQLEILGHPSTGGFMSHCGWNSCIESISMGV  
PVVAWPMHSDQPRNATLLTEVLRIGLLIKDCVHLAELVTSDTIEDAVRRLMTSQEGEEMKKRAEKLGEAV  
RASVAEGGASRLEMDSFVAHITR

>HU09G01875.1-R

ATGGAAAGCCAGAGTTGCTGCCAAAATGGTATCCAGAAGGGCCAAAAATCTGCTGAAGTAGCTGTG  
GTCATGGTGCCCTTCCTAGCCCAAGGCCATCTCAACCAGTTCCTCCATCTCTCTCATCATCTCGTAGC  
CTCCTATGGCATAACCACTTCACTACGCTGGGTCTGCCATCCACAACCGCCAAGCCAAGCTACGGTTC  
CATGGTTGGGACCCGAACTTCCAACAGAATTGAGTTCCACGACCTACAGCTCCCTCCTTACAGCT  
CACCTCTCCAAACCCAAATGCAGCTACACATTTCCCTGCGCACCTCCAGCCTCTTTTCGATGCTTCT  
ATGCAACTCCGCGAACCCCTTTTCCAAGTCTGCCGAGACCTCTCGACCAAGTTCAGGAGAATTGTCA  
TAATTCATGATACCATAGTAGGTTCAATTGTTCAAGATGTAAACTCATCCCAAATGCCGAGGCTTA  
CGTGCTTGTTCCAACCTCGGCTTTTCAAACATCTATGGGCATCACGAAAAATCTTACTGAAAAGCCC  
TTTCAGCTTGACCCTGATATCCCAACAAACATTCCTCCAATGAAGGCTGCTTCACCTCAGAGTTCTT  
AGACTTCGCATATAAAACAAATAGAGCTCCTGGACTTCCAATCTGGAAAACTGTTCAATACATGCAGG  
GTTATAGAAGATAGATATTTGGAGCTACTGGAAAGGCTACCAATTTATGGAAACATGAAAACCTTCG  
CCATTGGACCTCTTAATCCAGTGCAAATCAGAAGGACAAGTGAGAAGCAACGACATGAATGTCTAG  
AATGGCTAGATAAACAAGAGGAGAATTCTGTGATATATGTCTCCTTCGGATCGACAACAGCGATGA  
CTGATGAGCAGATCACAGAGTTGGCGAAAGGGTTGGAACAAAGCGGGCAGAAGTTTATATGGGTGC  
TTAGAAAAGCTGATAAAGGCGACATTTTATGGGAGATGAAGAGGGAAGGCCTCAGCAGCCAGAAG  
GGTATGAAGAGAGGGTAAAGGACTGGGGAATGGTGGTGAGATACTGGGCACCACAGCTGGAAATTC  
TCGGTCACCCATCAACAGGTGGGTTCATGAGTCACTGTGGGTGGAATTCATGCATAGAGAGTATCAG  
CATGGGTGTACCAGTTGTGGCATGGCCGATGCACTCTGACCAGCCTAGGAATGCCACTTTGTTGACA  
GAAGTGCTAAGAATTGGATTATTGATCAAGGATTGCGTGCATCTAGCTGAGCTGGTGACATCAGATA  
CCATAGAGGATGCTGTGAGACGACTGATGACATCACAGGAAGGAGAGGAGATGAAGAAAAAGGCA  
GAAAAACTAGGCGAGGCTGTTCGAGCTTCAGTCGCTGAAGGTGGTGCTTCTCGCTTGGAATGGATT  
CTTTCATTGCTCATATTACCAGATAA

MESQSCCQNGIQKGQKSAEVAVVMVPFLAQGHLNQFLHLSHHLVASYGIPVHYAGSAIHNQAKLRFH  
GWDPETSNIREFHDLQLPPYSSPSNPNAATHFPAHLQPLFDASMQLREPLFQVCRDLSTKFRRIVIIHDTI

VGSIVQDVKLIPNAEAYVLVPTSAFQTSMGITKNLTEKPFQLDPDIPTNIPSNEGCTSEFLDFAYKQIELLD  
FQSGKLFNTRVIEDRYLELLERLPIYGNMKTFAIGPLNPVQIRRTSEKQRHECLEWLDKQEENSVIYVSF  
GSTTAMTDEQITELAKGLEQSGQKFIWVLRKADKGDIFMGDEEGRPQQPEGYEERVKDWGMVVRYWA  
PQLEILGHPSTGGFMSHCGWNSCIESISMGVPVVAWPMHSDQPRNATLLTEVLRIGLLIKDCVHLAELVT  
SDTIEDAVRRLMTSQEGEEMKKKAIEKLGEAVRASVAEGGASRLEMDSFIAHTR

>HU09G01875.1-W

ATGGAAAGCCAGAGTTGCTGCCAAAATGGTATCCAGAAGGGCCAAAATCTGCTGAAGTAGCTGTGG  
TCATGGTGCCCTTCCTAGCCCAAGGCCATCTCAACCAGTTCCTCCATCTCTCTCATCATCTCGTAGCCT  
CCTATGGCATAACCAGTTCACTACGCTGGGTCTGCCATCCACAACCGCCAAGCCAAGCTACGGTTCCAT  
GGTTGGGACCCGGAACCTTCCAACAGAATTGAGTTCCACGACCTACAGCTCCCTCCTTACAGCTCAC  
CCTCTCCAAACCCAAATGCAGCTACACATTTCCCTGCGCACCTCCAGCCTCTTTTCGATGCTTCTATGC  
AACTCCGCGAACCCCTTTTCCAAGTCTGCCGAGACCTCTCGACCAAGTTCAGGAGAATTGTCATAATT  
CATGATACCATAGTAGGTTCAATTGTTCAAGATGTAAACTCATCCCAAATGCCGAGGCTTACGTGCTT  
GTTCCAACCTCGGCTTTTCAAACATCTATGGGCATCACGAAAAATCTTACTGAAAAGCCCTTTCAGCT  
TGACCCTGATATCCCAACAAACATTCCCTCCAATGAAGGCTGCTTCACCTCAGAGTTCTTAGACTTCG  
CATATAAACAAATAGAGCTCCTGGACTTCCAATCTGGAAAATGTTCAATACATGCAGGGTTATAGAA  
GATAGATATTTGGAGCTACTGGAAAGGCTACCAATTTATGGAAACATGAAAACCTTCGCCATTGGACC  
TCTTAATCCAGTGCAAATCAGAAGGACAAGTGAGAAGCAACGACATGAATGTCTAGAATGGCTAGAT  
AAACAAGAGGAGAATTCTGTGATATATGTCTCCTTCGGATCGACAACAGCGATGACTGATGAGCAGAT  
CACAGAGTTGGCGAAAGGGTTGGAACAAAGCGGGCAGAAGTTTATATGGGTGCTTAGAAAAGCTGAT  
AAAGGCGACATTTTATGGGAGATGAAGAGGGAAGGCCTCAGCAGCCAGAAGGGTATGAAGAGAGG  
GTAAAGGACTGGGGAATGGTGGTGAGATACTGGGCACCACAGCTGGAAATTCTCGGTCACCCATCAA  
CAGGTGGGTTCATGAGTCACTGTGGGTGGAATTCATGCATAGAGAGTATCAGCATGGGTGTACCAGTT  
GTGGCATGGCCGATGCACTCTGACCAGCCTAGGAATGCCACTTTGTTGACAGAAGTGCTAAGAATTGG  
ATTATTGATCAAGGATTGCGTGCATCTAGCTGAGCTGGTGACATCAGATACCATAGAGGATGCTGTGAG  
ACGACTGATGACATCACAGGAAGGAGAGGAGATGAAGAAAAAGGCAGAAAAACTAGGCGAGGCTG  
TTCGAGCTTCAGTCGCTGAAGGTGGTGCTTCTCGCTTGGAATGGATTCTTTCATTGCTCATATTACCA  
GATAA

MESQSCCQNGIQKGQKSAEVAVVMVPFLAQGHLNQFLHLSHHLVASYGIPVHYAGSAIHNQAKLRFHG  
WDPETSNRIEFHDLQLPPYSSPSNPNAATHFPAHLQPLFDASMQLREPLFQVCRDLSTKFRRIVIIHDTIVG  
SIVQDVKLIPNAEAYVLVPTSAFQTSMGITKNLTEKPFQLDPDIPTNIPSNEGCTSEFLDFAYKQIELLD  
FQSGKLFNTRVIEDRYLELLERLPIYGNMKTFAIGPLNPVQIRRTSEKQRHECLEWLDKQEENSVIYVSF  
GSTTAMTDEQITELAKGLEQSGQKFIWVLRKADKGDIFMGDEEGRPQQPEGYEERVKDWGMVVRYWAPQLEI  
LGHPSTGGFMSHCGWNSCIESISMGVPVVAWPMHSDQPRNATLLTEVLRIGLLIKDCVHLAELVTS  
SDTIEDAVRRLMTSQEGEEMKKKAIEKLGEAVRASVAEGGASRLEMDSFIAHTR



## UGT79B6

>HU03G02206.1-R

ATGGACCTGACCCACCCTGAAGTTGAGCTGATTATAATGAGCCTGGAGTCCAAGCCAAACCTCCTCTT  
CTACGACGTGGCTCATTGGATCCCCGAGATAGCCTCCAAGCTGTCTGGGGTCCAAACCGTCTGCTACA  
AAGTCGTCTGTGCTGCCTCCCTCGCCATCGCCATCGTCCCAGCCCCGGGTCTGAGCCGGGACAAAAC  
CGTCACCGACTCGGACCTGGCCGAACCCCCGAGGTTACCCCTCAAACAACGTTGTTTTACGGGGA  
GCAGAGTGGCAGAACCTCCTCTTTATTGGGCTGGAGTTTGGCTCCGGCCTCACCTTCTATGAGCGGAT  
TACAAGGGCAATACGCTCCTGCGATGCGATAGCATTCCGAACGTGCAGAGAAATCGAAGGGAGCTTC  
TGTGACTACATG**GCAAGCCAATACAACAAGCCGGTCTTTCTTACCGGTCCTGTTTTAGCAGAAGTGGA**  
**TAGTACTACAACAACGCCACTGGACCAGAAATGGGCCAATTGGCTAAACCAGTTTGGGTCCCGTTCC**  
**GTGGTGTTCG**GCATTTCGGGAGCCAGTTTGCCTCGAGAAGGAGCAGCTGAAAGAGCTACTGCTTG  
GGTTTGAGATGGCAGGGAAGCCATTCTTCATGGCTGTGAAGCCCCCTTAGAGTGCGCCTCAATCGGG  
GAGGCACTGCCAAAGGGGTTTCGAGGAGCGGGTCCGAGCGAGAGGAGTGGTCTGCGGGTCATGGGTA  
CAGCAACCACAGATTCTTGCGCACCCGTCGGGCGGTTGCTTCGTGAACCACTGTGGGTTCGGTTCGAT  
GTGGGAGTCGTTAATGAGTGAGAGTCAAATAGTGTGGTGCCGCAGCTTGGGGACCAGATTTTGAAC  
GCTAGGATAATTGCTGGGGAGATGAAGGTGGCTGTGGAGGTGGAGAGGGGAGAGAATGGATGGGTCT  
CTAAGGAGAATCTATGCAAAGCTATAAATTCAGTGATGGATGAAGGGAGTGAGGTGGGGGAGATGGT  
TAAGAAGAATCATGCAAAGTGGAGAGAGGTTTTTGTAGGAATGACTTTATGGGTGGTTACATTGATA  
ATTTTGTTAAGGATTGGAAATGCTTGTTGGTGGGCATTAG

MDLTHPEVELIIMSLESKPNNLFYDVAHWIPEIASKLSGVQTVCYKVVCAASLAIAIVPARGLSRDKTVTD  
SDLAELPRGYPSNNVLRGAEWQNLLFIGLEFGSGLTFYERITRAIRSCDAIAFRTCREIEGSFCDYMASQY  
NKPVFLTGPVLAEVDSTTTTPLDQKWANWLNQFGSRSVVFCAFGSQFALEKEQLKELLLGFEMAGKPF  
MAVKPPLECASIGEALPKGFEERVRRARGVVCGSWVQQPQILAHPSGGCFVNHCGFGSMWESLMSSEQIV  
LVPQLGDQILNARIAGEMKVAVEVERGENGWVSKENLCKAINSVMDEGSEVGEMVKKNHAKWREVFV  
RNDFMGGYIDNFKDLEMLVGGH

>HU03G02206.1-W

ATGGACCTGACCCGCCCTGAAGTTGAGCTGATTATAATGAGCCTGGAGTCCAAGCCAAACCTCCTCTT  
CTACGACATGGCCCATTTGGATCCCCCAGATAGCCTCTAAGCTGTCCAGGGTCCAAACCGTTTGCTACA  
AAGTCGTCTGTGCTGCCTCCCTCGCCATCGCCGTCGTCCCAGCTCGGGGTCTGACACGGGACAAACC  
CGTCACTGAGTCGGACCTTGCCAGCTCCCCAAGGCTATCCCTCAAACAACGTCGTTTTACGGGGA  
GCAGAGTGGCAGAACCTCCTCTTCATTGGGCTGGAGTTTGGATCCGGGCTCACCTTCTGTGAGCGGAT  
TACAAGGGCTATACGCTCCTGCGATGCGATAGCATTACGAACGTGCAGAGAAATCGAAGGGGGCTTCT  
GTGACTACATG**GCAAGCCAATACAACAAGCCGGTCTTTCTTACCGGTCCTGTTTTAGCAGAAGTGAT**  
**AGTACTACAACAACGCCACTGGACCAGAAATGGGCGAATTGGCTAAACCAGTTTGGGTCTCGTTCGG**  
**TGGTGTTCG**CGTTCGGGAGCCAGTTTGTACTCGAGAAGGAGCAGCTGAAAGAGCTACTGCTTGG  
GTTTGAAATGGCAGGGAAACCATTCTTCGTGGCTGTGAAGCCCCCTTAGAGTGCGCCTCAATCGGG

GAGGCACTGCCAAAAGGGTTCGAGGAGCGGGTCCGAGCGAGAGGAGTGGTCTGCGGGTCATGGGTA  
CAGCAACCACAGATTCTTGCGCACCCGTCGGTCGGGTGCTTCGTGAACCACTGTGGGTTCGGTTCGAT  
GTGGGAGTCGTTAATGAGTGAGAGTCAGATAGTGTGGTGCCGCAGCTTGGGGACCAGATTTTGAAC  
GCTAGGATAATTGCTGGGGAGATGAAGGTGGCTGTGGAGGTGGAGAGGGGAGAGAATGGATGGGTCT  
CCAAGGAGAATCTGTGCAAAGCTATAAATTCAGTGATGGATGAAGGGAGTGAGGTGGGGGAGATGGT  
TAAGAAGAATCATGCAAAGTGGAGAGAGGTTTTTTGTTAGGAATGACTTTATGGGTGGTTACATTGATA  
ATTTTGTTAAGGATTGGAAATGCTTGTTGGAGGGCATTAG

MDLTRPEVELIIMSLESKPNNLFYDMAHWIPQIASKLSRVQTVCYKVVCAASLAIAVVPARGLTRDKPVTE  
SDLAQLPQGYPNNVLRGAEWQNLLFIGLEFGSGLTFCERITRAIRSCDAIALRTCRIEIEGGFCDYMASQ  
YNKPVFLTGPVLAEVDSTTTPLDQKWANWLNQFGSRSVVFCAFGSQFVLEKEQLKELLGFMAGKPF  
FVAVKPPLECASIGEALPKGFEERVRRGVVCGSWVQQPQILAHPSVGCFFVNHCGFGSMWESLMSESQIV  
LVPQLGDQILNARIAGEMKVAVEEVERGENGWVSKENLCKAINSVMDEGSEVGEMVKKNHAKWREVFV  
RNDFMGGYIDNFKDLEMLVGGH

>HU07G01550.1-R

ATGGGTAAACAGCTCCACATAGTGATGTTCCCATGGTTTTCGATGGGACACATGATCCCATTCCTACAA  
CTTGCGAACAAGCTTGCAGAAAGAGGTCACAAAACAACCTTCCTACTACCCAAGAAAGCCATCCTAC  
ATTTAGCCTCCTTAAACCTCCATACATCCCTCATCAGCCTCCACCCAATCACTGTCCCTCACGTGGACC  
CTCTCCCTCCTGGCATTGAGACTGCCTCCGACATTCCCATCCACCTCAACAACCACTCGCCACAGCC  
ATGGACCTGACCCGCCCAGAAGTTGAGCTGATTATAATGAGCCTGGAGTCCAAGCCAAACCTCCTCTT  
CTACGATGTGGCTCATTGGATCCCCGAGATAGCCTCCAAGCTGTCTGGGGTCCAAACCGTCTGCTACA  
AAGTCGTCTGTGCTGCCTCCCTCGCCATCGCCATCGTCCCAGCCCGGGTCTGAGCCGGGACAAAAC  
CGTCACCGACTCGGACCTGGCCGAACCTCCCCGAGGTTACCCCTCAAACAACGTTGTTTTACGGGGA  
GCAGAGTGGCAGAACCTCCTCTTTATTGGGCTGGAGTTTGGCTCCGGCCTCACCTTCTATGAGCGGAT  
TACAAGGGCAATACGCTCCTGCGATGCGATAGCATTCCGAACGTGCAGAGAAATCGAAGGGAGCTTC  
TGTGACTACATGGCAAGCCAATACAACAAGCCGGTTTTTCTTACCGGTCCTGTTTTGCCTGAACTGGA  
TAGTACTACAACAACGCCACTTGACCAGAAATGGGCCGATTGGCTGGATCAGTTCACGTCCCGTTCGG  
TGGTGTCTGCGCGTTTCGGGAGCCAGTTTGTACTGGAGAAGGAGCAGCTGAAAGAGCTACTGCTTGG  
GTTTGAGATGGCAGGGAAGCCATTCTTCGTGGCTGTGAAACCCCTTCAGGGTGCGCCTCAATCGGG  
GAGGCACTGCCAGAAGGGTTCGAGGAGCAGGTCCGAGAGAGAGGAGTGGTCTGCGGGTCATGGGTA  
CAGCAACCACAGATTCTTGCGCACCCGTCGGTCGGGTGCTTCGTGAGCCACTGTGGGTTCGGTTCGAT  
GTGGGAGTCGTTGATGAGTGAGAGTCAGATAGTGTGGTGCCGCAGCTTGGGGACCAGATTTTGAAT  
GCCAGGATAATTGCTGGGGAGATGAAGGTGGCTGTGGAGGTGGAGAGGGAAGAGAACGGATGGGTC  
TCCAAGGAGAATCTGTGCAAAGCTATAAAGTCAGTGATGGATGAAGGGAGTGAGGTGGGGGAGATGG  
TTAAGAAGAATCATGCAAAGTGGAGAGGGGTTTTTTGTTAGGAATGACTTTATGGGTGGTTACATTGAT  
AATTTTGTTAAGGATTGGAAATGCTTGTTGGTGGGCATTAG

MGKQLHIVMFPWFAMGHMIPFLQLANKLAERGHKTTFLPKKAILHLASLNLHTSLISLHPITVPHVDPLP

PGIETASDIPIHLNNHLATAMDLTRPEVELIIMSLESKPNNLFYDVAHWIPEIASKLSGVQTVCYKVVCAAS  
LAIAIVPARGLSRDKTVTSDLAELPRGYPSNNVLRGAEWQNLLFIGLEFGSGLTFYERITRAIRSCDAIA  
FRTCRIEIEGSFCDYMASQYNKPVFLTGPVLPELDSTTTTPLDQKWADWLDQFTSRSVVFCAFGSQFVLEK  
EQLKELLLGFEMAGKPFVAVKPPSGCASIGEALPEGFEEQVRERGVVCGSWVQQPQILAHPSVGCFFVSH  
CGFGSMWESLMSESQIVLVPQLGDQILNARIAGEMKVAVEVEREENGWVSKENLCKAIKSVMDEGSEV  
GEMVKKNHAKWRGVFVRNDFMGGYIDNFVKDLEMLVGGH

>HU07G01550.1-W

ATGGGTAAACAGCTCCACATAGTGATGTTCCCATGGTTTGCGATGGGACACATGATCCCATTCTCTACAA  
CTTGCGAACAAGCTTGCAGAAAGAGGTCACAAAACAACCTTCCTACTACCCAAGAAAGCCATCCTAC  
ATTTAGCCTCCTTAAACCTCCATACATCCCTCATCAGCCTCCACCCAATCACTGTCCCTCACGTGGACC  
CTCTCCCTCCTGGCATTGAGACTGCCTCCGACATTCCCATCCACCTCAACAACCACCTCGCCACAGCC  
ATGGACCTGACCCGCCAGAAGTTGAGCTGATTATAATGAGCCTGGAGTCCAAGCCAAACCTCCTCTT  
CTACGATGTGGCTCATTGGATCCCCGAGATAGCCTCCAAGCTGTCTGGGGTCCAAACCGTCTGCTACA  
AAGTCGTCTGTGCTGCCTCCCTCGCCATCGCCATCGTCCCAGCCCGGGTCTGAGCCGGGACAAAAC  
CGTCACCGACTCGGACCTGGCCGAACCCCCGAGGTTACCCCTCAAACAACGTTGTTTTACGGGGA  
GCAGAGTGGCAGAACCTCCTCTTTATTGGGCTGGAGTTTGGCTCCGGCCTCACCTTCTATGAGCGGAT  
TACAAGGGCAATACGCTCCTGCGATGCGATAGCATTCCGAACGTGCAGAGAAATCGAAGGGAGCTTC  
TGTGACTACATGGCAAGCCAATAACAAGCCGGTTTTTCTTACCGGTCTGTTTTGCCTGAACTGGA  
TAGTACTACAACAACGCCACTTGACCAGAAATGGGCCGATTGGCTGGATCAGTTCACGTCCCGTTTCGG  
TGGTGTCTGCGCGTTTCGGGAGCCAGTTTGTACTGGAGAAGGAGCAGCTGAAAGAGCTACTGCTTGG  
GTTTGAGATGGCAGGGAAGCCATTCTTCGTGGCTGTGAAACCCCTTCAGGGTGCGCCTCAATCGGG  
GAGGCACTGCCAGAAGGGTTCGAGGAGCAGGTCCGAGAGAGAGGAGTGGTCTGCGGGTTCATGGGTA  
CAGCAACCACAGATTCTTGCGCACCCGTCGGTCGGGTGCTTCGTGAGCCACTGTGGGTTCGGTTCGAT  
GTGGGAGTCGTTGATGAGTGAGAGTCAGATAGTGTGGTGCCGCAGCTTGGGGACCAGATTTTGAAT  
GCCAGGATAATTGCTGGGGAGATGAAGGTGGCTGTGGAGGTGGAGAGGGAAGAGAACGGATGGGTC  
TCCAAGGAGAATCTGTGCAAAGCTATAAAGTCAGTGATGGATGAAGGGAGTGAGGTGGGGGAGATGG  
TTAAGAAGAATCATGCAAAGTGAGAGGGGTTTTTGTAGGAATGACTTTATGGGTGGTTACATTGAT  
AATTTTGTAAAGGATTTGGAAATGCTTGTTGGTGGGCATTAG

MGKQLHIVMFPWFAMGHMIPFLQLANKLAERGHKTTFLPKKAILHLASLNLHTSLISLHPITVPHVDLP  
PGIETASDIPIHLNNHLATAMDLTRPEVELIIMSLESKPNNLFYDVAHWIPEIASKLSGVQTVCYKVVCAAS  
LAIAIVPARGLSRDKTVTSDLAELPRGYPSNNVLRGAEWQNLLFIGLEFGSGLTFYERITRAIRSCDAIA  
FRTCRIEIEGSFCDYMASQYNKPVFLTGPVLPELDSTTTTPLDQKWADWLDQFTSRSVVFCAFGSQFVLEK  
EQLKELLLGFEMAGKPFVAVKPPSGCASIGEALPEGFEEQVRERGVVCGSWVQQPQILAHPSVGCFFVSH  
CGFGSMWESLMSESQIVLVPQLGDQILNARIAGEMKVAVEVEREENGWVSKENLCKAIKSVMDEGSEV  
GEMVKKNHAKWRGVFVRNDFMGGYIDNFVKDLEMLVGGH

>HU09G01034.1-R

ATGGGGGAACAACCTCCACATCGTGATGTACCCGTGGCTGCATTTGGGTCACATAATCCCATATCTTCAC  
TTCGCAAACAAGCTTGCTGAGAGATCAGGCCACAAAATTAGGACCACCTCTTACTCCCCAAGAAGG  
CGGTCCCCCAACTCAACCACATGAATCTCCACCCTTCTCTGATCTCCCTCCACCCAATCACCATCCCCC  
ATGTGGACCCCCCTCCCTCTCGGCTCCGAGACCGCCTCCGATGTTCCCCCCCACCTGGCCCCCTCACCTC  
GCCACCGCCATGGACCTGACTAGACCCGAAGTCGAGTCCACGATATTGGGCCTCCAGCCCAGGGCCA  
CCCTCATCTTTTACGATCTAGCCTATTGGGTCAACGAAATAGCATCCGAGCTCGGAATCAAGACCGTCT  
GCTACGTCCCCGTTTGCGCGGCTTGTCAGCCATGGGTATTGCTATGCGACCAATCCAAGACGAGGCC  
GTACCAGAGCTCGCCCCGGAGTACCCTCAACCGACGTCGTCTTAAGGGGGCCGGCCGAGTGGCGGA  
AGATATCATTGAGAACGTCACAGTTCGGCAGCGGGCTCAAGTTTAGTGAGCGGACCGGACGGTCCAA  
GACATTGTGTGACGCCATTGGCCTCCGAACCTTGCAGAGAGATTGAAGGGGCTTTCTGCGACTACGTAA  
GTAGCCACTTTGGCAAGCCCCCTTCTCCTCTCGGGCCCAGTCCTGCCCCGAGCCTAATACGGCCACGCCG  
CTCGACCCCGAATGGGCCTCGTGGCTGGGCCGATTTCGGGCTTGGCTCGGTGGTGTCTGCACCTTAGG  
GAGTCAGATGACCCTGGAGAGGGAGCAGTTCCAGGAACTGCTCCTGGGTTTTGAAATGACCAAAATG  
CCCTTTCTCGTCGTCCTGAAGCCTCCAACCTGGGTGCTCCTCCATCGATGAGGCCCTCCCGGAGGGGTT  
CCAGGAGAGGGTGGGAGACAGAGGGGTCGTTTCATGGCGGGTGGGTGCAACAACCACAGATACTGTC  
GCACCCATCGGTGGGTTGCTTCGTGAGCCATTGTGGGCTCGGGGCGCTGTGGGAGTCGCTCATGTCTG  
AGTGTCAGATAGTGCTCCTACCGCAGGCTTGGGACCATATTGTGAATGCTAGGATTATGGCAGCCCAG  
ATGAAGGTGGCTGTGGAGGTAGAGAAGAGGGAAGAGGATGGGTGGGTTTTCAAAGGAGAGTTTGTGT  
AAAGCCATCAAAGCCGTCATGGATGACGAGAGTGAGGTCGGGTGCTTGGTCAAGAAGAACCACGCA  
AAATGGAGAGAGGTTATCACTCGGCAAGGGTTTTATGGATGGCTATGTTGATAATTTTCATCAAGGATTA  
GAAAGACTTATTTCTACTGCTTGA

MGEQLHIVMYPWLHLGHIIPYLHFANKLAERSGHKIRTTLLLPKKAVPQLNHMNLHPSLISLHPITIPHVDP  
LPLGSETASDVPPHLAPHLATAMDLTRPEVESTILGLQPRATLIFYDLAYWVNEIASELGIKTVCYVPVCAA  
CQAMGIAMRPIQDEAVPELAPEYPSTDVVLRGPAEWRKISLRSTSQFGSGLKFSERTGRSKTLCDAIGLRCTC  
REIEGAFCDYVSSHFGKPLLLSGPVLPEPNTATPLDPEWASWLGRFGLGSVVFCTLGSQMTLREQFQELL  
LGFEMTKMPFLVLVKPPTGCSSIDEALPEGFQERVGDRGVVHGGWVQQPQILSHPSVGCFSVSHCGLGAL  
WESLMSECQIVLLPQAWDHIVNARIMAAQMKVAVEVEKREEDGWVSKESLCKAIKAVMDDESEVGCLV  
KKNHAKWREVITRQGFMDGYVDNFIKDLERLISTA

>HU09G01034.1-W

ATGGGGGAACAACCTCCACATCGTGATGTACCCGTGGCTGCATTTGGGTCACATAATCCCATATCTTCAC  
TTCGCAAACAAGCTTGCCGAGAGATCAGGCCACAAAATTAGGACCACCTCTTACTCCCCAAGAAGG  
CGGTCCCCCAACTCAACCACATGAATCTCCACCCTTCTCTGATCTCCCTCCACCCAATCACCATCCCCC  
ATGTGGACCCCCCTCCCTCTCGGCTCCGAGACCGCCTCCGATGTTCCCCCCCACCTGGCCCCCTCACCTC  
GCCACCGCCATGGACCTGACTCGGCCTGAAGTCGAGTCCACGATATTGGGCCTCCAGCCCAGGGCCA  
CCCTCATCTTTTACGACATGGCCTATTGGGTCAACGAAATAGCGTCCGAGCTCGGAATCAAGACCGTC  
TGCTACATGCCCGTTTGCGCGGCTTGTCAGCCATGGCTATTGCTATGCGACCAACCCAAGACGAGGC  
CGTACCAGAGCTCGCCCCGGAGTACCCTTCAACCGACGTCGTCTTACGGGGGGCCGGCCGAGTGGCGG

AAGATATCATTGAGAAAGTCACAGTTCGGCAGCGGGCTCAAGTTTAGTGAGCGGACCAGACGGTCCA  
AGACATTGTGTGACGCCATTGGCCTCCGAACGTGTAGAGAGATTGAAGGGGCTTTCTGCGACTACGTA  
AGTAGCCACTTTGGCAAGCCCCCTTCTCCTCTCGGGCCCAGTCCTGCCCCGAGCCTAATACGGCCACGCC  
GCTCGACCCCGAATGGGCCGCGTGGCTGGGCCGATTCTGGGCCTGGCTCGGTGGTGTCTGCACCTTA  
GGGAGTCAGATGACCCTGGAGAGAGAGCAGTTCCAGGAACTGCTCCTGGGTTTTGAAATGACCAAA  
ATACCCCTTCTCGTCGTCCTGAAGCCTCCAACCTGGGTGCTCCTCCATCGATGAGGCCCTCCCGGAGGG  
GTTCCAGGAGAGGGTGGGAGACAGAGGGGTCGTTTCATGGCGGGTGGGTGCAACAACCACAGATACT  
GTCGCACCCATCGGTGGGTTGCTTCGTGAGCCATTGTGGGCTCGGGGCGCTGTGGGAGTCGCTCATGT  
CTGAGTGTGAGATAGTGCTCCTACCGCAGGCTTGGGACCATATTATGAATGCTAGGATTATGGCAGCCC  
AGATGAAGGTGGCTGTGGAGGTAGAGAAGAGGGAAGAGGATGGGTGGGTTTCAAAGGAGAGTTTTT  
GTAAAGCCATCAAAGCCGTCATGGATGAAGAGAGTGAGGTGGGGTGCTTGGTCAAGAAGAACCACG  
CAAAATGGAGAGAGGTTATCACTCGGCAAGGGTTTATGGATGGCTATGTTGATAATTCATCAAGGATT  
TAGAAAGACTTGTTACTGATGCTTGA

MGEQLHIVMYPWLHLGHIIPYLHFANKLAERSGHKIRTTLLLPKKAVPQLNHMNLHPSLISLHPITIPHVDP  
LPLGSETASDVPPHLAPHLATAMDLTRPEVESTILGLQPRATLIFYDMAYWVNEIASSELGIKTVCYMPVCA  
ACQAMAIAMRPTQDEAVPELAPEYPSTDVVLRGPAEWRKISLRKSQFGSGLKFSERTRRSKTLCDAILRT  
CREIEGAFCDYVSSHFGKPLLLSGPVLPEPNTATPLDPEWAAWLGRFGPGSVVFCTLGSQMTLEREQFQEL  
LLGFEMTKIPFLVVLKPPTGCSSIDEALPEGFQERVGDRGVVHGGWVQQPQILSHPSVGC FVSHCGLGAL  
WESLMSECQIVLLPQAWDHIMNARIMAAQMKVAVEVEKREEDGWVSKESFCKAIKAVMDEESEVGCLV  
KKNHAKWREVITRQGFMDGYVDNFIKDLERLVTDA

#### UGT79B30

>HU04G00198.1-R

ATGGCCCAGGCTAAAGAAAAGCTTAATTTGCACATAGCCATGCACCCATGGTTCGCCATGAGCCATATT  
ACTAATTTTCTAGGGCTAGCCAACAAGTTCGCTGAGAAGGGTCACAAAATAAGCTTCTTCCTACCACC  
CAAAACCCAGCCCAAGCTAGCCTCCTTCAACCACCATCCCCACCTCATCACCTTCATCCCGGTCCCAG  
TTCCCCGGGTGCGACGGGCTGCCCCGACGGGGCCGAGACCACCCACGACGTGCCAGCCCTGGCCCCGGC  
CCCTCCTCATGGCCGCCATGGACCTGACCCGGGACGTCATCGACTCCCACCTGGCCCCGACTCAGGCC  
CGACGTAGTCTTCTTCGACTTCGCCGAGTGGCTACCCGGGCTGGCCAGAAAACACGGGGCCAAGTCC  
GTTGCTTTGCCACCACGTTCTGTGTTACGGCTGCTTACCTCCTCGCCGGGGCCGAGGAATTTGCCCGA  
TGGCTGCCCCCTAAGGAGGAGGACCTCATGCACCCACCACCGGGCTTCCCAGCCCAAGGTATCGGG  
CTGGCGGGCCCATGAGGCCCCGGGTCATAGTCAAGGCAATAAGAATGGAATTTGGTGGAGGGATGAATTT  
GTTGAGAGGTCAAAAATAGCTTTTGAGGAATCTGATGCTATGGGGTTCAAGACTTGTAGGGAGATGG  
AAGGTCCTTTGTTGAGTTTGTTGCAAAGCATTCGGACAAGCGTTTGCTCCTGGCTGGGCCAATGCTC  
CCGAGCCCCCCCCGATTCGAGGCTCGACGAGGACATCGATGCGTGGCTCAAGGGGTTTCGGTCATGGTG  
GCGTGGTCTACTGCGCCCTTGGGAGTGAATCGGATCTTCAGCAGGACCAGTTTCAAGAGCTTGCTCTT

GGGCTTGAGCTAACAGGTCGGCCATTCTTGGCAGCCCTCAAGCCCCAAGAAATCACCAAACCATAG  
AGTCAGCATTGCCAAAGGGGTTCTTAGAGAGAAACAAAAGATCGAGGCATGATTCATGGGGGATGGGT  
GCAACAACAACCTGATCCTGCACCATCCTTCAGTAGGGTGTTCGTGACACATTGTGGAGCCTCGTCCT  
TGTTTGAAGGCATGTGAGTGAGTGCCAACTAGTCATGTTGCCCAACAAATTGACCAGTTCACCAAT  
GCAAGGGTGATGAGCTCATACTTTAAAGTTGGAGTTGAGGTTGAGAAGAGAGACCATGATGGCTTCT  
TACTAGAGAGGCAATTTGCAAAGCAGTTAGTTTGGTGATGGAGGAAGAAAGCGAGGTGGGTAAAG  
AAGTGAGAGCCAACCATGCTAAATGGAGGGAGATCTTGTCCAAGGAGGGCCTTGAAGATTCTTATATT  
ACCGAACTTGTTTCGGGATTTACAAGGTTTACTTGCA

MAQAKEKLNLIAMHPWFAMSHITNFLGLANKFAEKGHKISFFLPPKTQPKLASFNHHPHLITFIPVPVPR  
VDGLPDGAETHDVPALARPLLMAAMDLTRDVIDSHLARLRPDVVFDFAEWLPGLARKHGAHSVRFAT  
TFLFTAAYLLAGPRNLPDGCPPKEEDLMHPPPGFPAQIGIGLAAHEARVIVKAIRMEFGGGMNLFERSKIAF  
EESDAMGFKTCREMEGPFVEFVAKHSDKRLLLAGPMLPSPDSDLDEIDAWLKGFHGGVVYCALGSE  
SDLQQDQFQELALGLELTGRPFLAALKPPRNHQITIESALPKGFLERTKDRGMIHGGWVQQQLILHHPVSG  
CFVTHCGASSLFEGMSSECQLVMLPQQIDQFTNARVMSSYFKVGVVEVEKRDHDGFFTREAICKAVSLVME  
EESEVGKEVRANHAKWREILSKEGLEDSYITELVRDLQGLLA

>HU04G00198.1-W

ATGGCCCAGGCTAAAGAAAAGCTTAATTTGCACATAGCCATGCACCCATGGTTCGCCATGAGCCATATT  
ACTAGTTTTCTAGGGCTAGCCAACAAGTTCGCTGAGAAGGGTCACAAAATAAGCTTCTTCCTACCACC  
CAAAACCCAGCCCAAGCTAGCCTCCTTCAACCACCATCCCCACCTCATCACCTTCATCCCGGTCCCAG  
TTCCCCGGGTGACGGGCTGCCCCGACGGGGCCGAGACCACCCACGACGTGCCAGCCCTGGCCCCGGC  
CCCTCCTCATGGCCGCCATGGACCTGACCCGGGACGTCATCGACTCCCACCTGGCCCGACTCAAGCC  
CGACGTAGTCTTCTTCGACTTCGCCGAGTGGCTACCCGGGCTGGCCAGAAAACACGGGGCCAAGTCC  
GTTTCGCTTTGCCACCACGTTCTGTGTTACGGCTGCTTACCTCCTCGCCGGGCGGAGGAATTTGCCCGA  
TGGCTGCCCCCTAAGGAGGAGGACCTCATGCACCCACCACCGGGCTTCCCAGCCCAAGGTATCGGG  
CTGGCGGGCCATGAGGCCCCGGGTCATAGTCAAGGCAATAAGCATGGAATTTGGTGGAGGGATGAATTT  
GTTTCGAGAGGTCAAAAATAGCTTTTGAGGAATCTGATGCTATGGGGTTCAAGACTTGTAGGGAGATGG  
AAGGTCCCTTTGTTGAGTTTGTGCAAAGCATTTCGGACAAGCGTTTGCTCCTGGCTGGGCCAATGCTC  
CCGAGCCCCCCCCGATTCGAGGCTCAACGAGGACATCGATGCGTGGCTCAAGGGGTTTCGGTCATGGTG  
GCGTGCTTACTGCGCCCTTGGGAGTGAATCGGATCTTCAGCAGGACCAGTTTCAAGAGCTTGCTCTT  
GGGCTTGAGCTAACAGGTCGGCCATTCTTGGCAGCCCTCAAGCCCCAAGAAATCACCAAACAATAG  
AGTCAGCATTGCCAAAGGGGTTCTTAGAGAGAAACAAAAGATCGAGGCATGATTCATGGGGGATGGGT  
GCAACAACAACCTGATCCTGCACCATCCTTCAGTAGGGTGTTCGTGACACATTGTGGAGCCTCGTCCT  
TGTTTGAAGGCATGTGAGTGAGTGCCAACTAGTCATGTTGCCCAACAAATTGACCAGTTCACCAAT  
GCAAGGGTGATGAGCTCATACTTTAAAGTTGGAGTTGAGGTTGAGAAGAGAGACCATGATGGCTTCT  
TACTAGAGAGGCAATTTCCAAAGCAGTTAGTTTGGTGATGGAGGAAGAAAGCGAGGTGGGTAAAG  
AAGTGAGAGCCAACCATGCTAAATGGAGGGAGATCTTGTCCAAGGAGGGCCTTGAAGATTCTTATATT  
ACCGAACTTGTTTCGGGATTTACAAGCCTCCCTGAACCACCACCCCCACCGCATCACCTTTATCCCGGT

CCCGGTCCCCGGGTCGACGGCCTACCGGAATGGGCCGAGACCACGAATGATGTGCCCCCTGAAGCC  
CGACCACTCATCATGATCGCCATGGACTTGACCCGGGACACCATTGACTCTCATCTGGCCCAACTCAG  
GCCCCAACTCATCATCTTTGACTTCGCGCCTTGGGTACCTGGGCTGGCCCCGAAAGTACCGGGCCAAGT  
CCGTTTTCTATTGCGCGTCGTTCTTGATGCCTGCCGTTTACTTCTTCCCCCAGGCCCGGAACAAGCCCA  
TCAACTATGCCCTCACGGAGGAGGATCTAGTCCACCCGCCTCCGGGTTTTCTGACGGAATCCGGCTT  
GCGGCCCCACGAGGCCCGGGCCATGGCCTATGCATTGAAGTTGGATTTCGGAGGAGGGATGACATGGG  
CCCAAAGGTCCATGATGGCCTATAAAGAATGTGATGCTATTGCCATCAAGACTTGTAGGGAGATGGAA  
GGTCCCTTGTGTGAGTTTGCCGCAATGCTCGTTAACAAGCCAGTGTTCTAGCCGGGCCATTGCTTCC  
GGGCCATCCGACTTCCCGCCTCGATGAGGACATAGATGGGTGGTTGAAGGGGTTCTGGTTCGTGGCACC  
GTGATCTACTGTGCCCTTGGGAGTGAATGCACTCTTGAAAAGGACCAGTTTCAGGAGCTTGTCTTGG  
ACTTGAGCTAACAGGTAAGCCATTTTTGGCAGCCCTGAAGCCCCCAATAAATTGAAAACAATCGAGT  
CAGCATTGCCAGAAGGGTTCCTAGAAAGAACAAGAGACAGAGGTATGATTCACGACGGATGGGTGCA  
ACAACAGTTAATCTTGAACCACCCCTCAGTAGGGTGTTCGTGACACATAGTGGATCTGGGTCTTTTT  
CGGAGGCCATAATAAGCAAGTGTCAAATGGTCTTGCTTCCTCAAGCAGTCGACCAGTTCCTCGTCGCG  
AGGTTGATGAGTTGCTACATGAAAATTGGAGTTGAGGTCGAGAAGAGAGACTATGATGGCTTCTTCAC  
TAGAGAGGCCGTTTCGCAAAGCGATCAATTTAGTGATGGAGGAAGAGAGCGAGGTGGGTCAAGAAGT  
GAGAGCCAACCATGCTAAATGGAGGGAGCTCTTGTCTAAGGAAGGCCTTGAAGAATACTATATTTCCC  
AACTTGTTCAAGGTTTACATGGTTTACTTGGACCTAAGTAA

MAQAKEKLNHIAHPWFAMSHITSFLGLANKFAEKGHKISFFLPKTPQPKLASFNHHPHLITFIPVPVPR  
VDGLPDGAETTHDVPALARPLLMAAMDLTRDVIDSHLARLKPDRVFFDFAEWLPGLARKHGAHSVRFAT  
TFLFTAAYLLAGPRNLPDGCPPKEEDLMHPPPGFPAQGIGLAAHEARVIVKAISMEFGGGMNLFERSKIAF  
EESDAMGFKTCREMEGPFVEFVAKHSDKRLLAGPMLPSPDPSRLNEDIDAWLKGFHGGVVYCALGSE  
SDLQQDQFQELALGLELTGRPFLAALKPPRNHQTIESALPKGFLERTKDRGMIHGGWVQQQLILHHPVSG  
CFVTHCGASSLFEGMSSECQLVMLPQQIDQFTNARVMSSYFKVGVEVEKRDHDGFFTREAIKAVSLVME  
EESEVGKEVRANHAKWREILSKEGLEDSYITELVRDLQASLNHHPHRITFIPVPVPRVDGLPEWAETTNDV  
PPEARPLIMIAMDLTRDITIDSHLAQLRPELIIFDFAPWVPGLARKYRAKSVFYCASFLMPAVYFFPQARNKP  
INYALTEEDLVHPPPGFPDGIRLAAHEARAMAYALKLDFGGGMTWAQRSMMAYKECDAIAIKTCREMEG  
PLCEFAAMLVNKPVFLAGPLLPGHPTSRLEDEDIDGWLKGFGRGTVIYCALGSECTLEKDQFQELVLGLELT  
GKPFLAALKPPINCKTIESALPEGFLERTRDRGMIHDGWVQQQLILNHPSVSGCFVTHSGSGSFSEAIISKQ  
MVLLPQAVDQFLVARLMSCYMKIGVEVEKRDYDGFFTREAVRKAINLVMEESEVGQEVANHAKWRE  
LLSKEGLEEYYISQLVQGLHGLLGPK

>HU10G01599.1-R

ATGTCAGAAAACAATCACAAACCTTTGCACATAGCCATGTTCCCATGGTTTGCTTTTCGGCCACATTACA  
TCTTTTCTCCACTTAGCCAACAACTAGCTGAACAAGGCCACAGAATCTCCTTCATCCTCCCTCCCAA  
AACTCAAGCCCCAAATGCTCTCTCATAACCACCACCCTCATCTCATTTTCGTTTCATCCCCATCACTCTCCC  
TCCTGTTGATGGGCTCCCCACTTGGGCCGAGACTACGGCCGATGTACCCGCCTCATCCCGGCCCTTAT  
CATGACCGCCATGGACCGGACCCAAGACATGATCGAGTCCCTGCTCTCGAGCCTTAATCTTGATTTCAT

TTTCTTCGACTTCACTGAGTGGGTACCGGGCCTGGCCAGAAAATACCGAGTCAATTCCGTGTTCTATG  
CCACCGTGTACGTGGTAACAGTTGCTTACTTGACCCCTCAGGC**AAGAAACCTCCCTGTCAATGGCCTT**  
**ATGGAGGAGAATTTGGCGGGTCCGCCACCTGGTTTTCCATGCCCATCTATAGGGCTCAGGGCCCATGA**  
**GGCCAATACATGGCGAATGCATCAGGGGTGAAATTTGGAGGGGAAATATCACTGCTCGAAAGGGCT**  
**GCAATCGCTTTCCGAGAGTGTGATGCC**CATGGGGATCAAGAGTTGTAGGGAAATGGAAGGGCCATATTG  
TGATTATGTTATTGAGCACTATGGCAAGCCTTTGCTTTTGGCTGGGCCAGTGGTGCCCAAACCTGCCGG  
ATTCTAAGCTAGATGAGCAGCTTGAGGCCTGGTTGAAGAGTTTTAGTCAAGGATGTATTGTGTATTGTG  
CACTTGGGAGTGAATGCTTTCTCAAAAAGGACCAGTTCCAAGAGCTAGTTTTGGGACTTGAGCTCAC  
AGGAATGCCCTTCTTGGCAGCTTTAAAGCTACCTATAGATTGTCCTACAATGGAGTCAGCATTACCCTA  
TGGCTTCACGGAGCGAACCAGGAAGGGCGATCATCCACGAGGGGTGGGTGCAGCAGCAGCTGAT  
CTTGAACCACCCTTCAGTTGGGTGCTTCGTGACTCACTGTGGAGCTGGATCCTTGTGAGAAGGTCTAG  
TAAGCCACTGCCAACTGGTGATGCTTCCTCAGGCAGTTGATCAGTTTCTGAACGCCAGGATGATGAGC  
CAGGACCTCAAGGTTGGCGTGGAGGTCGAGGAGAGGGAAGGTGGTTTGATTACTCGGGAGGCAGTT  
CGCGATGCGATACTGTTGGTGATGCAGGAGGGAAGTGCGATGGGGAGGGAGGTGCGGGAAAACCAT  
GCTAAGATGAGAGAGTTCTTGGTCAAAGGAGGGGTTGAGGACTCTTATATTAGTAGCTTTGTTCAGAG  
TCTGTATGACCTGAGGGGTTGA

MSENNHKPLHIAMFPWFAGHITSFLHLANKLAEQGHRSFILPPKTQAQMLSHNHHPHLISFIPITLPPVD  
GLPTWAETTADVPASSRPLIMTAMDRTQDMIESLLSSLNLDIFFDFTEWVPGLARKYRVNSVFYATVYVV  
TVAYLTPQARNLPVNLMEENLAGPPPGFPCPSIGLRAHEAQYMANASGVKFGGEISLLERAAIAFRECD  
AMGIKSCREMEGPYCDYVIEHYGKPLLLAGPVVPKLPDSKLDEQLEAWLKSFSQGCIVYCALGSECFLKK  
DQFQELVLGLELTGMPFLAALKLPIDCPTMESALPYGFTERTKGRAIIEGWVQQQLILNHPSVGCFTVHC  
GAGSLSEGLVSHCQLVMLPQAVDQFLNARMMSQDLKVGVEVEEREGLITREAVRDAILLVMQEGSAM  
GREVRENHAKMREFLVKGGVEDSYISSFVQSLYDLRG

>HU10G01599.1-W

ATGTCAGAAAACAATCACAAACCTTTGCACATAGCCATGTTCCCATGGTTTGCTTTCGGCCACATTACA  
TCTTTTCTCCACTTAGCCAACAACTAGCTGAACAAGGCCACAGAATCTCCTTCATCCTCCCTCCCAA  
AACTCAAGCCCAAATGCTCTCTCATAACCACCACCCTCATCTCATTTTCGTTTCATCCCATCACTCTCCC  
TCCTGTTGATGGGCTCCCCACTTGGGCCGAGACTACGGCCGATGTACCCGCCTCATCCCGGCCCTTAT  
CATGACCGCCATGGACCGGACCCAAGACATGATCGAGTCCCTGCTCTCGAGCCTTAATCTTGATTTTCAT  
TTTCTTCGACTTCACTGAGTGGGTACCGGGCCTGGCCAGAAAATACCGAGTCAATTCCGTGTTCTATG  
CCACCGTGTACGTGGTAACAGTTGCTTACTTGACCCCTCAGGC**AAGAAACCTCCCTGTCAATGGCCTT**  
**ATGGAGGAGAATTTGGCGGGTCCGCCACCTGGTTTTCCATGCCCATCTATAGGGCTCAGGGCCCATGA**  
**GGCCAATACATGGCGAATGCATCAGGGGTGAAATTTGGAGGGGAAATATCACTGCTCGAAAGGGCT**  
**GCAATCGCTTTCCGAGAGTGTGATGCC**CATGGGGATCAAGAGTTGTAGGGAAATGGAAGGGCCATATTG  
TGATTATGTTATTGAGCACTATGGCAAGCCTTTGCTTTTGGCTGGGCCAGTGGTGCCCAAACCTGCCGG  
ATTCTAAGCTAGATGAGCAGCTTGAGGCCTGGTTGAAGAGTTTTAGTCAAGGATGTATTGTGTATTGTG  
CACTTGGGAGTGAATGCTTTCTCAAAAAGGACCAGTTCCAAGAGCTAGTTTTGGGACTTGAGCTCAC



AGGAATGCCCTTCCTGGCAGCTTTAAAGCTACCTATAGATTGTCCTACAATGGAGTCAGCATTACCCTA  
TGGCTTCACGGAGCGAACCAAAGGAAGGGCGATCATCCACGAGGGGTGGGTGCAGCAGCAGCTGAT  
CTTGAACCACCCTTCAGTTGGGTGCTTCGTGACTCACTGTGGAGCTGGATCCTTGTGAGAAGGTCTAG  
TAAGCCACTGCCAACTGGTGATGCTTCCTCAGGCAGTTGATCAGTTTCTGAACGCCAGGATGATGAGC  
CAGGACCTCAAGGTTGGCGTGGAGGTCGAGGAGAGGGAAGGTGGTTTGATTACTCGGGAGGCAGTT  
CGCGATGCGATACTGTTGGTGATGCAGGAGGGAAGTGCGATGGGGAGGGAGGTGCGGGAAAACCAT  
GCTAAGATGAGAGAGTTCTTGGTCAAAGGAGGGGTTGAGGACTCTTATATTAGTAGCTTTGTTCAGAG  
TCTGTATGACCTGAGGGGTTGA

MSENNHKPLHIAMFPWFAGHITSFLHLANKLAEQGHRSFILPPKTQAQMLSHNHHPHLISFIPITLPPVD  
GLPTWAETTADVPASSRPLIMTAMDRTQDMIESLLSSLNLDFFDFTEWVPLARKYRVNSVFYATVYVV  
TVAYLTPQARNLPVNGLMEENLAGPPPGFPCPSIGLRAHEAQYMANASGVKFGGEISLLERAAIAFRECD  
AMGIKSCREMEGPYCDYVIEHYGKPLLLAGPVVPKLPDSKLDEQLEAWLKSFQGCIVYCALGSECFLKK  
DQFQELVLGLELTGMPFLAALKLPIDCPTMESALPYGFTERTKGRAIIEGWVQQQLILNHPSVGCFTVHC  
GAGSLSEGLVSHCQLVMLPQAVDQFLNARMMSQDLKVGVEVEEREGLITREAVRDAILLVMQEGSAM  
GREVRENHAKMREFLVKGGVEDSYISSFVQSLYDLRG

>HU07G01678.1-R

ATGGAAGTTACAAGAAATGGTGAAAATGCAACCAAATCAAGCTCCATGTAGTTATGTTTCCTTGGTT  
TGCATTTGGTCATATAAACCCATTTATCCAGCTATCCAACAAGCTCACCTCCCATGGCATTCAAATCTCT  
TTCTTGTCAATACCTGGCAACATTTCTCGGATCCAGTCATCCCTCGATCTGTCTCCTCCCAACCAAATC  
ATCCCTCTTACTATCCCTCCTATCGAAGGTCTGCCTCCTGATGTTGACAGCAGCTCTTTCTTACCACCA  
CAGGTGTACGAGCTTCTCAAGCTGGCACTTGACCAAATGCAACCCCAAGTGAAGTCCCTTTTAACCC  
AACTACATCCCGACATTGTTTTGTTTGACTTTGCACACCATTGGCTCCCTCCACTGGCATCCGAATTGG  
GTATCAAGTCTGCCAACTTCTGTGTCTTCTCTGCTGTTGCCACTGCATACCTTACTGTGCCTTCAAGAA  
TGCTGACCCAAATCAACCCCCACCTTTGAAGACATGAAGAAGCCTCCCCAGGCTTCCCTGAGAC  
CTCGCTTACCGGGATCAAAACATTCCAAGCTCAAGACTTTATGTATCTCTTCAAAAGCTTCTATGAAGG  
TCCCCCTGTTTTTGAGAGGATCATGGAGTACACAAAGACTTGTGATGCTGTCATATATAAGTCATGTGT  
TGAGTTTGAAGGTCCTTACATAGATTACTTGAAGACCCAGTTGGCGAAACCTCTTCTTTTCGCTGGTC  
CTGCTGTTCCCATGCCGCCCTCCGGCATCCTAGAAGCAAAATGGGCAAAATGGTTAGATAATTTCCCTA  
AGAATTCTGTCATATTTTGCAATTTGGGAGTGAGACATACTTAGATGACGTCCAAATAGAGGAGCTG  
GCAATTGGGTTGGAGCTAACTGGGTTGCCCTTTTCTGCTGTTCTGAATTCGGGACCAGTGGTGATGG  
TGCCGAGGCTAAGTTAGAAGCATCATTGCCAAAAGGGTTTAGAGAAAGAGTGAAAGAAAGAGGAGT  
TGTGCACACAGGGTGGGTGCAGCAACAGCATATACTGGCACACCAAAGTGTAGGGGGTTATGTGAAC  
CACTCAGGATTCAGCTCTGTGATTGAGGCCCTTGTGAATGATTGTCAGTTGATAATGATTCGCCAAAAG  
GGGGATCAGCACATAAATTCGAAGTTGCTGAGTAGGGTTCTCAAGGTAGGAGTGGAGGTGAATAGGA  
GAGATGAAGACGGGTATTTTGCAGGGGAGGATATTCTGAATGCAGTTCGAACAGTTATGCTAGAAGTT  
GGTAAGGAACCAGGGAGGTCTATTAGGGCTCATCAGAAGAAATGGAAAGAGTTTCTCCTGAATAAAG  
AGATTGAAGACAAATACATTGCCAATTTGGTCGAGGAACTCAAGGCTTTGGCTCATGAAGCTTAG

MEVTRNGENATKIKLHVVMFPWFAGHINPFIQLSNKLTSHGIQISFLSIPGNISRIQSSLDLSPPNQIPLTIPP  
IEGLPPDVSFSSFLPPQVYELLKLALDQMPPQVKSLLTQLHPDIVLFDFAHHWLPPLASELGIKSANFCVFS  
AVATAYLTVPSRMPDPNQPTFEDMKKPPPGFPETSLTGKTFQAQDFMYLFKSFYEGPPVFERIMEYTKTC  
DAVIYKSCVEFEGPYIDYLKTQLAKPLLFAGPAVPMPPSGILEAKWAKWLDNFPKNSVIFCNFGSETYLLD  
VQIEELAIGLELTGLPFFLVLNFGTSGDGAEAKLEASLPKGFRERVKERGVVHTGWVQQQHILAHQSVGG  
YVNHSGFSSVIEALVNDCQLIMIPQKGDQHINSKLLSRVLKVGVEVNRREDGYFAREDILNAVRTVMLE  
VGKEPGRSIRAHQKKWKEFLLNKEIEDKYIANLVEELKALAHEA

>HU07G01678.1-W

ATGGAAGTTACAAGAAATGGTGAAAATGCAACCAAAATCAAGCTCCATGTAGTTATGTTTCCTTGTT  
TGCATTTGGTCATATAAACCCATTTATCCAGCTATCCAACAAGCTCACCTCCCATGGCATTCAAATCTCT  
TTCTTGTCATACTGGCAACATTTATCGGATCCAGTCATCCCTCGATCTGTCTCCTCCCAACCAAATC  
ATCCCTCTTACTATCCCTCCTATCGAAGGTCTGCCTCCTGATGTTGACAGCAGCTCTTTCTTACCACCA  
CAGGTGTACGAGCTTCTCAAGCTGGCACTTGACCAAATGCAACCCCAAGTGAAGTCCCTTTTAACCC  
AACTACATCCCGATATTGTCTTGTGTTGACTTTGCACACCATTGGCTCCCTCCACTGGCATCCGAATTGG  
GTATCAAGTCTGCCAACTTCTGTGTCTTCTCTGCTGTTGCCAATGCATACCTTATTGTGCCTTCAAGAAT  
GCCTGACCCAAATCAACCCCCACCTTTGAAGACATGAAGAAGCCTCCCCCAGGCTTCCCTGAGACC  
TCGCTTACCGGGATCAAAACATTCCAAGCTCAAGACTTTATGTATCTCTTCAAAAGCTTCTATGAAGGT  
CCCCCTGTTTTTGAGAGGATCATGGAGTACACAAAGACTTGTGATGCTGTGCATATATAAGTCATGTGTT  
GAGTTTGAAGGTCTTACATAGATTACTTGAAGACCCAGTTGGGGAAACCTCTTCTTTTCGCTGGTCC  
TGCTGTTCCCATGCCGCCCTCCGGCATCCTAGAAGCAAAATGGGCAAAATGGTTAGATAATTTCCCTA  
AGAATTCTGTCATATTTTGAATTTGGGAGTGAGACATACTTAGATGACGTCCAAATAGAGGAGCTG  
GCAATTGGGTTGGAGCTAACTGGGTTGCCCTTTTTCCTGGTTCTGAATTTCTGGGACCAGTGGTGATGG  
TGCCGAGGCTAAGTTAGAAGCATCATTGCCAAAAGGGTTTAGAGAAAGAGTGAAAGAAAGAGGAGT  
TGTGCACACAGGGTGGGTGCAGCAACAGCATATACTGGCACACCAAAGTGTAGGGGGTTATCTGAAC  
CACTCAGGATTCAGCTCTGTGATTGAGGCCCTTGTGAATGACTGTCAGTTGATAATGATTCCCCAAAA  
GGGGGATCAGCACATAAATTCGAAGTTGCTGAGTAGGGTTCTCAAGGTAGGAGTGGAGGTGAATAGG  
AGAGATGAAGACGGGTATTTTTCGAGGGAGGATATTCTGAATGCAGTTTGAACAGTTATGCTAGAAGT  
TGATAAGGAACCAGGAGGTCTATTAGGGCTCATCAGAAGAAATGGAAAGAGTTTCTCCTGAATAAA  
GAGATTGAAGACAAATACATTGCCAATTGGTCGAGGAACTCAAGGCTTTGGCTCATGAAGCTTAG

MEVTRNGENATKIKLHVVMFPWFAGHINPFIQLSNKLTSHGIQISFLSIPGNIYRIQSSLDLSPPNQIPLTIP  
PIEGLPPDVSFSSFLPPQVYELLKLALDQMPPQVKSLLTQLHPDIVLFDFAHHWLPPLASELGIKSANFCVF  
SAVANAYLIVPSRMPDPNQPTFEDMKKPPPGFPETSLTGKTFQAQDFMYLFKSFYEGPPVFERIMEYTKT  
CDAVIYKSCVEFEGPYIDYLKTQLGKPLLFAGPAVPMPPSGILEAKWAKWLDNFPKNSVIFCNFGSETYLLD  
DVQIEELAIGLELTGLPFFLVLNFGTSGDGAEAKLEASLPKGFRERVKERGVVHTGWVQQQHILAHQSVG  
GYLNHSGFSSVIEALVNDCQLIMIPQKGDQHINSKLLSRVLKVGVEVNRREDGYFAREDILNAVRTVML  
EVDKEPGRSIRAHQKKWKEFLLNKEIEDKYIANLVEELKALAHEA
