# Supplementary material for: A Genome-Wide Identification Study Reveals That HmoCYP76AD1, HmoDODAα1 and HmocDOPA5GT Involved in Betalain Biosynthesis in Hylocereus
Source: MDPI journal article supplement (doi:10.3390/genes12121858), 2021-11-23
Supplement: s1 [file s1]

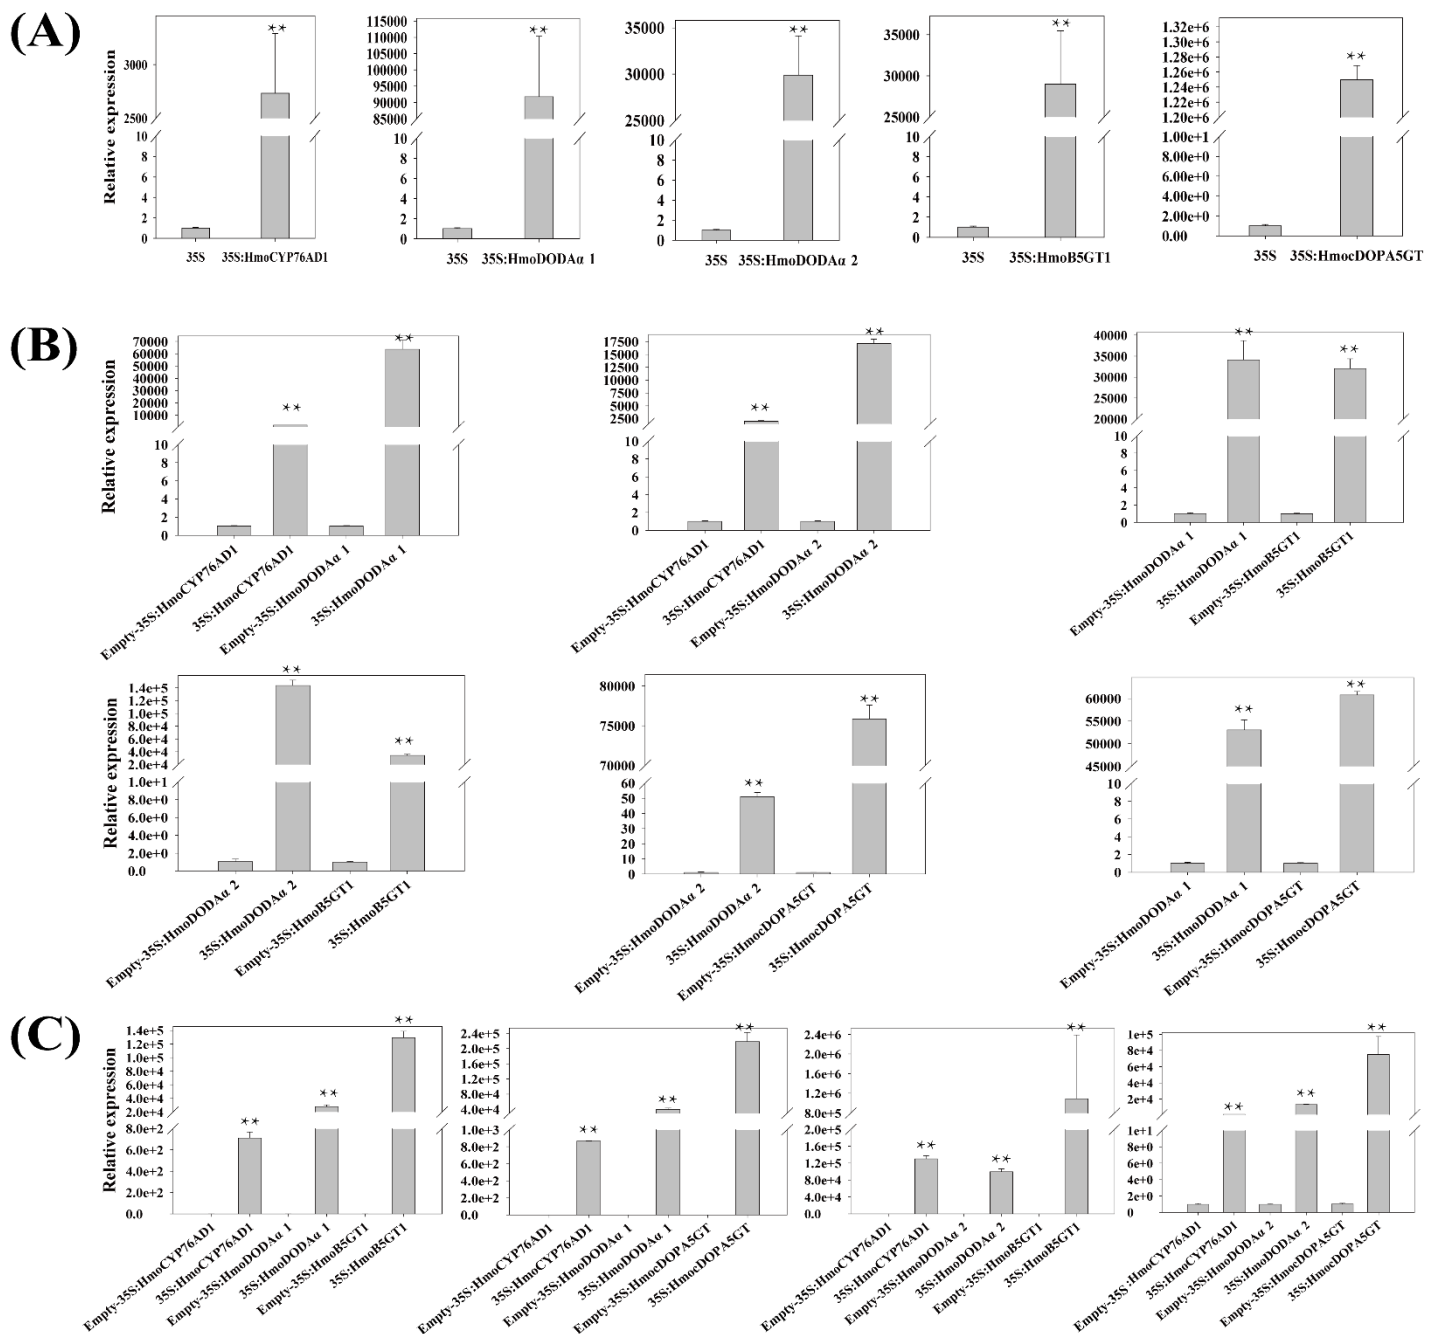

**Figure S3. Gene expression of *N. benthamiana* leaves after infected.**

(A), Single-gene expression of *HmoCYP76AD1*, *HmoDODAA1*, *HmoDODAA2*, *HmoB5GT1* or *HmocDOPA5GT*; (B), Co-expression of *HmoCYP76AD1/HmoDODAA1*, Co-expression of *HmoCYP76AD1/HmoDODAA2*, Co-expression of *HmoDODAA1/HmoB5GT1*, Co-expression of *HmoDODAA2/HmoB5GT1*, Co-expression of *HmoDODAA2/HmocDOPA5GT*, Co-expression of *HmoDODAA1/HmocDOPA5GT*; (C), Co-expression of *HmoCYP76AD1/HmoDODAA1/HmoB5GT1*, Co-expression of *HmoCYP76AD1/HmoDODAA2/HmoB5GT1*, Co-expression of *HmoCYP76AD1/HmoDODAA1/HmocDOPA5GT*, Co-expression of *HmoCYP76AD1/HmoDODAA2/HmocDOPA5GT*.
