# Supplementary material for: A Genome-Wide Identification Study Reveals That HmoCYP76AD1, HmoDODAα1 and HmocDOPA5GT Involved in Betalain Biosynthesis in Hylocereus
Source: MDPI journal article supplement (doi:10.3390/genes12121858), 2021-11-23
Supplement: s1 [file s1]

**Table S3A.** The Basic information of *CYP76AD* in pitaya.

| Gene Name           | Chr. | Gene Length<br>(bp) | Amino<br>Acids | pI   | MW<br>(kDa) | GRAVY <sup>1</sup> | Instability<br>Index |
|---------------------|------|---------------------|----------------|------|-------------|--------------------|----------------------|
| <i>HU01G02117.1</i> | 1    | 24714               | 733            | 6.21 | 82.72       | 0.032              | 38.49                |
| <i>HU03G00480.1</i> | 3    | 3338                | 506            | 8.91 | 57.67       | -0.117             | 44.73                |
| <i>HU03G00481.1</i> | 3    | 2837                | 442            | 9.39 | 49.89       | -0.111             | 38.84                |
| <i>HU03G00482.1</i> | 3    | 1684                | 498            | 6.51 | 56.55       | -0.095             | 35.02                |
| <i>HU04G00093.1</i> | 4    | 11846               | 1025           | 6.88 | 114.44      | 0.082              | 30.31                |
| <i>HU05G00563.1</i> | 5    | 1978                | 496            | 6.82 | 55.36       | -0.093             | 45.22                |
| <i>HU07G00498.1</i> | 7    | 2814                | 511            | 7.00 | 58.14       | -0.135             | 47.24                |
| <i>HU07G00499.1</i> | 7    | 2403                | 504            | 7.73 | 57.37       | -0.145             | 47.05                |
| <i>HU07G00500.1</i> | 7    | 27114               | 711            | 5.99 | 80.85       | -0.110             | 45.57                |
| <i>HU07G00504.1</i> | 7    | 2282                | 511            | 6.58 | 58.15       | -0.123             | 48.29                |
| <i>HU07G00510.1</i> | 7    | 2515                | 491            | 8.95 | 55.86       | -0.178             | 39.52                |
| <i>HU07G00784.1</i> | 7    | 18290               | 438            | 5.98 | 49.88       | 0.082              | 39.83                |
| <i>HU09G01023.1</i> | 9    | 1796                | 446            | 6.68 | 50.46       | -0.080             | 40.71                |
| <i>HU11G01017.1</i> | 11   | 71367               | 1835           | 9.22 | 208.48      | -0.275             | 37.36                |
| <i>HU11G01870.1</i> | 11   | 2639                | 489            | 6.90 | 54.92       | -0.076             | 33.14                |

<sup>1</sup>: If GRAVY score of a protein was less than zero, it was considered to be hydrophilic.

**Table S3B.** Basic information of *DODA* genes in pitaya.

| Gene Name           | Chr. | Gene Length<br>(bp) | Amino<br>Acids | pI   | MW<br>(kDa) | GRAVY <sup>1</sup> | Instability<br>Index |
|---------------------|------|---------------------|----------------|------|-------------|--------------------|----------------------|
| <i>HU03G01342.1</i> | 3    | 9485                | 271            | 5.66 | 29.94       | -0.163             | 27.31                |

|                     |   |      |     |      |       |        |       |
|---------------------|---|------|-----|------|-------|--------|-------|
| <i>HU08G01571.1</i> | 8 | 3921 | 375 | 9.25 | 42.17 | -0.421 | 35.57 |
| <i>HU08G01572.1</i> | 8 | 3882 | 318 | 6.22 | 35.50 | -0.207 | 37.48 |

<sup>1</sup>: If GRAVY score of a protein was less than zero, it was considered to be hydrophilic.

**Table S3C.** Basic information of *GT* genes in pitaya.

| Gene Name           | Chr. | Gene Length<br>(bp) | Amino<br>Acids | pI   | MW<br>(kDa) | GRAVY <sup>1</sup> | Instability<br>Index |
|---------------------|------|---------------------|----------------|------|-------------|--------------------|----------------------|
| <i>HU01G00156.1</i> | 1    | 1686                | 484            | 5.35 | 55.40       | -0.133             | 48.52                |
| <i>HU01G00157.1</i> | 1    | 1449                | 482            | 5.60 | 54.91       | -0.278             | 50.02                |
| <i>HU01G00158.1</i> | 1    | 2127                | 486            | 6.01 | 54.69       | -0.256             | 44.93                |
| <i>HU01G00159.1</i> | 1    | 1623                | 486            | 6.01 | 54.70       | -0.273             | 45.83                |
| <i>HU01G00761.1</i> | 1    | 4727                | 444            | 5.63 | 49.89       | -0.121             | 48.64                |
| <i>HU02G01765.1</i> | 2    | 1823                | 475            | 5.81 | 53.33       | -0.271             | 50.74                |
| <i>HU03G00258.1</i> | 3    | 1999                | 481            | 5.97 | 54.31       | -0.182             | 41.87                |
| <i>HU03G00266.1</i> | 3    | 1598                | 477            | 5.36 | 54.01       | -0.173             | 46.80                |
| <i>HU03G00267.1</i> | 3    | 1708                | 472            | 5.66 | 52.84       | -0.047             | 41.00                |
| <i>HU03G01671.1</i> | 3    | 11126               | 466            | 5.44 | 52.27       | -0.264             | 48.56                |
| <i>HU03G02206.1</i> | 3    | 1392                | 463            | 6.32 | 51.33       | 0.086              | 35.69                |
| <i>HU04G00198.1</i> | 4    | 21223               | 869            | 6.01 | 96.81       | -0.129             | 43.65                |
| <i>HU04G01617.1</i> | 4    | 2715                | 464            | 6.18 | 51.01       | 0.103              | 35.87                |
| <i>HU05G01235.1</i> | 5    | 1805                | 446            | 5.70 | 50.26       | -0.209             | 48.71                |
| <i>HU05G01532.1</i> | 5    | 1445                | 381            | 5.33 | 42.56       | -0.036             | 42.66                |

|                     |    |       |     |      |       |        |       |
|---------------------|----|-------|-----|------|-------|--------|-------|
| <i>HU06G00241.1</i> | 6  | 1490  | 489 | 5.47 | 54.74 | -0.116 | 43.34 |
| <i>HU06G00242.1</i> | 6  | 1470  | 489 | 5.34 | 54.72 | -0.108 | 40.86 |
| <i>HU06G00243.1</i> | 6  | 1628  | 486 | 5.30 | 54.45 | -0.236 | 48.12 |
| <i>HU06G00244.1</i> | 6  | 12389 | 493 | 5.63 | 54.77 | -0.151 | 42.40 |
| <i>HU07G00076.1</i> | 7  | 2061  | 468 | 6.00 | 51.37 | -0.082 | 42.73 |
| <i>HU07G00240.1</i> | 7  | 1520  | 493 | 5.73 | 55.13 | -0.211 | 49.79 |
| <i>HU07G01550.1</i> | 7  | 1392  | 463 | 5.73 | 51.36 | 0.079  | 37.37 |
| <i>HU07G01678.1</i> | 7  | 1917  | 475 | 5.68 | 53.40 | -0.111 | 36.95 |
| <i>HU08G02083.1</i> | 8  | 3292  | 484 | 5.91 | 54.19 | -0.180 | 38.07 |
| <i>HU09G01034.1</i> | 9  | 1612  | 458 | 5.95 | 51.02 | -0.049 | 47.49 |
| <i>HU09G01039.1</i> | 9  | 1733  | 458 | 5.87 | 50.79 | -0.005 | 47.44 |
| <i>HU09G01874.1</i> | 9  | 1969  | 475 | 5.77 | 53.74 | -0.300 | 52.89 |
| <i>HU09G01875.1</i> | 9  | 1702  | 475 | 5.67 | 53.52 | -0.297 | 50.08 |
| <i>HU10G00514.1</i> | 10 | 1624  | 484 | 5.74 | 54.75 | -0.191 | 46.15 |
| <i>HU10G01599.1</i> | 10 | 1922  | 459 | 5.67 | 50.94 | 0.029  | 44.48 |
| <i>HU11G01695.1</i> | 11 | 2049  | 474 | 6.21 | 52.15 | -0.141 | 44.13 |
| <i>HU11G01696.1</i> | 11 | 1859  | 480 | 5.71 | 52.91 | -0.033 | 42.62 |
| <i>HU11G01697.1</i> | 11 | 1904  | 479 | 6.35 | 52.84 | 0.032  | 39.97 |
| <i>HU11G01698.1</i> | 11 | 1413  | 470 | 5.93 | 51.66 | -0.028 | 37.82 |
| <i>HU11G01699.1</i> | 11 | 1716  | 470 | 5.65 | 51.96 | -0.090 | 42.50 |

---

<sup>1</sup>: If GRAVY score of a protein was less than zero, it was considered to be hydrophilic.
