# Supplementary material for: A Genome-Wide Identification Study Reveals That HmoCYP76AD1, HmoDODAα1 and HmocDOPA5GT Involved in Betalain Biosynthesis in Hylocereus
Source: MDPI journal article supplement (doi:10.3390/genes12121858), 2021-11-23
Supplement: s1 [file s1]

pC18:HmoDODA $\alpha$ 1-HmoB5GT1

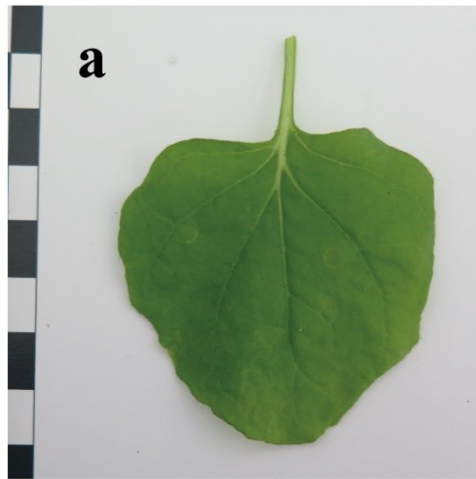

pC18:HmoDODA $\alpha$ 1-HmocDOPA5GT

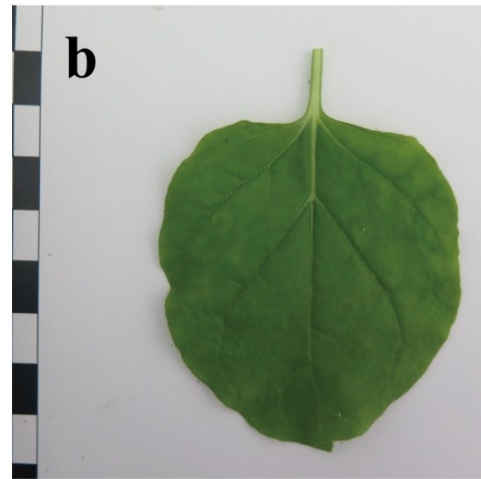

pC18:HmoDODA $\alpha$ 2-HmoB5GT1

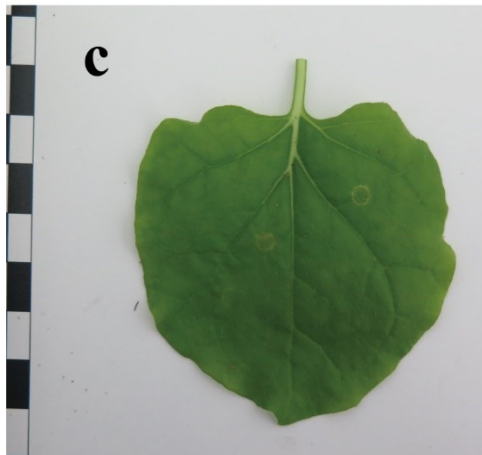

pC18:HmoDODA $\alpha$ 2-HmocDOPA5GT

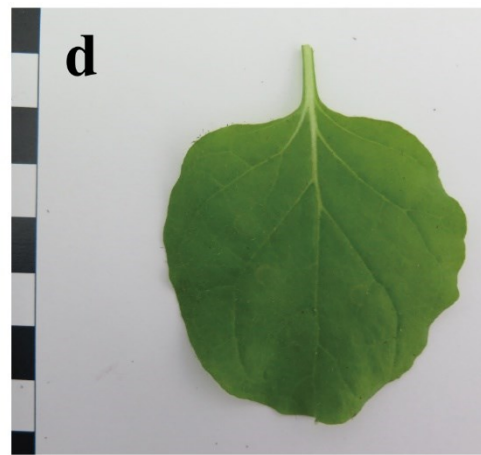

**Figure S3. Phenotype of *N. benthamiana* leaves after infected.**

(a), Co-expression of *HmoDODA $\alpha$ 1/HmoB5GT1*; (b), Co-expression of *HmoDODA $\alpha$ 1/HmocDOPA5GT*; (c), Co-expression of *HmoDODA $\alpha$ 2/HmoB5GT1*; (D), Co-expression of *HmoDODA $\alpha$ 1/HmocDOPA5GT*.
