# Supplementary material for: A Genome-Wide Identification Study Reveals That HmoCYP76AD1, HmoDODAα1 and HmocDOPA5GT Involved in Betalain Biosynthesis in Hylocereus
Source: MDPI journal article supplement (doi:10.3390/genes12121858), 2021-11-23
Supplement: s1 [file s1]

**Table S1.** The accession numbers of genes in the paper.

| Species                                              | Genes                           | GenBank accession No. |
|------------------------------------------------------|---------------------------------|-----------------------|
| <i>Beta vulgaris</i>                                 | <i>BvADH<math>\alpha</math></i> | AST12931.1            |
| <i>Beta vulgaris</i>                                 | <i>BvADH<math>\beta</math></i>  | AST12926.1            |
| <i>Mirabilis jalapa</i>                              | <i>MjADH<math>\alpha</math></i> | AMR60658.1            |
| <i>Nepenthes ventricosa</i> × <i>Nepenthes alata</i> | <i>NaADH<math>\beta</math></i>  | AST12937.1            |
| <i>Portulaca oleracea</i>                            | <i>PoADH<math>\alpha</math></i> | AST12940.1            |
| <i>Rivina humilis</i>                                | <i>RhADH<math>\alpha</math></i> | AST12939.1            |
| <i>Spinacia oleracea</i>                             | <i>SoADH<math>\alpha</math></i> | AST12938.1            |
| <i>Spinacia oleracea</i>                             | <i>SoADH<math>\beta</math></i>  | AST12936.1            |
| <i>Amaranthus cruentus</i>                           | <i>AcCYP76AD2</i>               | AET43291.1            |
| <i>Amaranthus hybridus</i>                           | <i>AhCYP76AD1-like</i>          | AKI33932.1            |
| <i>Basella alba</i>                                  | <i>BaCYP76AD13</i>              | AJD87469.1            |
| <i>Basella alba</i>                                  | <i>BaCYP76AD14</i>              | AJD87470.1            |
| <i>Beta vulgaris</i>                                 | <i>BvCYP76AD5</i>               | AJD87473.1            |
| <i>Beta vulgaris</i>                                 | <i>BvCYP76AD6</i>               | ALS88208.1            |
| <i>Beta vulgaris</i>                                 | <i>BvCYP76AD1</i>               | AQS22859.1            |
| <i>Beta vulgaris</i>                                 | <i>Bv_xkhk</i>                  |                       |
| <i>Beta vulgaris</i>                                 | <i>Bv_sidm</i>                  |                       |
| <i>Cleretum bellidiforme</i>                         | <i>CbCYP76AD12</i>              | AJD87468.1            |
| <i>Cleretum bellidiforme</i>                         | <i>CbCYP76AD16</i>              | AJD87472.1            |
| <i>Celosia cristata</i>                              | <i>CcCYP76AD4</i>               | AGI78466.1            |
| <i>Chenopodium quinoa</i>                            | <i>CqCYP76AD1</i>               | XP_021769302.1        |
| <i>Dianthus caryophyllus</i>                         | <i>DcCYP76AD19</i>              | AMA07825.1            |
| <i>Mirabilis jalapa</i>                              | <i>MjCYP76</i>                  | ALT04745.1            |
| <i>Mirabilis jalapa</i>                              | <i>MjCYP76AD3</i>               | AET43292.1            |

| <b>Species</b>                       | <b>Genes</b>       | <b>GenBank accession No.</b> |
|--------------------------------------|--------------------|------------------------------|
| <i>Mirabilis jalapa</i>              | <i>MjCYP76AD7</i>  | AJD87463.1                   |
| <i>Mirabilis jalapa</i>              | <i>MjCYP76AD15</i> | AJD87471.1                   |
| <i>Opuntia ficus</i>                 | <i>OfCYP76AD8</i>  | AJD87464.1                   |
| <i>Opuntia ficus</i>                 | <i>OfCYP76AD9</i>  | AJD87465.1                   |
| <i>Phytolacca americana</i>          | <i>PaCYP76AD10</i> | AJD87466.1                   |
| <i>Phytolacca americana</i>          | <i>PaCYP76AD11</i> | AJD87467.1                   |
| <i>Mollugo verticillata</i>          | <i>MvCYP76AD17</i> | AMA07822.1                   |
| <i>Mollugo verticillata</i>          | <i>MvCYP76F84</i>  | AMA07823.1                   |
| <i>Carnegiea gigantea</i>            | <i>CgDODAA1</i>    | MN136222                     |
| <i>Carnegiea gigantea</i>            | <i>CgDODAA2</i>    | MN136223                     |
| <i>Carnegiea gigantea</i>            | <i>CgDODAB</i>     | MN136224                     |
| <i>Chenopodium quinoa</i>            | <i>CqDODAI</i>     | XM_021913611.1               |
| <i>Beta vulgaris</i>                 | <i>BvDODAA1</i>    | HQ656027.1                   |
| <i>Beta vulgaris</i>                 | <i>BvDODAA2</i>    | MN153195                     |
| <i>Beta vulgaris</i>                 | <i>BvDODAA3</i>    | MN153196                     |
| <i>Beta vulgaris</i>                 | <i>BvDODAA4</i>    | MN136228                     |
| <i>Beta vulgaris</i>                 | <i>BvDODAA5</i>    | MN153197                     |
| <i>Beta vulgaris</i>                 | <i>BvDODAB</i>     | MN153198                     |
| <i>Mesembryanthemum crystallinum</i> | <i>McDODAA1</i>    | MN136225                     |
| <i>Mesembryanthemum crystallinum</i> | <i>McDODAA2</i>    | MN136226                     |
| <i>Mesembryanthemum crystallinum</i> | <i>McDODAB</i>     | MN136227                     |
| <i>Stegnosperma halimifolium</i>     | <i>ShDODAA1</i>    | MN136219                     |
| <i>Stegnosperma halimifolium</i>     | <i>ShDODAA2</i>    | MN136220                     |
| <i>Stegnosperma halimifolium</i>     | <i>ShDODAB</i>     | MN136221                     |
| <i>Macarthuria australis</i>         | <i>MaDODAA</i>     | MN153205                     |

| <b>Species</b>                    | <b>Genes</b>                       | <b>GenBank accession No.</b> |
|-----------------------------------|------------------------------------|------------------------------|
| <i>Limeum aethiopicum</i>         | <i>LaDODA</i>                      | MN153203                     |
| <i>Kewa caespitosa</i>            | <i>KcDODAA<math>\alpha</math>1</i> | MN153209                     |
| <i>Kewa caespitosa</i>            | <i>KcDODAA<math>\alpha</math>2</i> | MN153210                     |
| <i>Polycarpon tetraphyllum</i>    | <i>PtDODA</i>                      | MN153211                     |
| <i>Cardionema ramosissimum</i>    | <i>CrDODA</i>                      | MN153200                     |
| <i>Spergularia marina</i>         | <i>SmDODAA<math>\alpha</math></i>  | MN153204                     |
| <i>Telephium imperati</i>         | <i>TiDODA</i>                      | MN153212                     |
| <i>Parakeelya mirabilis</i>       | <i>PmDOD</i>                       | KF747352.1                   |
| <i>Parakeelya mirabilis</i>       | <i>PmDOD-like</i>                  | KF747353.1                   |
| <i>Ptilotus hybrid</i>            | <i>PhybDOD-like</i>                | KF747354.1                   |
| <i>Mirabilis jalapa</i>           | <i>MjDOD</i>                       | AB435372.1                   |
| <i>Portulaca grandiflora</i>      | <i>PgDODA</i>                      | AJ580598.1                   |
| <i>Amaranthus hypochondriacus</i> | <i>AhUGT79B30-like2</i>            | AH018627-RA                  |
| <i>Amaranthus hypochondriacus</i> | <i>AhUGT79B30-like3</i>            | AH018628-RA                  |
| <i>Amaranthus hypochondriacus</i> | <i>AhUGT79B30-like</i>             | AH018629-RA                  |
| <i>Amaranthus hypochondriacus</i> | <i>AhB5GT</i>                      | AHV78225.1                   |
| <i>Amaranthus hypochondriacus</i> | <i>AhCDOPA5GT</i>                  | AHV78226.1                   |
| <i>Amaranthus tricolor</i>        | <i>AmaB5GT</i>                     | AJY59053.1                   |
| <i>Amaranthus tricolor</i>        | <i>AmaB6GT</i>                     | AJY59055.1                   |
| <i>Amaranthus tricolor</i>        | <i>AmaCDOPA5GT</i>                 | AJY59054.1                   |
| <i>Beta vulgaris</i>              | <i>Bv3GGT-like1</i>                | XP_010695817                 |
| <i>Beta vulgaris</i>              | <i>Bv3GGT-like2</i>                | XP_010686377                 |
| <i>Beta vulgaris</i>              | <i>BvUGT97B30-like</i>             | XP_010666234                 |
| <i>Beta vulgaris</i>              | <i>BvUGT97B6-like1</i>             | XP_010674067                 |
| <i>Beta vulgaris</i>              | <i>BvUGT97B6-like2</i>             | XP_010675464                 |

| <b>Species</b>                   | <b>Genes</b>            | <b>GenBank accession No.</b> |
|----------------------------------|-------------------------|------------------------------|
| <i>Beta vulgaris</i>             | <i>BvGT partial</i>     | AAO88911.1                   |
| <i>Beta vulgaris</i>             | <i>BvUGT71F1</i>        | AAS94329.1                   |
| <i>Beta vulgaris</i>             | <i>BvUGT73A4</i>        | AAS94330.1                   |
| <i>Beta vulgaris</i>             | <i>BvUGT92A1-like</i>   | XP_10681653.1                |
| <i>Bougainvillea spectabilis</i> | <i>BsCDOPA5GT</i>       | AIS20905.1                   |
| <i>Cleretum bellidiforme</i>     | <i>CbB5GT</i>           | CAB56231.1                   |
| <i>Cleretum bellidiforme</i>     | <i>CbB6GT</i>           | AF374004.1                   |
| <i>Celosia cristata</i>          | <i>CcDOPA5GT</i>        | BAD91804.1                   |
| <i>Chenopodium quinoa</i>        | <i>CqUGT79B6-like1</i>  | XP_021719267                 |
| <i>Chenopodium quinoa</i>        | <i>Cq3GGT-like1</i>     | XP_021726554                 |
| <i>Chenopodium quinoa</i>        | <i>CqUGT79B2-like</i>   | XP_021731181                 |
| <i>Chenopodium quinoa</i>        | <i>CqUGT79B30-like1</i> | XP_021735671                 |
| <i>Chenopodium quinoa</i>        | <i>Cq3GGT-like2</i>     | XP_021735839                 |
| <i>Chenopodium quinoa</i>        | <i>CqUGT79B30-like2</i> | XP_021735840                 |
| <i>Chenopodium quinoa</i>        | <i>CqAmaSy2</i>         | XP_021735841                 |
| <i>Chenopodium quinoa</i>        | <i>CqUGT79B6-like2</i>  | XP_021747968                 |
| <i>Chenopodium quinoa</i>        | <i>CqAmaSy1</i>         | XP_021754077                 |
| <i>Chenopodium quinoa</i>        | <i>CqUGT79B30-like5</i> | XP_021758620                 |
| <i>Chenopodium quinoa</i>        | <i>Cq3GGT-like3</i>     | XP_021766006                 |
| <i>Chenopodium quinoa</i>        | <i>CqUGT79B6-like3</i>  | XP_021773738                 |
| <i>Chenopodium quinoa</i>        | <i>CqUGT92A1-like</i>   | XP_021748306.1               |
| <i>Mirabilis jalapa</i>          | <i>MjCDOPA5GT</i>       | BAD91803.1                   |
| <i>Opuntia ficus-indica</i>      | <i>OfB5GT putative</i>  | ABW79879.1                   |
| <i>Phytolacca americana</i>      | <i>PaGT3</i>            | BAG71127.1                   |
| <i>Phytolacca americana</i>      | <i>PaGT2</i>            | BAG71125.1                   |
