# Supplementary material for: A Genome-Wide Identification Study Reveals That HmoCYP76AD1, HmoDODAα1 and HmocDOPA5GT Involved in Betalain Biosynthesis in Hylocereus
Source: MDPI journal article supplement (doi:10.3390/genes12121858), 2021-11-23
Supplement: s1 [file s1]

**Table S4.** Amino acid sequence similarities between *H. monacanthus* and *H. undatus*.

| Gene name           | Identity (%) |
|---------------------|--------------|
| <i>HU03G00480.1</i> | 100.00       |
| <i>HU01G02117.1</i> | 62.76        |
| <i>HU04G00093.1</i> | 99.51        |
| <i>HU05G00563.1</i> | 98.99        |
| <i>HU07G00504.1</i> | 99.41        |
| <i>HU07G00784.1</i> | 100.00       |
| <i>HU09G01023.1</i> | 100.00       |
| <i>HU11G01017.1</i> | 97.25        |
| <i>HU11G01870.1</i> | 100.00       |
| <i>HU03G01342.1</i> | 98.52        |
| <i>HU08G01572.1</i> | 99.69        |
| <i>HU08G01571.1</i> | 99.20        |
| <i>HU01G00156.1</i> | 100.00       |
| <i>HU01G00157.1</i> | 100.00       |
| <i>HU03G00258.1</i> | 98.75        |
| <i>HU03G00266.1</i> | 99.58        |
| <i>HU03G00267.1</i> | 100.00       |
| <i>HU10G00514.1</i> | 98.35        |
| <i>HU06G00241.1</i> | 99.39        |
| <i>HU06G00243.1</i> | 96.30        |
| <i>HU07G00076.1</i> | 99.79        |
| <i>HU11G01695.1</i> | 98.95        |
| <i>HU11G01696.1</i> | 99.13        |
| <i>HU11G01697.1</i> | 100.00       |
| <i>HU11G01698.1</i> | 98.30        |

| Gene name           | Identity (%) |
|---------------------|--------------|
| <i>HU05G01532.1</i> | 100.00       |
| <i>HU07G00240.1</i> | 100.00       |
| <i>HU08G02083.1</i> | 100.00       |
| <i>HU09G01874.1</i> | 99.02        |
| <i>HU09G01875.1</i> | 100.00       |
| <i>HU03G02206.1</i> | 95.7         |
| <i>HU07G01550.1</i> | 100.00       |
| <i>HU09G01034.1</i> | 96.72        |
| <i>HU04G00198.1</i> | 52.24        |
| <i>HU10G01599.1</i> | 100.00       |
| <i>HU07G01678.1</i> | 98.74        |
