# Supplementary figures and images for: A Genome-Wide Identification Study Reveals That HmoCYP76AD1, HmoDODAα1 and HmocDOPA5GT Involved in Betalain Biosynthesis in Hylocereus
Source: MDPI journal article supplement (doi:10.3390/genes12121858), 2021-11-23

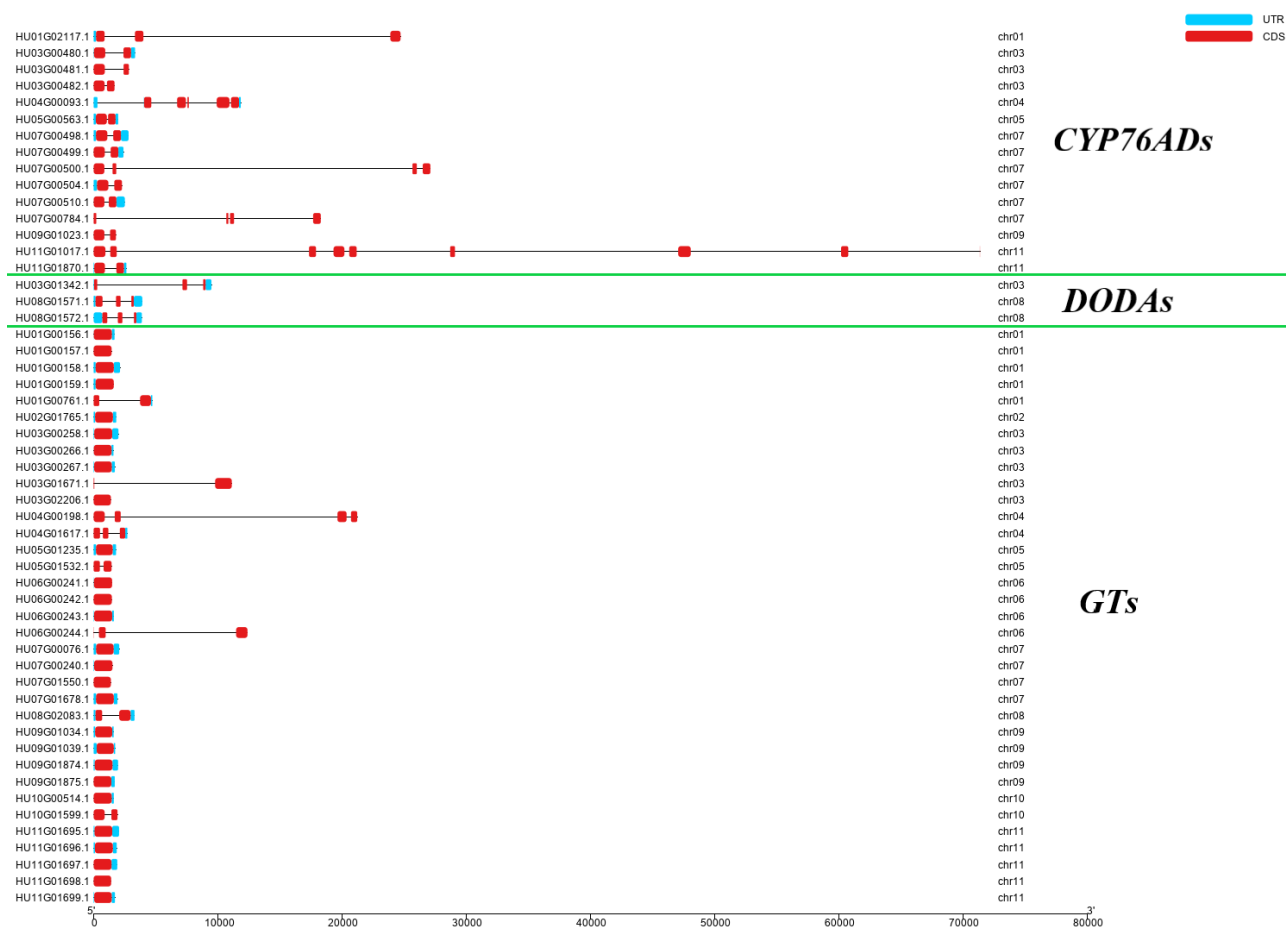

**Figure S1. Gene structures of 53 genes.**

Supplement: s1 [file s1]
